# Supplementary material for: Copper-catalyzed thiocyanation of cyclobutanone oxime esters using ammonium thiocyanate
Source: Royal Society of Chemistry journal article supplement (doi:10.1039/d3ob01898a), 2024-01-01

Supporting information for

## **Copper-Catalyzed Thiocyanation of Cyclobutanone Oxime Esters using Ammonium Thiocyanate**

Xia Zhao,\*<sup>a</sup> Tengteng Sun,<sup>a</sup> Wenxin Gu,<sup>a</sup> Jingwen Qin,<sup>a</sup> Kui Lu<sup>c</sup> and Fei Ye\*<sup>b</sup>

<sup>a</sup> *College of Chemistry, Tianjin Key Laboratory of Structure and Performance for Functional Molecules, Key laboratory of Inorganic-organic Hybrid Functional Material Chemistry, Ministry of Education, Tianjin Normal University, Tianjin, China, 300387 E-mail: hxxyzhx@mail.tjnu.edu.cn*

<sup>b</sup> *CCNU-uOttawa Joint Research Centre, Key Laboratory of Pesticides & Chemical Biology Ministry of Education, College of Chemistry, Central China Normal University, Wuhan, China, 430079 E-mail: yef@mail.ccnu.edu.cn*

<sup>c</sup> *China International Science and Technology Cooperation Base of Food Nutrition/Safety and Medicinal Chemistry, College of Biotechnology, Tianjin University of Science & Technology, Tianjin, China, 300457*

### **Contents Page**

**1. NMR spectra**

**S2-S101**

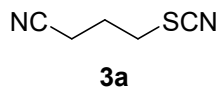

7.26

3.10  
3.08  
3.06  
2.61  
2.59  
2.58  
2.24  
2.22  
2.21  
2.21  
2.19  
2.17

```

Current Data Parameters
NAME      STT-1-19-2-1-H
EXPNO     1
PROCNO    1

F2 - Acquisition Parameters
Date_     20201204
Time      11.51
INSTRUM   spect
PROBHD    5 mm PABBO BB-
PULPROG   zg30
TD         65536
SOLVENT   CDC13
NS         16
DS         2
SWH        8223.685 Hz
FIDRES     0.125483 Hz
AQ          3.9845889 sec
RG          101
DW          60.800 usec
DE          6.50 usec
TE          296.0 K
D1          1.00000000 sec

===== CHANNEL f1 =====
NUC1       1H
P1          14.00 usec
PLW1        20.0000000 W
SFO1        400.1324710 MHz

F2 - Processing parameters
SI          65536
SF          400.1300096 MHz
WDW         EM
SSB         0
LB          0.30 Hz
GB          0
PC          1.00
  
```

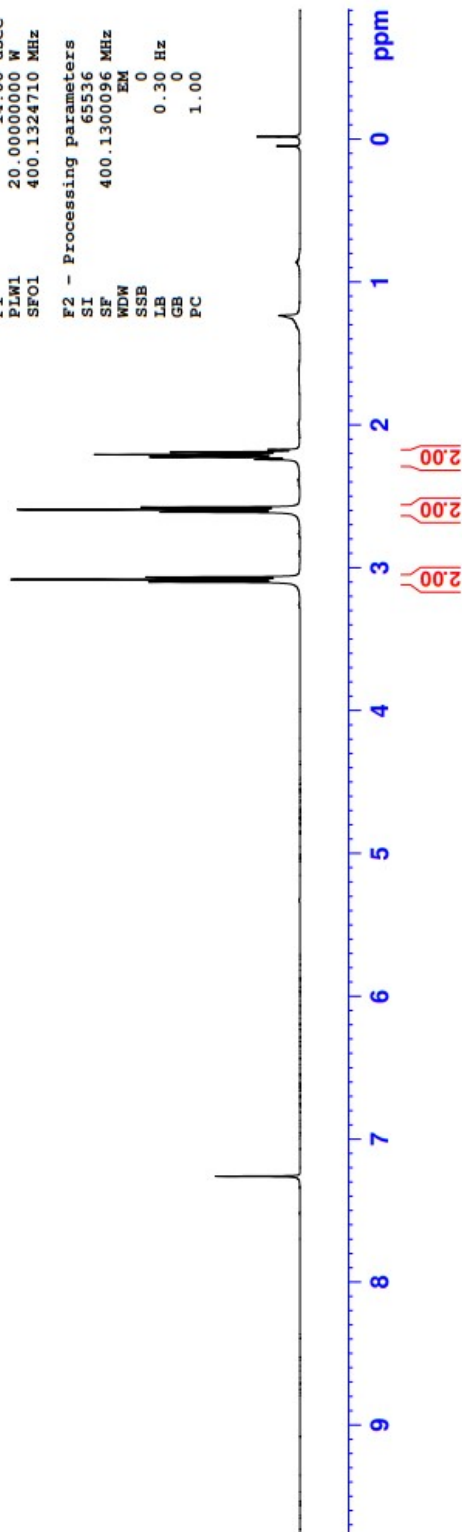

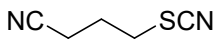

3a

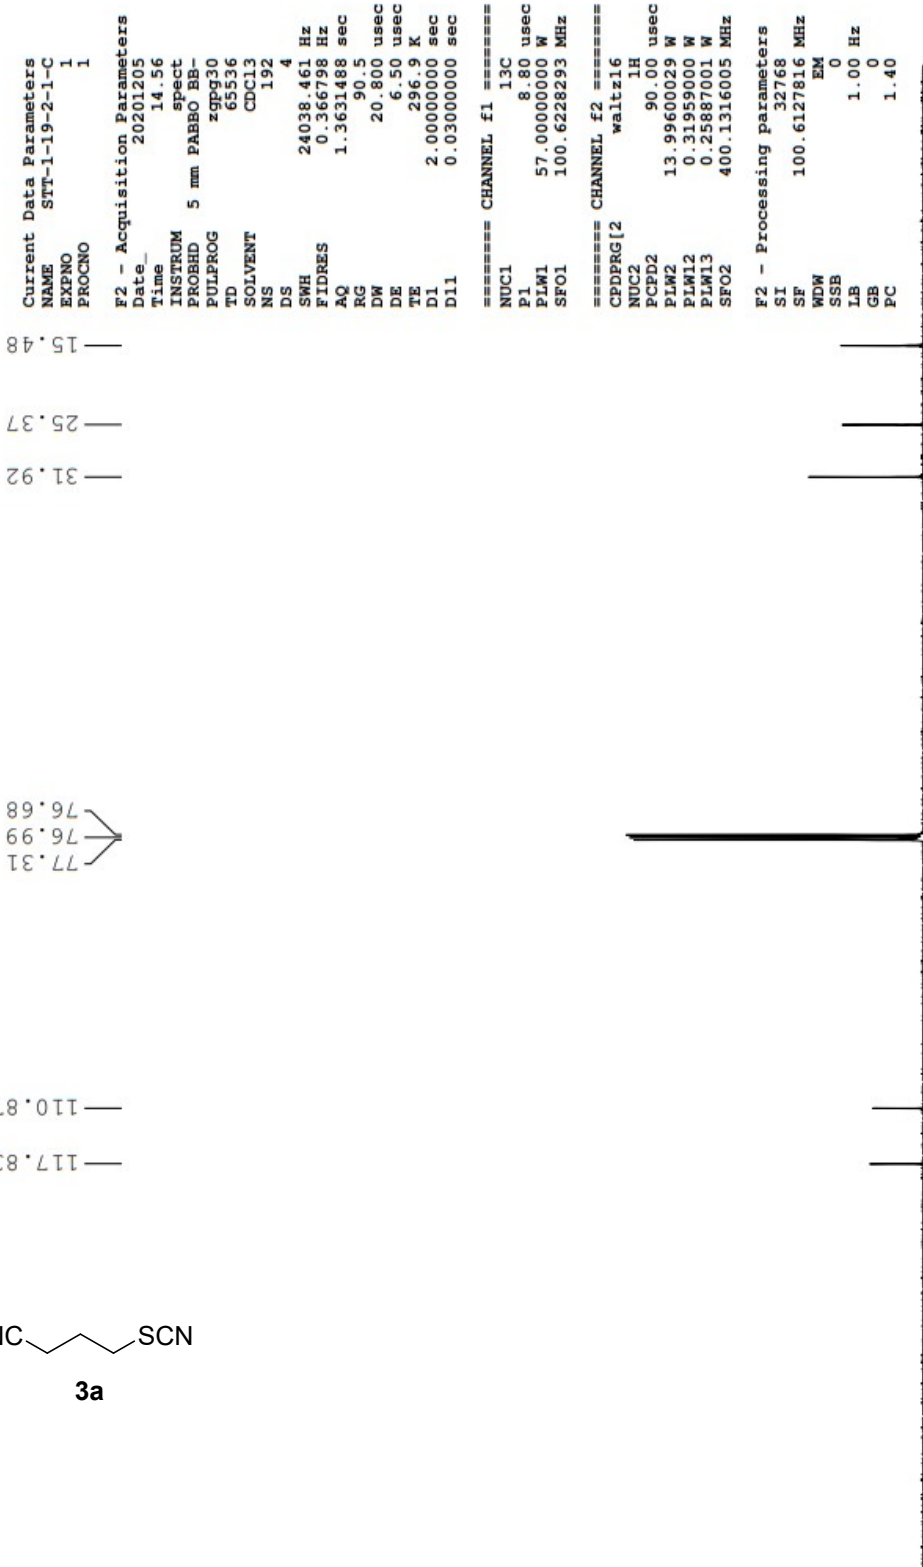

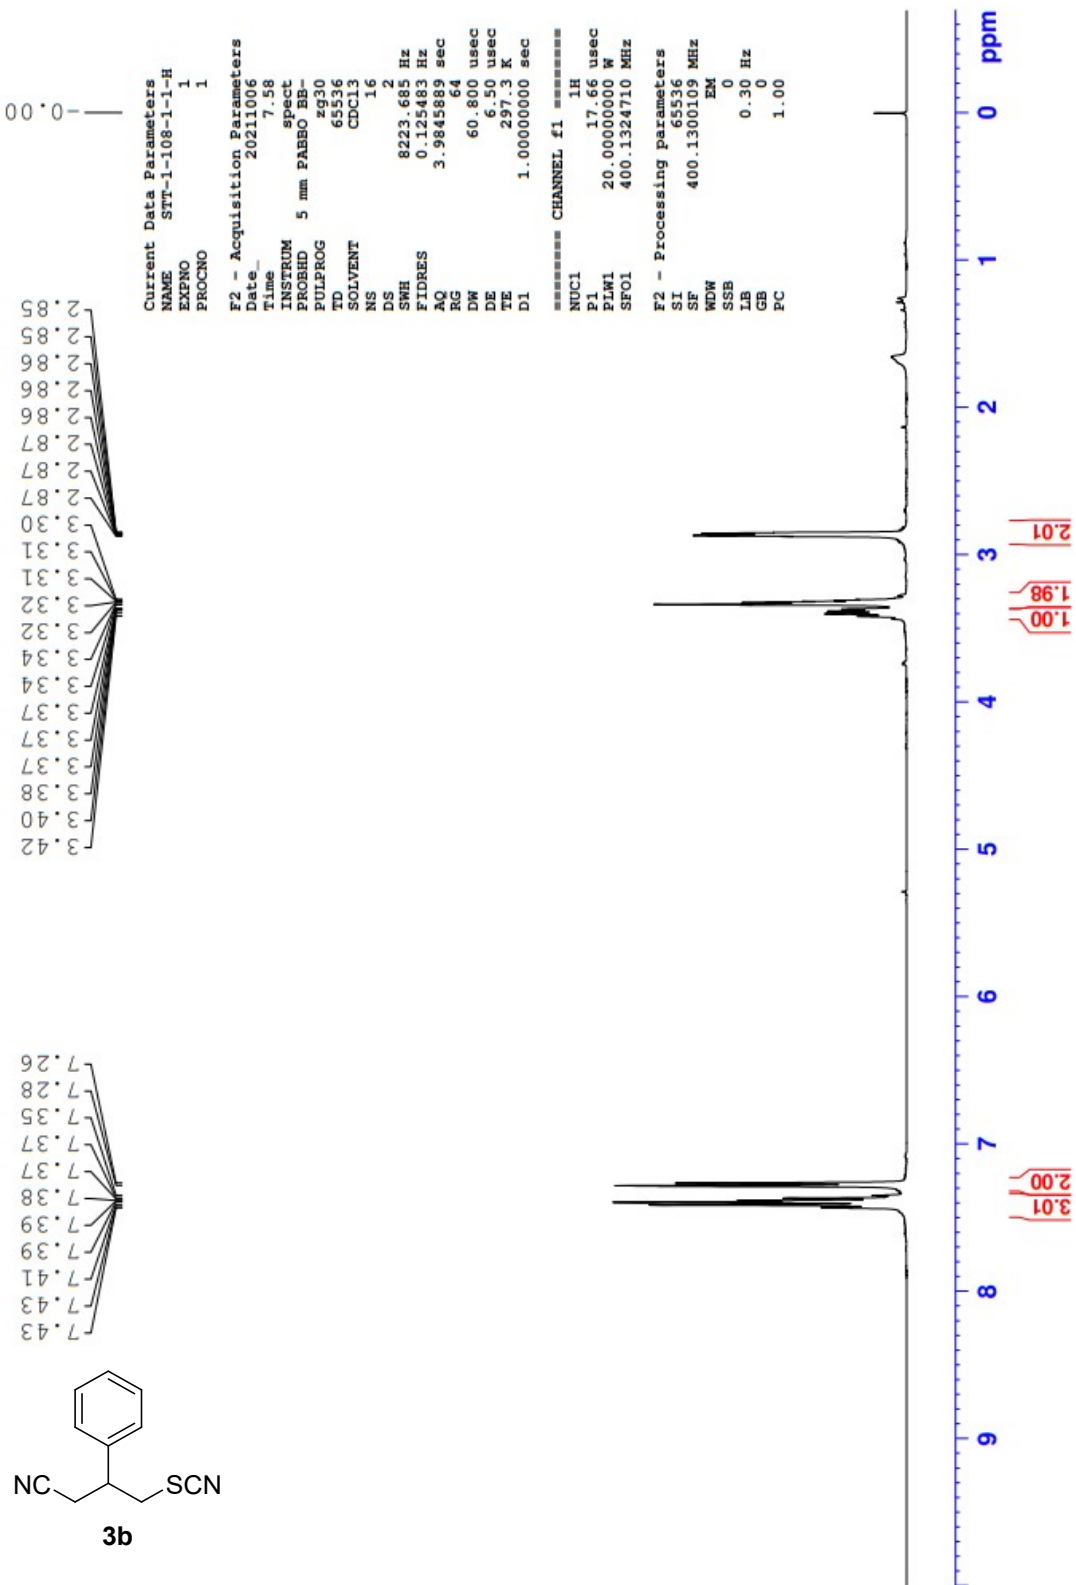



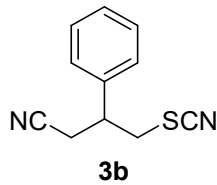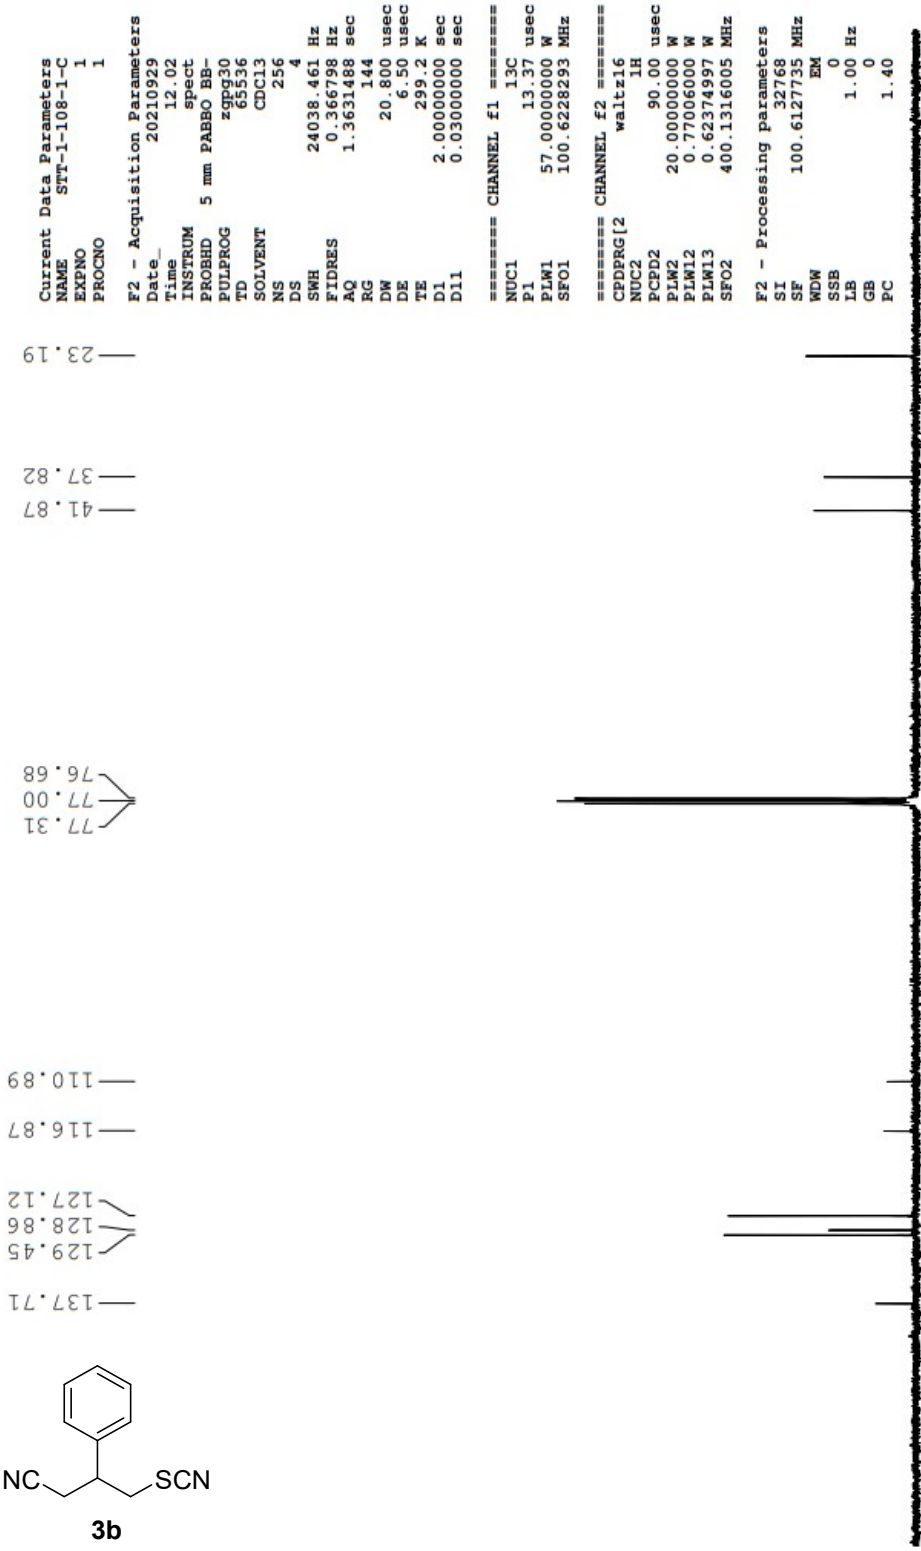

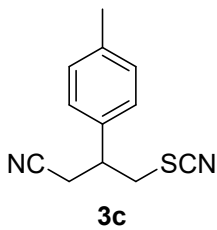

7.26  
7.23  
7.21  
7.17  
7.15

3.39  
3.37  
3.37  
3.35  
3.35  
3.33  
3.32  
3.31  
3.31  
3.29  
3.28  
2.85  
2.83  
2.36

Current Data Parameters  
 NAME STT-1-143-1-H  
 EXPNO 1  
 PROCNO 1

F2 - Acquisition Parameters  
 Date\_ 20211208  
 Time 7.58  
 INSTRUM spect  
 PROBED 5 mm PABBO BB-  
 PULPROG zg30  
 TD 65536  
 SOLVENT CDC13  
 NS 16  
 DS 2  
 SWH 8223.685 Hz  
 FIDRES 0.125483 Hz  
 AQ 3.9845889 sec  
 RG 50.8  
 DW 60.800 usec  
 DE 6.50 usec  
 TE 295.0 K  
 D1 1.00000000 sec

===== CHANNEL f1 =====  
 NUC1 1H  
 P1 16.87 usec  
 PLW1 20.00000000 W  
 SFO1 400.1324710 MHz

F2 - Processing parameters  
 SI 65536  
 SF 400.1300101 MHz  
 WDW EM  
 SSB 0  
 LB 0.30 Hz  
 GB 0  
 PC 1.00

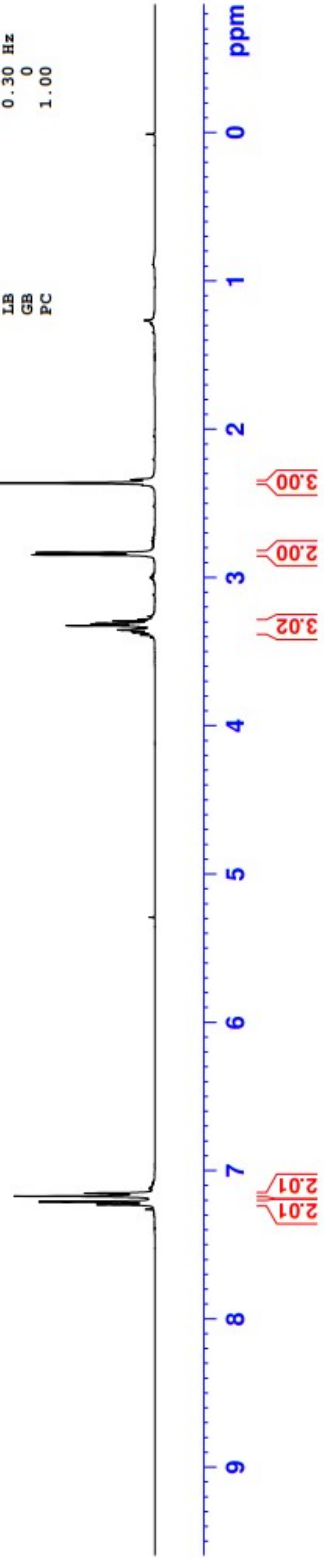

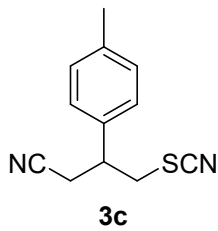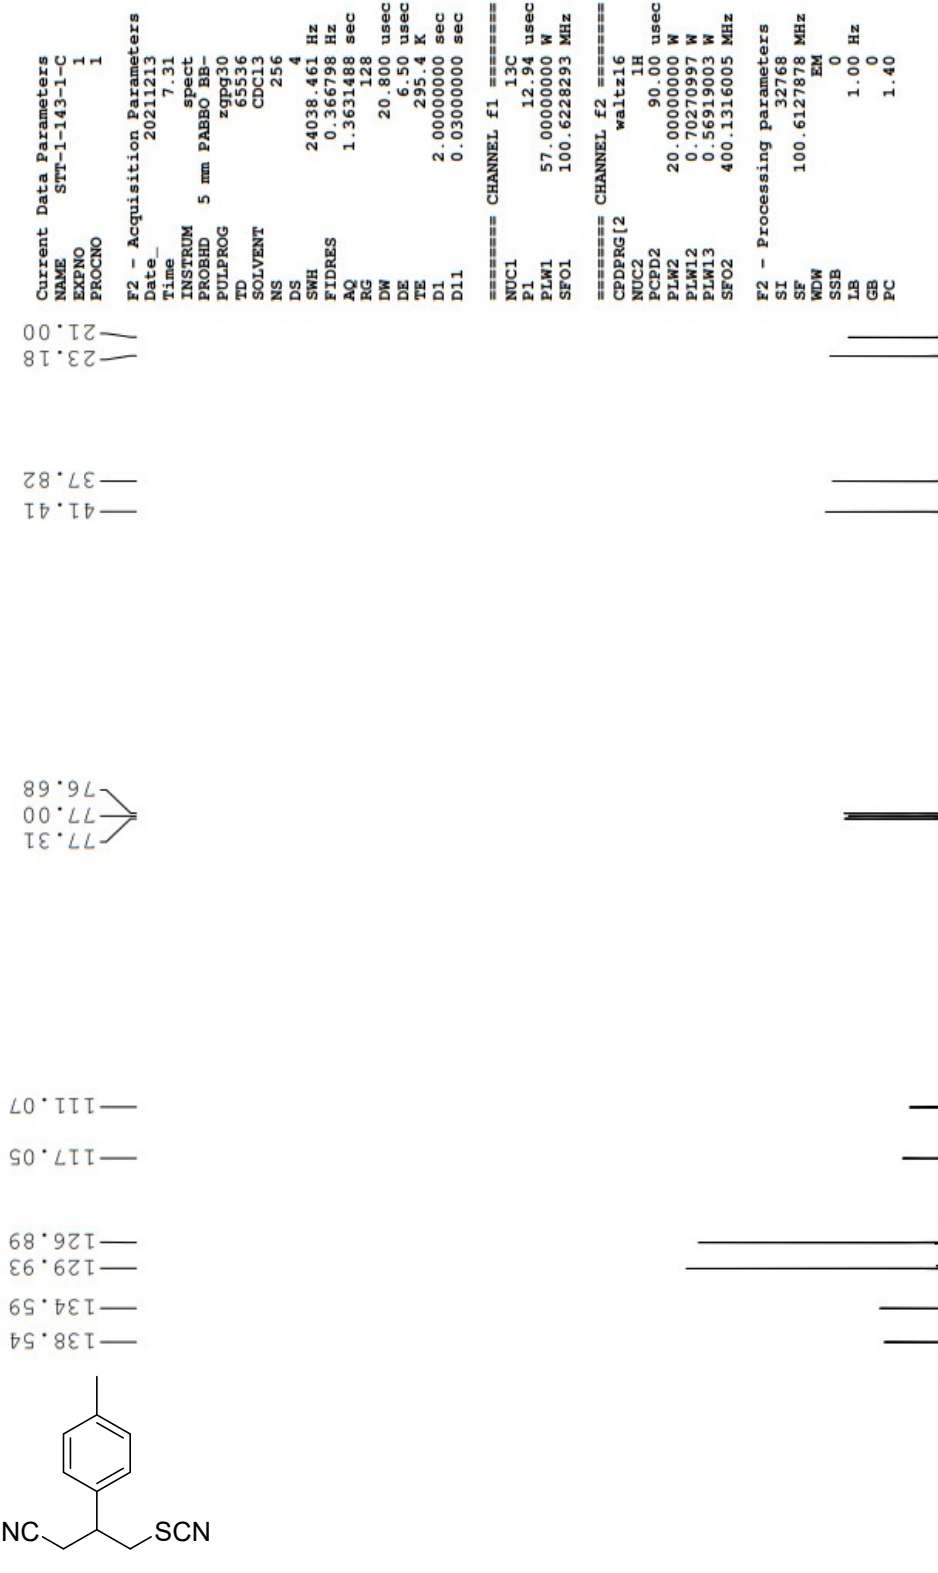

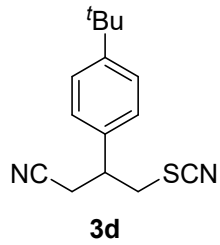

7.43  
7.41  
7.26  
7.21  
7.19

3.41  
3.40  
3.39  
3.39  
3.37  
3.36  
3.34  
3.33  
3.32  
3.22  
2.92  
2.91  
2.88  
2.87  
2.85  
2.83  
2.81

1.32

```

Current Data Parameters
NAME      STT-1-123-1-H
EXPNO    1
PROCNO   1

F2 - Acquisition Parameters
Date_    20211101
Time     7.49
INSTRUM spect
PROBHD   5 mm PABEO BB-
PULPROG zg30
TD       65536
SOLVENT  CDC13
NS       16
DS       2
SWH      8223.685 Hz
FIDRES   0.125483 Hz
AQ       3.984589 sec
RG       71.8
DW       60.800 usec
DE       6.50 usec
TE       298.7 K
D1       1.00000000 sec

===== CHANNEL f1 =====
NUC1     1H
P1       16.87 usec
PLW1     20.0000000 W
SFO1     400.1324710 MHz

F2 - Processing parameters
SI       65536
SF       400.1300099 MHz
WDW      EM
SSB      0
LB       0.30 Hz
GB       0
PC       1.00

```

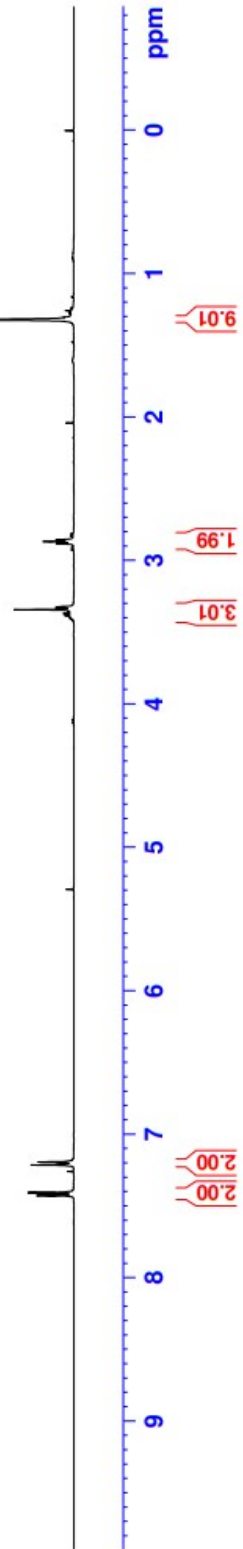

Current Data Parameters  
 NAME SFT-1-123-1-C  
 EXPNO 1  
 PROCNO 1

F2 - Acquisition Parameters  
 Date\_ 20211101  
 Time 17.16  
 INSTRUM spect  
 PROBHD 5 mm PABBO BE-  
 PULPROG zgpg30  
 TD 65536  
 SOLVENT CDCl3  
 NS 256  
 DS 4  
 SWH 24038.461 Hz  
 FIDRES 0.366798 Hz  
 AQ 1.3631488 sec  
 RG 144  
 DW 20.800 usec  
 DE 6.50 usec  
 TE 300.9 K  
 D1 2.00000000 sec  
 D11 0.03000000 sec

==== CHANNEL f1 =====  
 NUC1 13C  
 P1 12.94 usec  
 PLW1 57.0000000 W  
 SF01 100.6228293 MHz

==== CHANNEL f2 =====  
 CPDPRG2 waltz16  
 NUC2 1H  
 PCPD2 90.00 usec  
 PLW2 20.0000000 W  
 PLW12 0.70270997 W  
 PLW13 0.56919003 W  
 SF02 400.1316005 MHz

F2 - Processing parameters  
 SI 32768  
 SF 100.6127772 MHz  
 WDW EM  
 SSB 0  
 LB 1.00 Hz  
 GB 0  
 PC 1.40

— 23.13  
 — 31.17  
 — 34.56  
 — 37.88  
 — 41.33

76.68  
 77.00  
 77.32

— 111.03  
 — 117.04  
 126.27  
 126.73  
 — 134.66  
 — 151.83

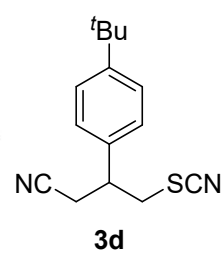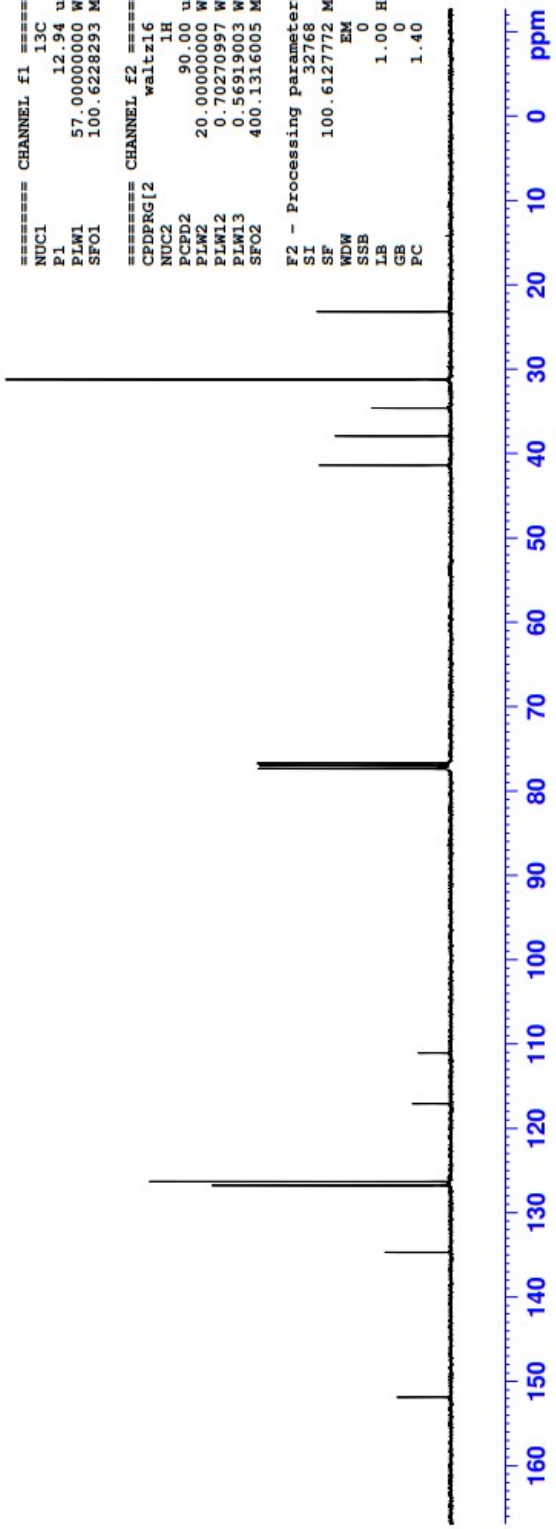

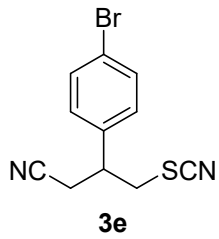

3.41  
3.39  
3.37  
3.36  
3.35  
3.34  
3.32  
3.30  
3.28  
3.27  
2.90  
2.87  
2.86  
2.85  
2.85  
2.85  
2.82

7.16  
7.16  
7.17  
7.18  
7.18  
7.19  
7.26  
7.54  
7.54  
7.55  
7.56  
7.56  
7.57

Current Data Parameters  
 NAME STT-1-123-2-H  
 EXPNO 1  
 PROCNO 1

F2 - Acquisition Parameters  
 Date\_ 20211103  
 Time 15.47  
 INSTRUM spect  
 PROBHD 5 mm PABBO BB-  
 PULPROG zg30  
 TD 65536  
 SOLVENT CDCl3  
 NS 16  
 DS 2  
 SWH 8223.685 Hz  
 FIDRES 0.125483 Hz  
 AQ 3.9845889 sec  
 RG 161  
 DW 60.800 usec  
 DE 6.50 usec  
 TE 298.7 K  
 D1 1.00000000 sec

==== CHANNEL f1 =====  
 NUC1 1H  
 P1 16.87 usec  
 PLW1 20.0000000 W  
 SF01 400.1324710 MHz

F2 - Processing parameters  
 SI 65536  
 SF 400.1300102 MHz  
 WDW EM  
 SSB 0  
 LB 0.30 Hz  
 GB 0  
 PC 1.00

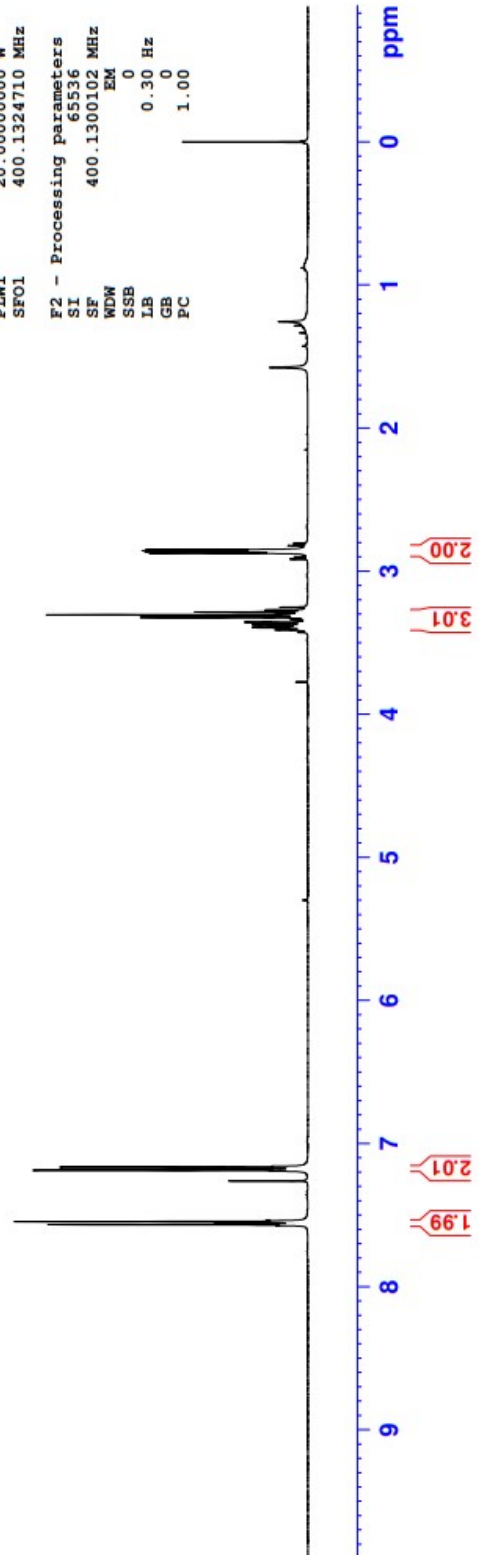

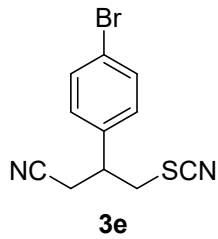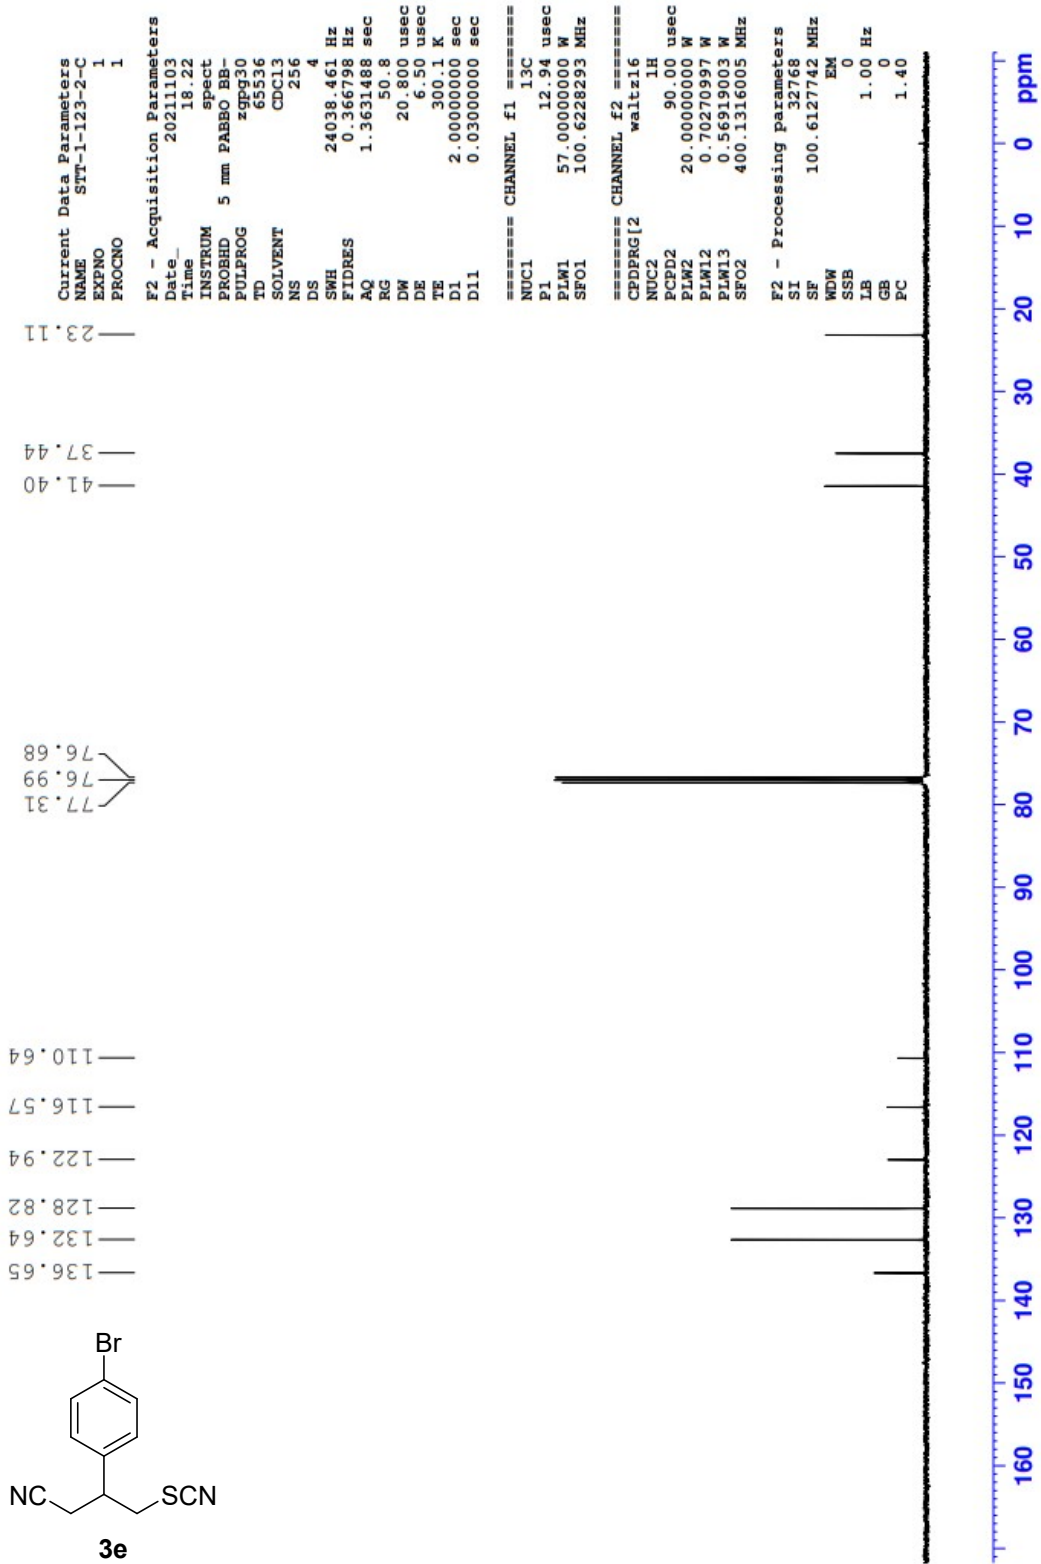



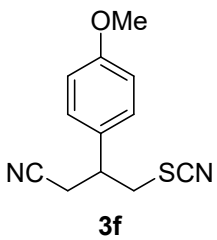

7.26  
7.21  
7.18  
6.94  
6.92

3.81  
3.38  
3.37  
3.36  
3.36  
3.34  
3.33  
3.32  
3.31  
3.31  
3.30  
3.29  
3.28  
2.84  
2.84  
2.83

Current Data Parameters  
 NAME STT-1-152-2-1-H  
 EXPNO 1  
 PROCNO 1

F2 - Acquisition Parameters  
 Date\_ 20220103  
 Time 10.03  
 INSTRUM spect  
 PROBHD 5 mm PABBO BB-  
 PULPROG zg30  
 TD 65536  
 SOLVENT CDCl3  
 NS 16  
 DS 2  
 SWH 8223.685 Hz  
 FIDRES 0.125483 Hz  
 AQ 3.9845889 sec  
 RG 101  
 DW 60.800 usec  
 DE 6.50 usec  
 TE 296.8 K  
 D1 1.00000000 sec

===== CHANNEL f1 =====  
 NUC1 1H  
 P1 16.87 usec  
 PLW1 20.00000000 W  
 SFO1 400.1324710 MHz

F2 - Processing parameters  
 SI 65536  
 SF 400.1300100 MHz  
 WDW EM  
 SSB 0  
 LB 0.30 Hz  
 GB 0  
 PC 1.00

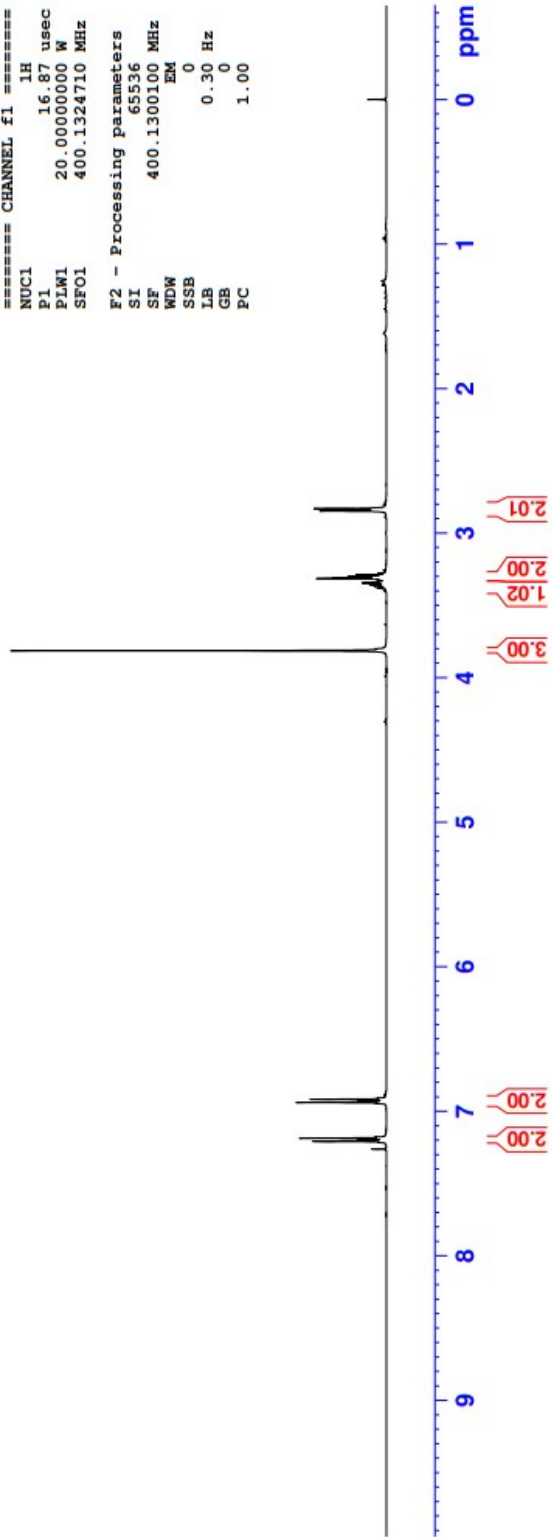



Current Data Parameters  
 NAME STT-1-152-2-1-C  
 EXPNO 1  
 PROCNO 1

F2 - Acquisition Parameters  
 Date\_ 20220103  
 Time 10.20  
 INSTRUM spect  
 PROBHD 5 mm PABBO BB-  
 PULPROG zgpg30  
 TD 6536  
 SOLVENT CDC13  
 NS 256  
 DS 4  
 SWH 24038.461 Hz  
 FIDRES 0.366798 Hz  
 AQ 1.3631488 sec  
 RG 128  
 DW 20.800 usec  
 DE 6.50 usec  
 TE 297.8 K  
 D1 2.00000000 sec  
 D11 0.03000000 sec

==== CHANNEL f1 =====  
 NUC1 13C  
 P1 12.94 usec  
 PLW1 57.0000000 W  
 SFO1 100.6228293 MHz

==== CHANNEL f2 =====  
 CPDPRG[2 waltz16  
 NUC2 1H  
 P1 90.00 usec  
 PLW2 20.0000000 W  
 PLW12 0.70270997 W  
 PLW13 0.56919003 W  
 SFO2 400.1316005 MHz

F2 - Processing parameters  
 SI 32768  
 SF 100.6127779 MHz  
 WDW EM  
 SSB 0  
 LB 1.00 Hz  
 GB 0  
 PC 1.40

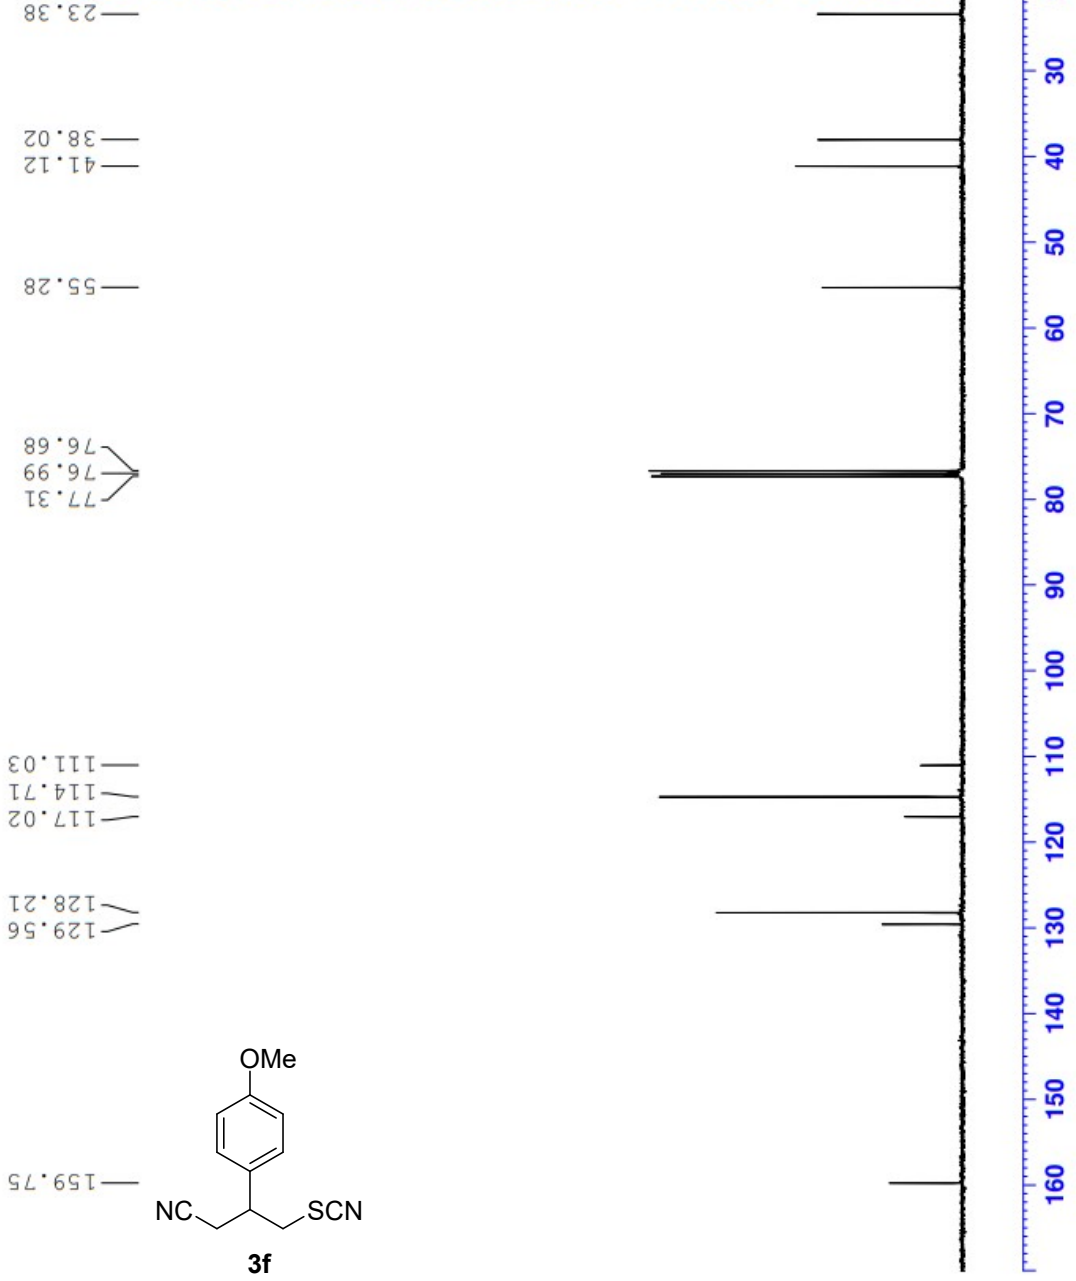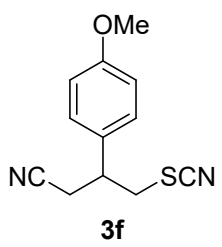

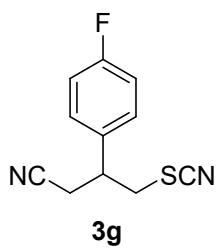

7.295  
 7.291  
 7.282  
 7.274  
 7.262  
 7.139  
 7.133  
 7.118  
 7.101  
 7.096

3.453  
 3.436  
 3.418  
 3.401  
 3.385  
 3.361  
 3.343  
 3.327  
 3.314  
 3.311  
 3.294  
 3.281  
 3.261  
 2.921  
 2.904  
 2.878  
 2.878  
 2.870  
 2.861  
 2.856  
 2.828  
 2.813

Current Data Parameters  
 NAME GWX-1-108-1-1-H  
 EXPNO 1  
 PROCNO 1  
 F2 - Acquisition Parameters  
 Date\_ 20231223  
 Time 17.04  
 INSTRUM spect  
 PROBHD 5 mm PABBO BE-  
 PULPROG zg30  
 TD 65536  
 SOLVENT CDCl3  
 NS 16  
 DS 4  
 SWH 8223.695 Hz  
 FIDRES 0.155483 Hz  
 AQ 3.9845889 sec  
 RG 161  
 DW 60.800 use  
 DE 6.50 use  
 TE 295.7 K  
 D1 1.00000000 sec  
 ===== CHANNEL f1 =====  
 NUC1 1H  
 P1 19.66 use  
 PLW1 20.00000000 W  
 SFO1 400.1324710 MHz  
 F2 - Processing Parameters  
 SI 65536  
 SF 400.1300930 MHz  
 WDW EM  
 SSB 0  
 LB 0.30 Hz  
 GB 0  
 PC 1.00

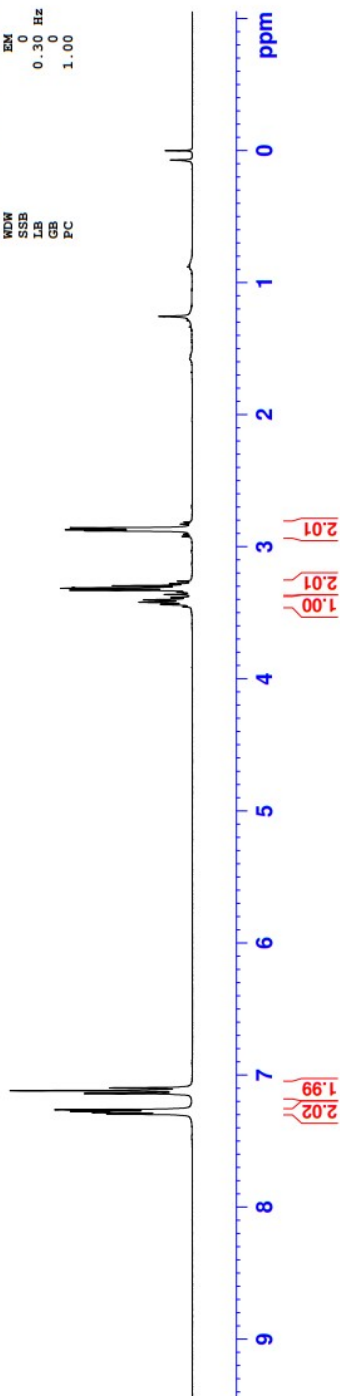

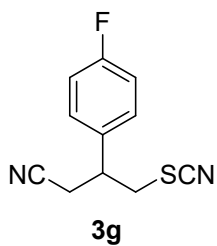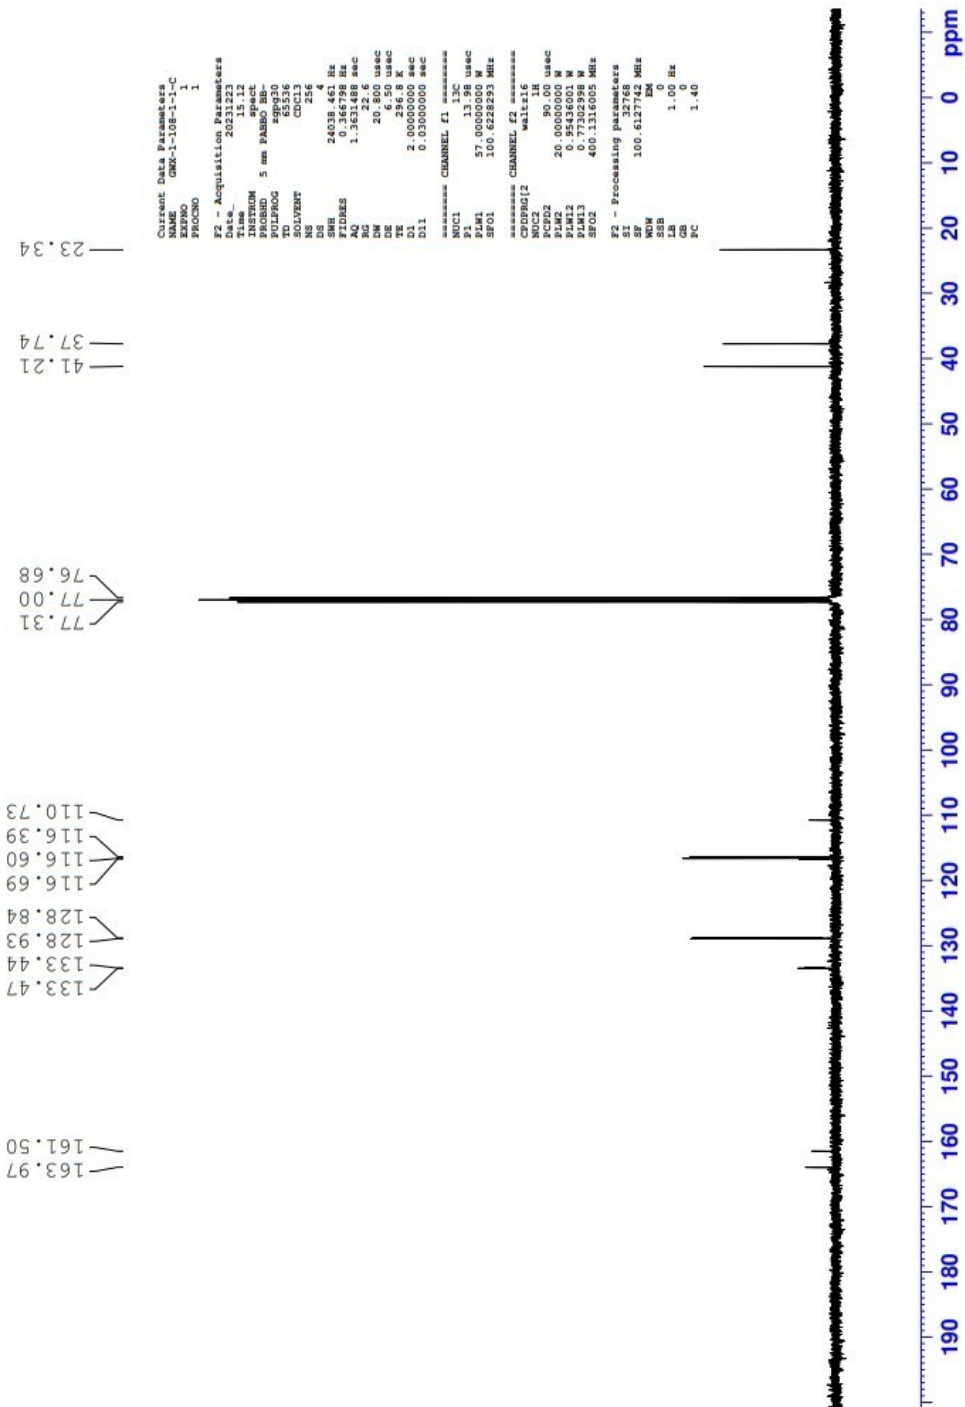

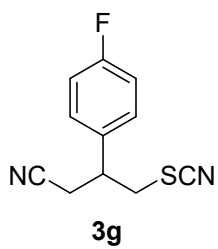

-112.33

```

Current Data Parameters
NAME      GWX-1-108-1-1-F
EXPNO     1
PROCNO    1

F2 - Acquisition Parameters
Date_     20121223
Time      14.55
INSTRUM   spect
PROBHD    5 mm PABBO BB
PULPROG   zgpg30m
TD         131072
SOLVENT   CDCl3
NS         16
DS         4
SWH        89285.711 Hz
FIDRES     0.681196 Hz
AQ         0.7340032 sec
RG         203
DW         5.600 use
DE         6.50 use
TE         296.2 K
D1         1.00000000 sec
D11        0.03000000 sec
D12        0.00002000 sec

===== CHANNEL f1 =====
NUC1       19F
P1         21.80 use
PLW1       18.19700050 W
SFO1       376.4607164 MHz

===== CHANNEL f2 =====
CPDPRG2    waltz16
NUC2
PCPD2
PLW2       90.00 use
PLW2       20.00000000 W
PLW2       0.95436001 W
SFO2       400.1316005 MHz

F2 - Processing parameters
SI         65536
SF         376.4983660 MHz
WDW        EM
SSB        0
LB         0.30 Hz
GB         0
PC         1.00
  
```

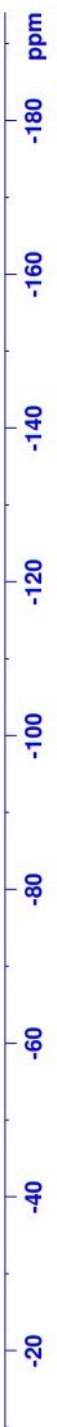

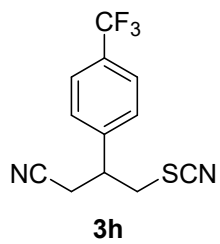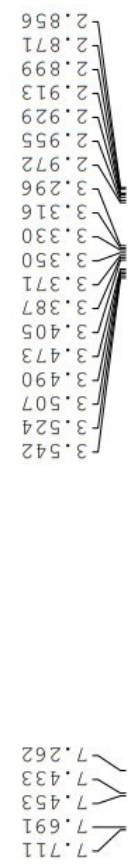

Current Data Parameters  
 NAME GWX-1-111-2-1-H  
 EXPNO 1  
 PROCNO 1  
 F2 - Acquisition Parameters  
 Date\_ 20231228  
 Time 15:23  
 PROGRAM spect  
 PULPROG 5 mm PABBO E2  
 TD 65536  
 SFO 400.1324710 MHz  
 SOLVENT CDCl3  
 NS 16  
 DS 2  
 SWH 8223.685 Hz  
 FIDRES 0.125483 Hz  
 AQ 3.9845889 sec  
 RG 181  
 DW 60.800 use  
 DE 6.50 use  
 TE 296.4 K  
 D1 1.0000000 sec  
 CHANNEL f1  
 NUC1 1H  
 P1 19.66 use  
 PLW1 20.0000000 W  
 SFO1 400.1324710 MHz  
 F2 - Processing parameters  
 SI 65536  
 SF 400.1300094 MHz  
 WDW EM  
 SSB 0  
 LB 0.30 Hz  
 GB 0  
 PC 1.00

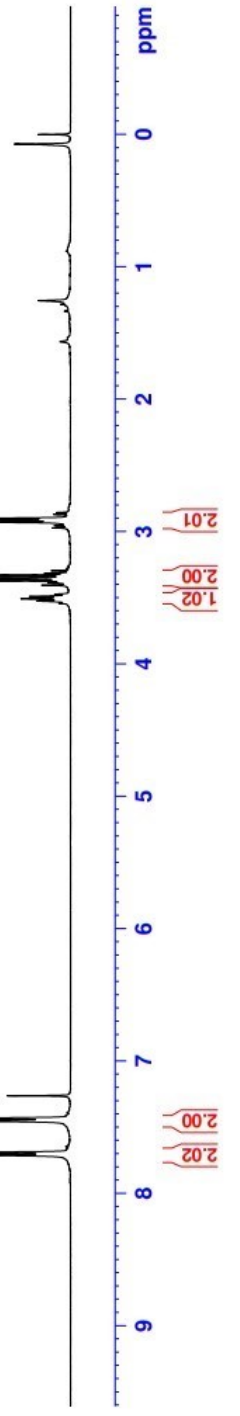

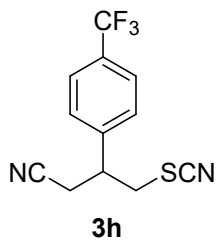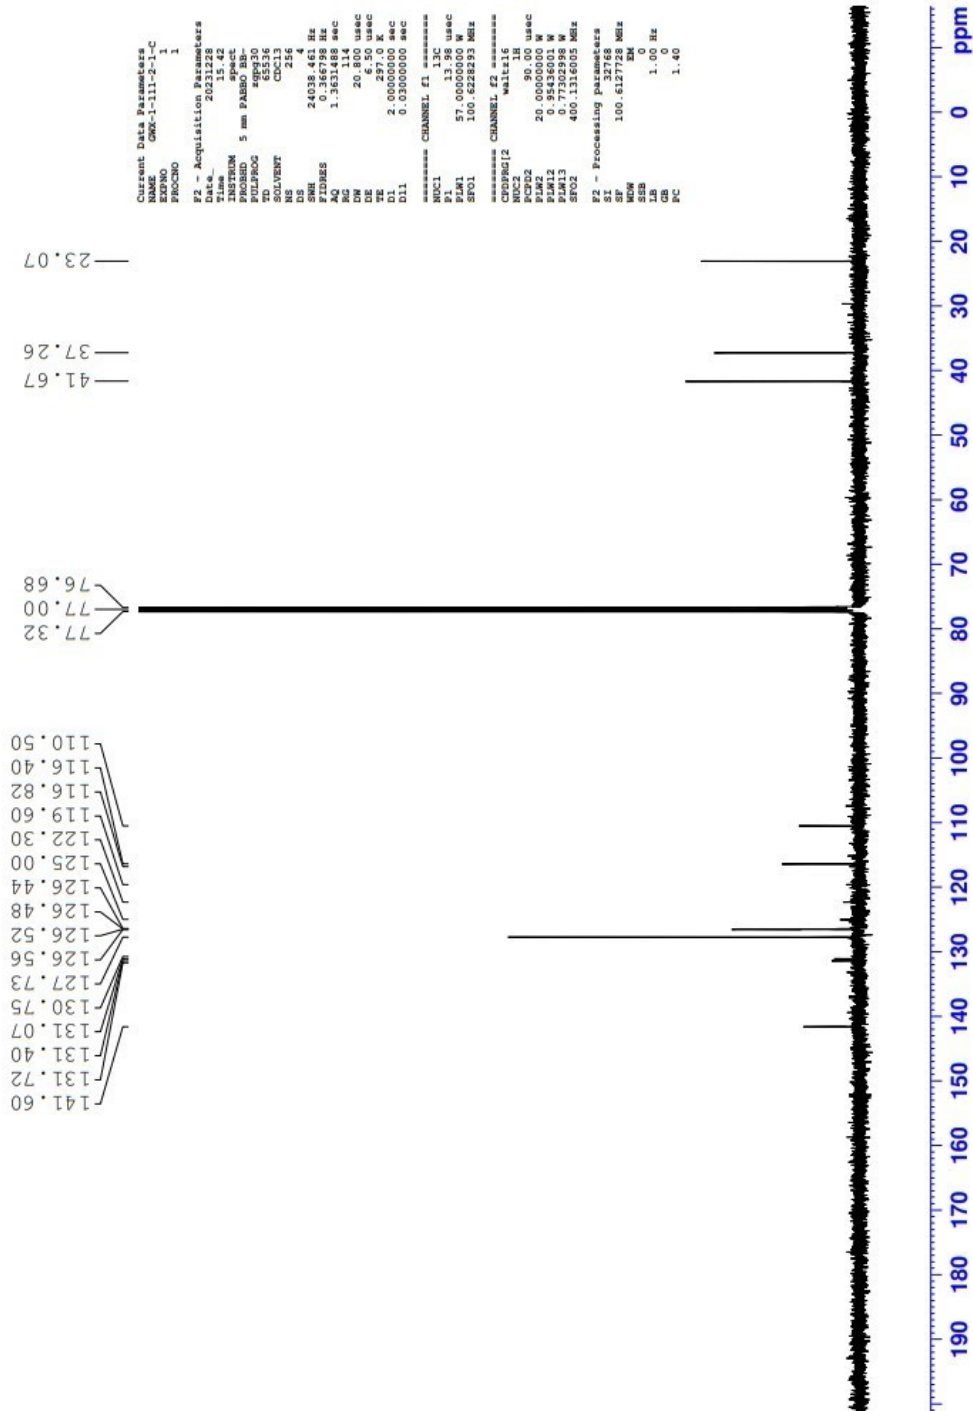

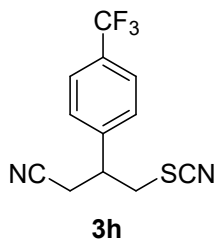

-62.79

```

Current Data Parameters
NAME      GWX-1-111-2-1-F
EXPNO     1
PROCNO    1

F2 - Acquisition Parameters
Date_     20231228
Time      15.25
INSTRUM   spect
PROBHD    5 mm PABBO BB-
PULPROG   zgpg30
TD         131072
SOLVENT    CDCl3
NS         16
DS         4
SMH        89285.711 Hz
FIDRES     0.681196 Hz
AQ          0.7340032 sec
RG          203
DE          5.600 use
TE          296.5 K
D1          1.00000000 sec
D11         0.03000000 sec
D12         0.00002000 sec

===== CHANNEL f1 =====
NUC1       19F
P1         21.80 use
PLW1       18.19700050 W
SFO1       376.4607164 MHz

===== CHANNEL f2 =====
CPDPRG2    waltz16
NUC2       1H
PCPD2      90.00 use
PLW2       20.00000000 W
PLW12      0.95436001 W
SFO2       400.1316005 MHz

F2 - Processing parameters
SI          65536
SF          376.4983660 MHz
WDW         EM
SSB         0
LB          0.30 Hz
GB          0
PC          1.00
  
```

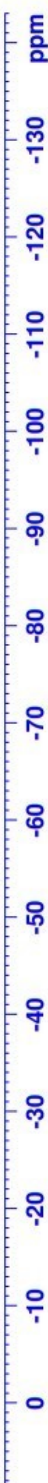

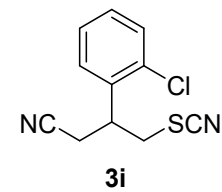

7.47  
7.47  
7.46  
7.45  
7.37  
7.36  
7.35  
7.35  
7.34  
7.34  
7.32  
7.31  
7.30  
7.30  
7.26

4.05  
4.03  
4.01  
3.99  
3.98  
3.48  
3.47  
3.45  
3.43  
3.38  
3.36  
3.35  
3.33  
3.02  
3.00  
2.97  
2.96  
2.95  
2.92  
2.90  
2.88  
2.86

Current Data Parameters  
 NAME STT-1-122-1-H  
 EXPNO 1  
 PROCNO 1

F2 - Acquisition Parameters  
 Date\_ 20211101  
 Time 7.56  
 INSTRUM spect  
 PROBHD 5 mm PABBO BR-  
 PULPROG zg30  
 TD 65536  
 SOLVENT CDCl3  
 NS 16  
 DS 2  
 SWH 8223.685 Hz  
 FIDRES 0.125483 Hz  
 AQ 3.9845889 sec  
 RG 90.5  
 DW 60.800 usec  
 DE 6.50 usec  
 TE 298.7 K  
 D1 1.00000000 sec

==== CHANNEL f1 =====  
 NUC1 1H  
 P1 16.87 usec  
 PL1 20.00000000 W  
 SF01 400.1324710 MHz

F2 - Processing parameters  
 SI 65536  
 SF 400.1300099 MHz  
 WDW EM  
 SSB 0  
 LB 0.30 Hz  
 GB 0  
 PC 1.00

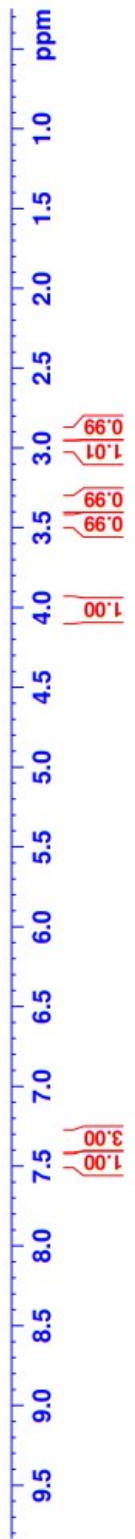



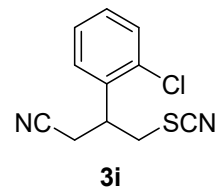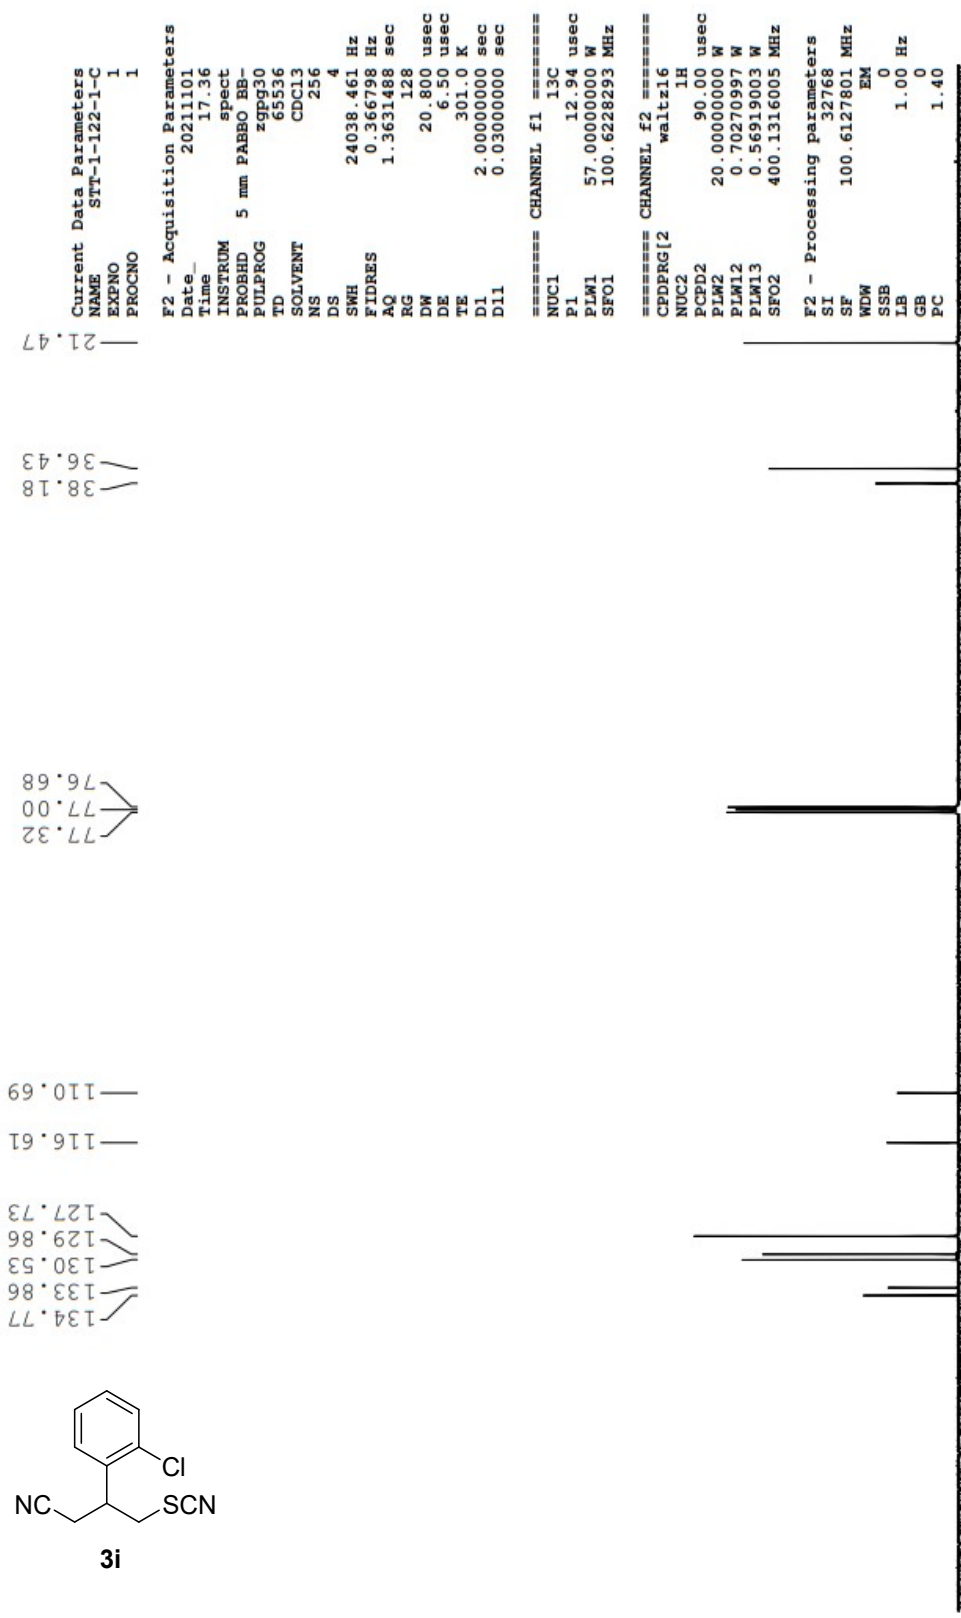

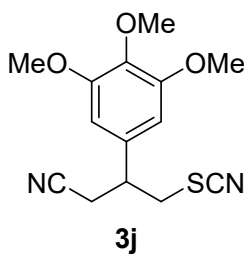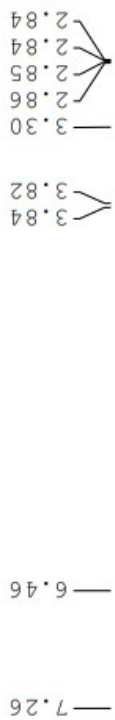

Current Data Parameters  
 NAME STT-1-151-1-1-H  
 EXPNO 1  
 PROCNO 1

F2 - Acquisition Parameters  
 Date\_ 20211224  
 Time 17.03  
 INSTRUM spect  
 PROBHD 5 mm PABBO BB-  
 PULPROG zg30  
 TD 65536  
 SOLVENT CDCl3  
 NS 16  
 DS 2  
 SWH 8223.685 Hz  
 FIDRES 0.125483 Hz  
 AQ 3.9845889 sec  
 RG 57  
 DW 60.800 usec  
 DE 6.50 usec  
 TE 296.8 K  
 D1 1.00000000 sec

===== CHANNEL f1 =====  
 NUC1 1H  
 P1 16.87 usec  
 PLW1 20.0000000 W  
 SF01 400.1324710 MHz

F2 - Processing parameters  
 SI 65536  
 SF 400.1300101 MHz  
 WDW EM  
 SSB 0  
 LB 0.30 Hz  
 GB 0  
 PC 1.00

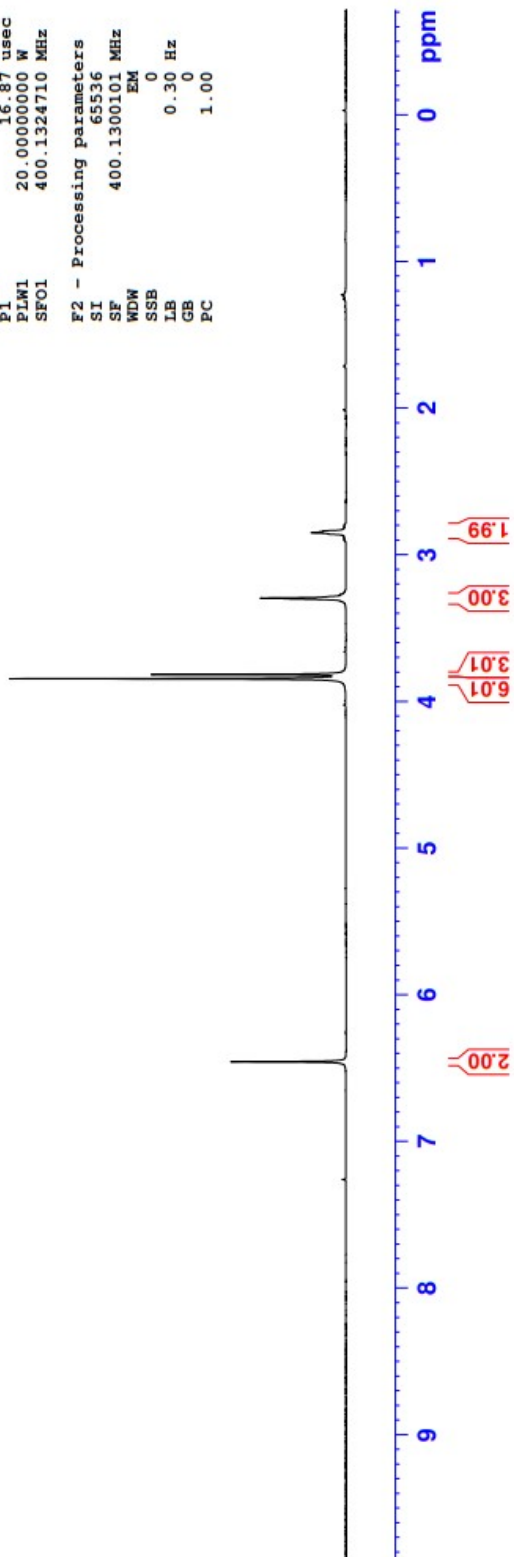

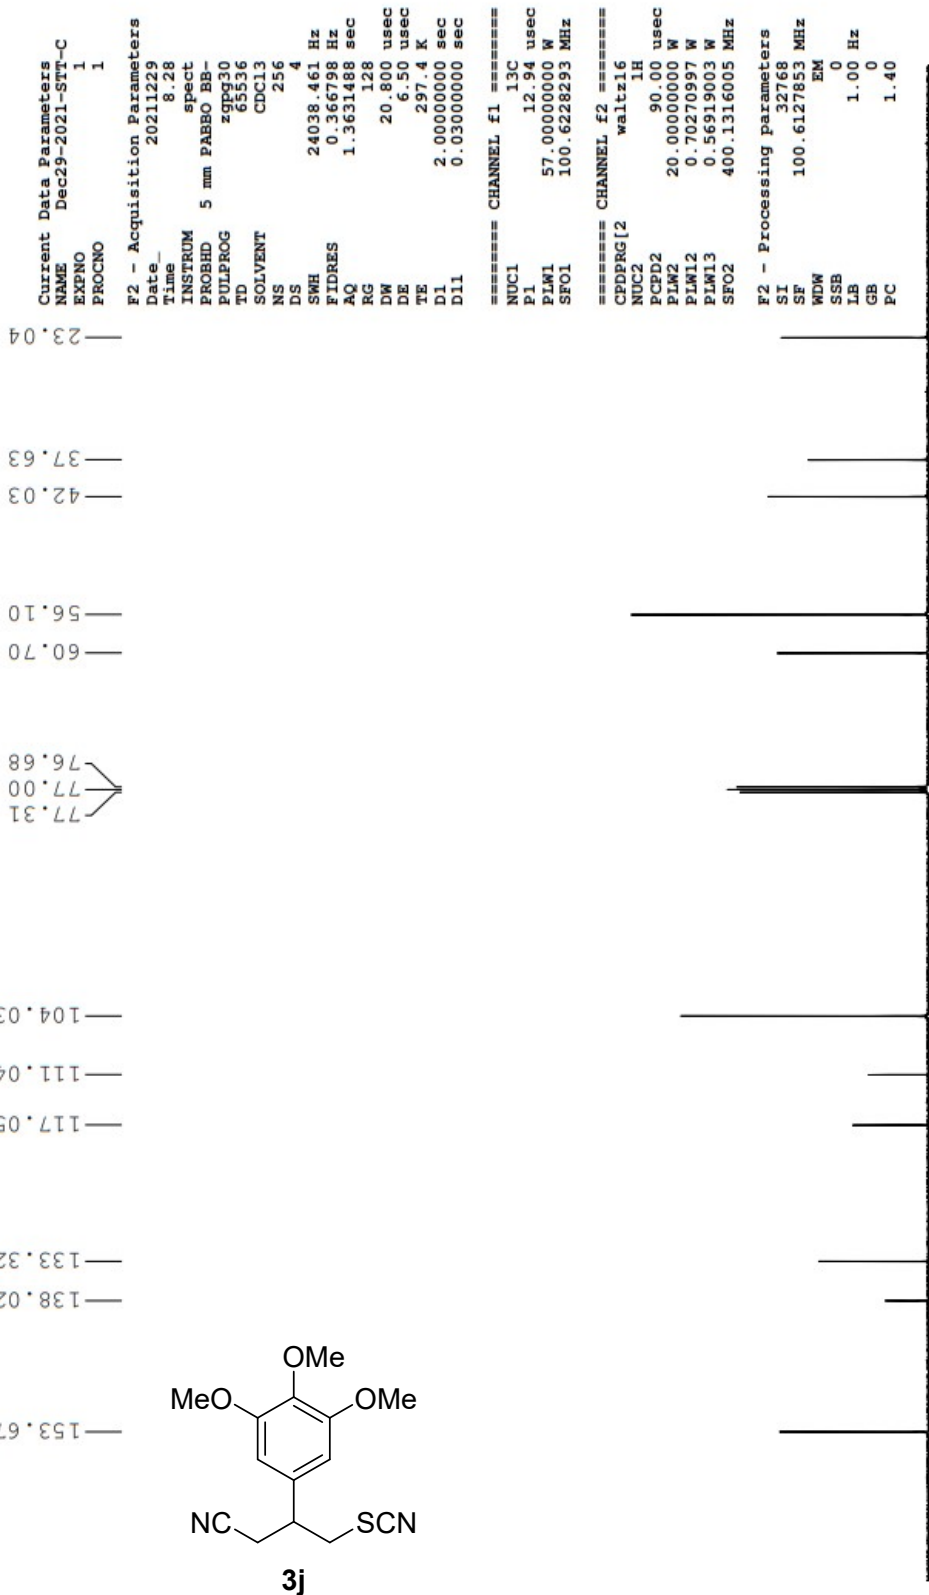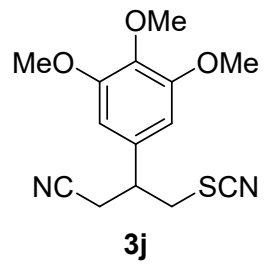

2.95  
 2.96  
 2.96  
 2.97  
 2.98  
 3.42  
 3.45  
 3.55  
 3.57  
 3.58  
 3.60  
 3.62

7.26  
 7.35  
 7.37  
 7.51  
 7.53  
 7.54  
 7.55  
 7.56  
 7.76  
 7.85  
 7.86  
 7.86  
 7.87  
 7.90  
 7.92

Current Data Parameters  
 NAME STT-1-126-1-2-H  
 EXPNO 1  
 PROCNO 1  
  
 F2 - Acquisition Parameters  
 Date\_ 20211109  
 Time\_ 8.20  
 INSTRUM spect  
 PROBHD 5 mm PABBO BB-  
 PULPROG zg30  
 TD 65536  
 SOLVENT CDCl3  
 NS 16  
 DS 2  
 SWH 8223.685 Hz  
 FIDRES 0.125483 Hz  
 AQ 3.9845889 sec  
 RG 161  
 DW 60.800 usec  
 DE 6.50 usec  
 TE 295.9 K  
 D1 1.00000000 sec  
  
 ===== CHANNEL f1 =====  
 NUC1 1H  
 P1 16.87 usec  
 PLW1 20.0000000 W  
 SF01 400.1324710 MHz  
  
 F2 - Processing parameters  
 SI 65536  
 SF 400.1300102 MHz  
 WDW EM  
 SSB 0  
 LB 0.30 Hz  
 GB 0  
 PC 1.00

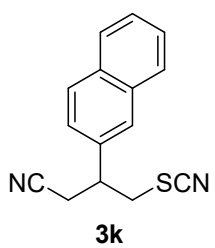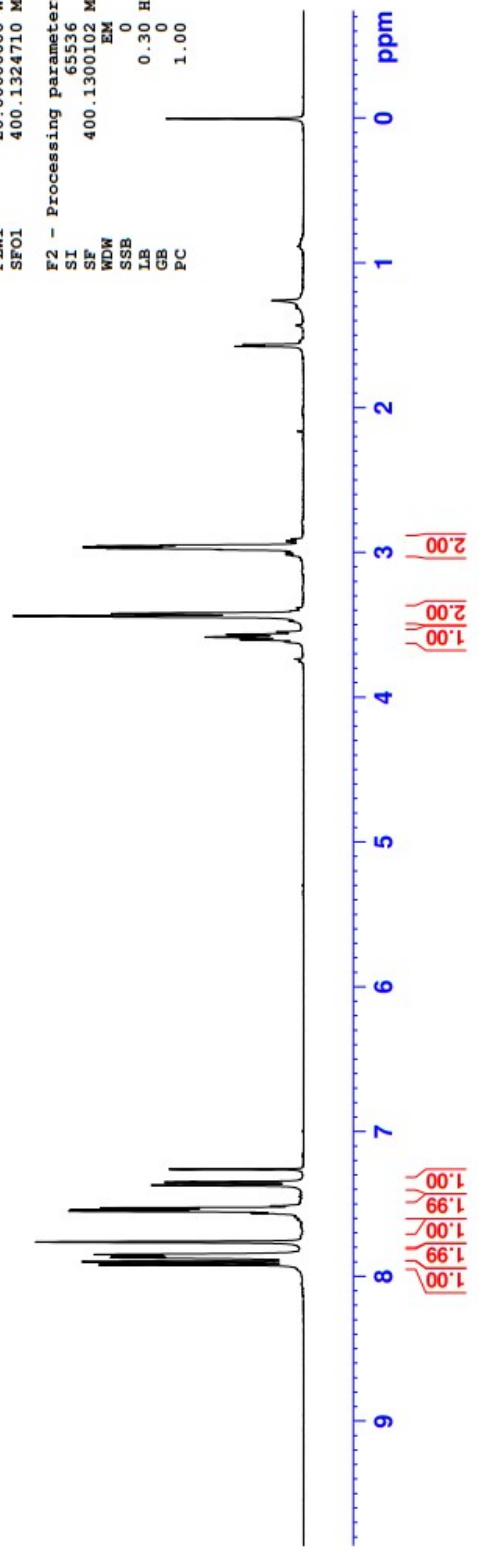

Current Data Parameters  
 NAME STT-1-126-1-2-C  
 EXPNO 1  
 PROCNO 1

F2 - Acquisition Parameters  
 Date\_ 20211110  
 Time 9.01  
 INSTRUM spect  
 PROBHD 5 mm PABBO BB-  
 PULPROG zgpg30  
 TD 65536  
 SOLVENT CDCl3  
 NS 256  
 DS 4  
 SWH 24038.461 Hz  
 FIDRES 0.366798 Hz  
 AQ 1.3631488 sec  
 RG 101  
 DW 20.800 usec  
 DE 6.50 usec  
 TE 298.0 K  
 D1 2.00000000 sec  
 D11 0.03000000 sec

=====  
 CHANNEL f1  
 NUC1 13C  
 P1 12.94 usec  
 PLW1 57.0000000 W  
 SFO1 100.6228293 MHz

=====  
 CHANNEL f2  
 CPDPRG2 waltz16  
 NUC2 1H  
 PCPD2 90.00 usec  
 PLW2 20.0000000 W  
 PLW12 0.70270997 W  
 PLW13 0.56919003 W  
 SFO2 400.1316005 MHz

F2 - Processing parameters  
 SI 32768  
 SF 100.6127743 MHz  
 WDW EM  
 SSB 0  
 LB 1.00 Hz  
 GB 0  
 PC 1.40

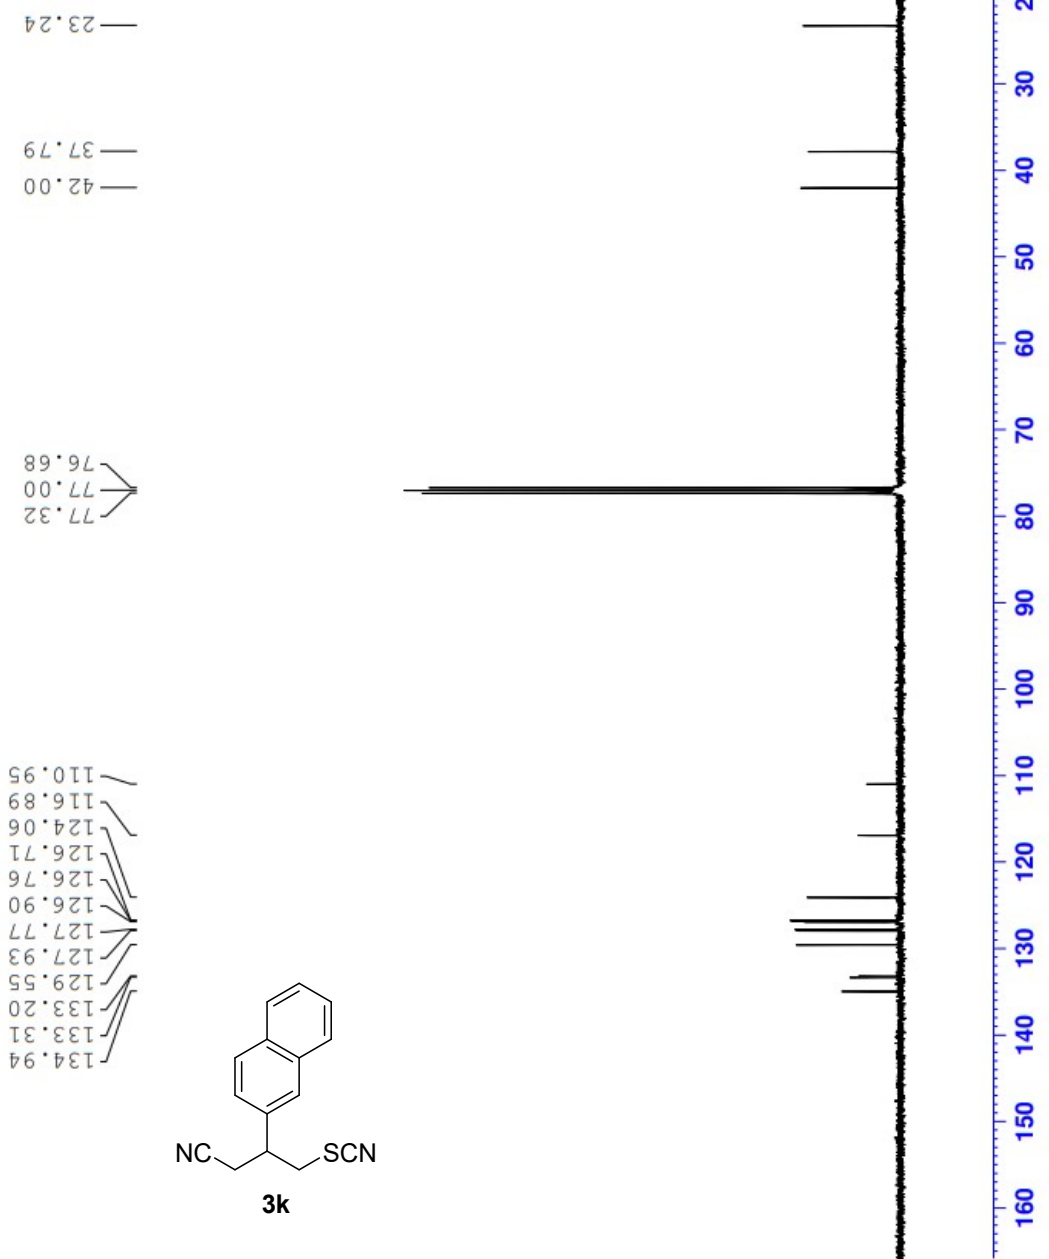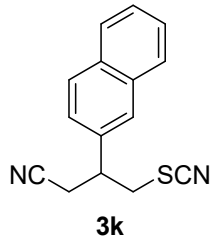

0.86  
0.87  
0.89  
1.25  
1.29  
1.33  
1.35  
1.36  
1.49  
1.50  
1.53  
1.54  
1.56  
1.58  
1.60  
1.63  
1.64  
1.65  
1.66  
1.66  
1.85  
1.87  
1.89  
1.91  
1.91  
3.12  
3.13  
3.15  
3.16

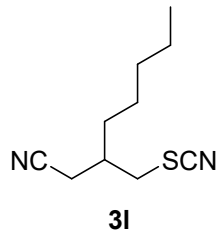

7.26

Current Data Parameters  
NAME STT-1-136-1-H  
EXPNO 1  
PROCNO 1

F2 - Acquisition Parameters  
Date\_ 20211125  
Time 9.12  
INSTRUM spect  
PROBHD 5 mm PABBO BB-  
PULPROG zg30  
TD 65536  
SOLVENT CDC13  
NS 16  
DS 2  
SWH 8223.685 Hz  
FIDRES 0.125483 Hz  
AQ 3.9845889 sec  
RG 32  
DW 60.800 usec  
DE 6.50 usec  
TE 295.2 K  
D1 1.00000000 sec

==== CHANNEL f1 =====  
NUC1 LH  
P1 16.87 usec  
PLW1 20.00000000 W  
SF01 400.1324710 MHz

F2 - Processing parameters  
SI 65536  
SF 400.1300098 MHz  
WDW EM  
SSB 0  
LB 0.30 Hz  
GB 0  
PC 1.00

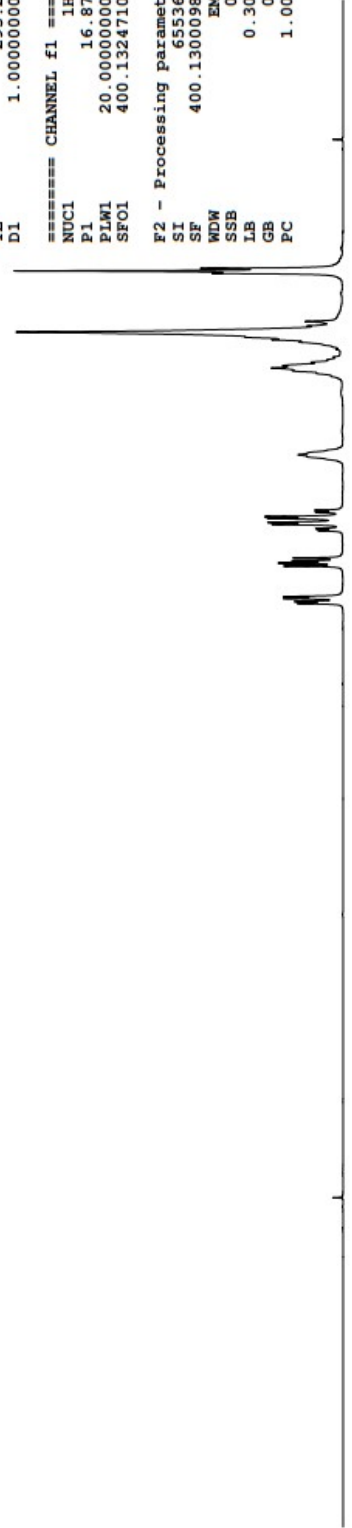

9 8 7 6 5 4 3 2 1 0 ppm

Current Data Parameters  
 NAME STI-1-136-1-C  
 EXPNO 1  
 PROCNO 1

F2 - Acquisition Parameters  
 Date\_ 20211129  
 Time\_ 7.53  
 INSTRUM spect  
 PROBHD 5 mm PABBO BB-  
 PULPROG zgpg30  
 TD 65536  
 SOLVENT CDCl3  
 NS 256  
 DS 4  
 SWH 24038.461 Hz  
 FIDRES 0.366798 Hz  
 AQ 1.3631488 sec  
 RG 128  
 DW 20.800 usec  
 DE 6.50 usec  
 TE 298.3 K  
 D1 2.00000000 sec  
 D11 0.03000000 sec

==== CHANNEL f1 =====  
 NUC1 13C  
 P1 12.94 usec  
 PLW1 57.0000000 W  
 SFO1 100.6228293 MHz

==== CHANNEL f2 =====  
 CDPGRG[2] waitz16  
 NOC2 1H  
 PCPD2 90.00 usec  
 PLW2 20.0000000 W  
 PLW12 0.70270997 W  
 PLW13 0.56919003 W  
 SFO2 400.1316005 MHz

F2 - Processing parameters  
 SI 32768  
 SF 100.6127926 MHz  
 EM  
 WDW 0  
 SSB 1.00 Hz  
 LB 0  
 GB 0  
 PC 1.40

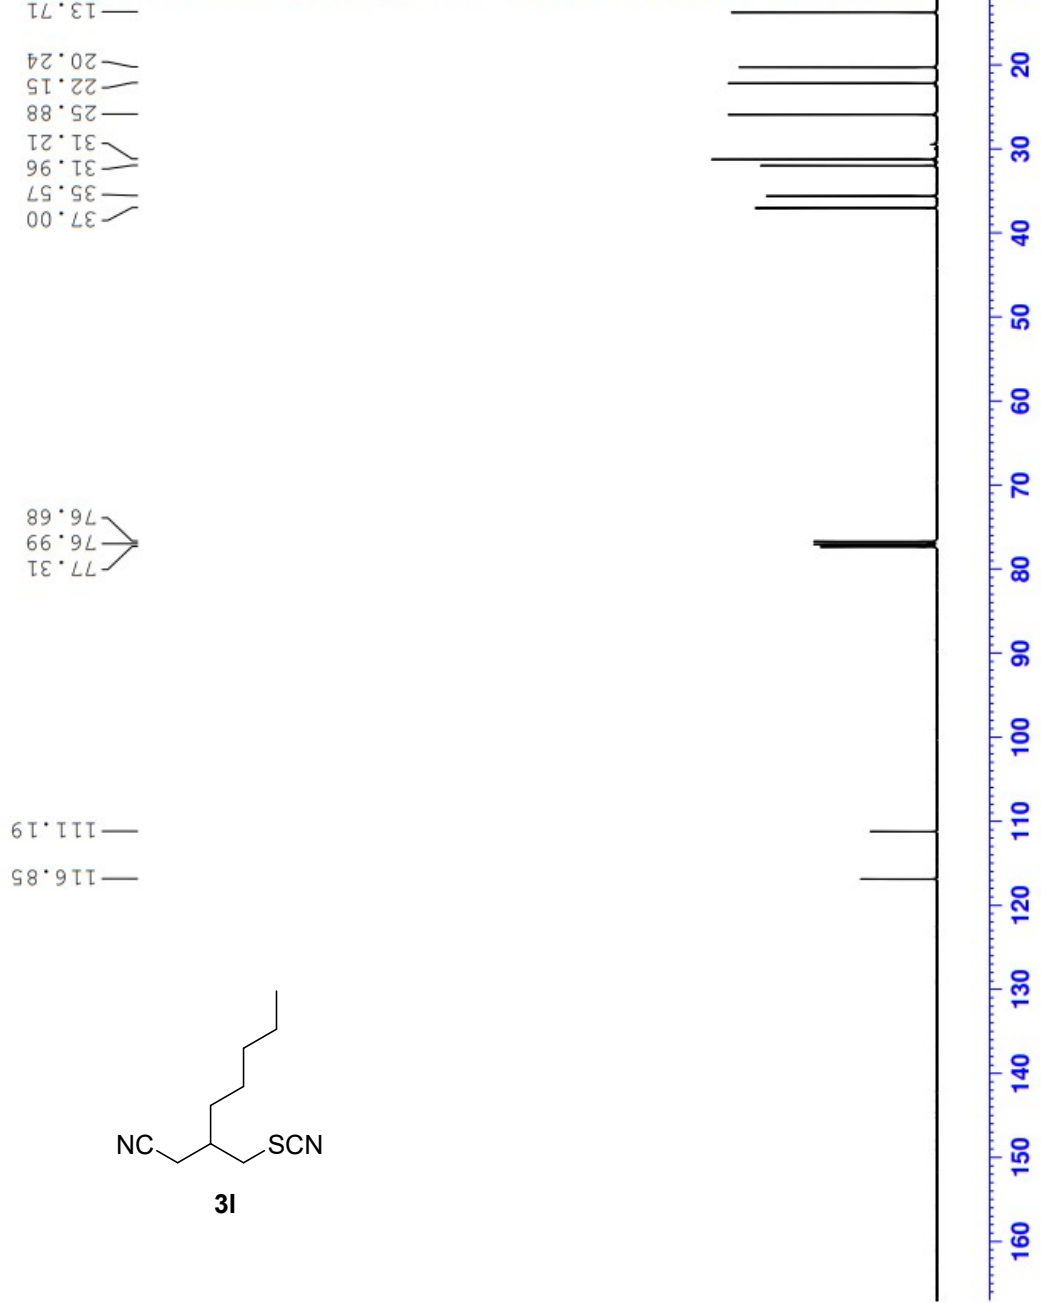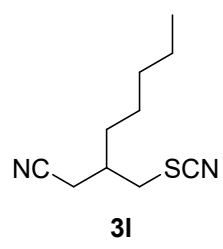



7.37  
7.35  
7.33  
7.30  
7.29  
7.28  
7.27  
7.26  
7.25  
7.25  
7.24  
7.24  
7.21  
7.19  
7.17  
3.15  
3.14  
3.00  
2.99  
2.97  
2.95  
2.95  
2.93  
2.91  
2.85  
2.80  
2.78  
2.77  
2.75  
2.73  
2.64  
2.62  
2.59  
2.58  
2.52  
2.50  
2.50  
2.48  
2.47  
2.46  
2.44  
2.42  
2.40  
2.36  
1.34  
1.32  
1.31  
1.30  
1.29  
1.28  
1.25  
0.88  
0.88  
0.86  
0.07  
0.00

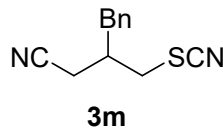

Current Data Parameters  
 NAME STT-1-137-2-1-H  
 EXPNO 1  
 PROCNO 1

F2 - Acquisition Parameters  
 Date\_ 20211208  
 Time 8.20  
 INSTRUM spect  
 PROBHD 5 mm PABBO BB-  
 PULPROG zg30  
 TD 65536  
 SOLVENT CDCl3  
 NS 16  
 DS 2  
 SWH 8223.685 Hz  
 FIDRES 0.125483 Hz  
 AQ 3.9845889 sec  
 RG 50.8  
 DW 60.800 usec  
 DE 6.50 usec  
 TE 294.9 K  
 D1 1.00000000 sec

==== CHANNEL f1 =====  
 NUC1 1H  
 P1 16.87 usec  
 PLW1 20.00000000 W  
 SFO1 400.1324710 MHz

F2 - Processing parameters  
 SI 65536  
 SF 400.1300127 MHz  
 WDW EM  
 SSB 0  
 LB 0.30 Hz  
 GB 0  
 PC 1.00

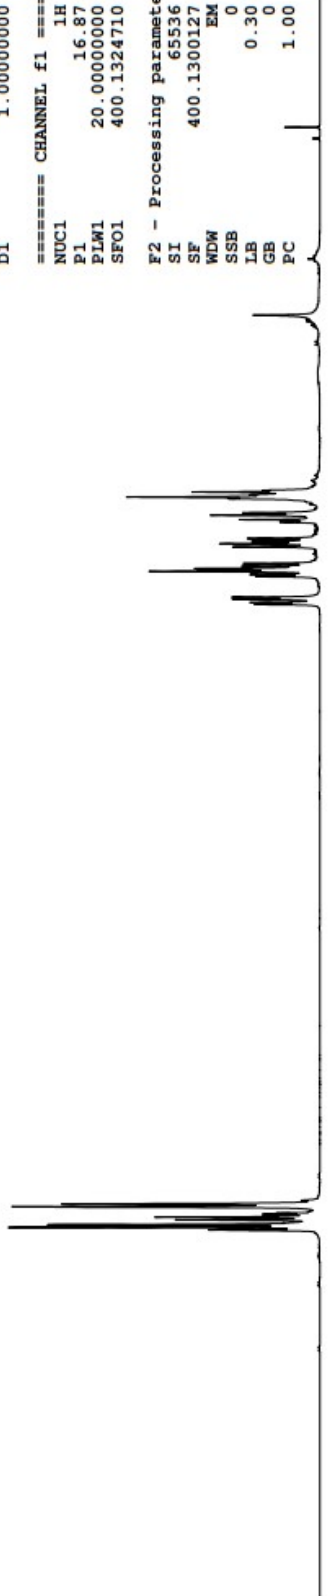

2.00  
1.03  
2.01

0.98  
2.01  
1.01  
1.01  
1.01  
2.00

ppm



Current Data Parameters  
 NAME STT-1-137-2-C  
 EXPNO 1  
 PROCNO 1  
 19.80

36.42  
 37.55  
 38.08

76.68  
 77.00  
 77.32

111.02  
 116.73

127.15  
 128.75  
 128.88  
 136.49

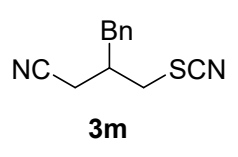

F2 - Acquisition Parameters  
 Date\_ 20211130  
 Time 8.49  
 INSTRUM spect  
 PROBHD 5 mm PABBO BB-  
 PULPROG zgpg30  
 TD 65536  
 SOLVENT CDC13  
 NS 256  
 DS 4  
 SWH 24038.461 Hz  
 FIDRES 0.366798 Hz  
 AQ 1.3631488 sec  
 RG 128  
 DW 20.800 usec  
 DE 6.50 usec  
 TE 296.6 K  
 D1 2.00000000 sec  
 D11 0.03000000 sec

==== CHANNEL f1 =====  
 NUC1 13C  
 P1 12.94 usec  
 PLW1 57.0000000 W  
 SFO1 100.6228293 MHz

==== CHANNEL f2 =====  
 CPDPRG[2] waltz16  
 NUC2 1H  
 P1 90.00 usec  
 PLW2 20.0000000 W  
 PLW12 0.70270997 W  
 PLW13 0.56919003 W  
 SFO2 400.1316005 MHz

F2 - Processing parameters  
 SI 32768  
 SF 100.6127948 MHz  
 WDW EM  
 SSB 0  
 LB 1.00 Hz  
 GB 0  
 PC 1.40

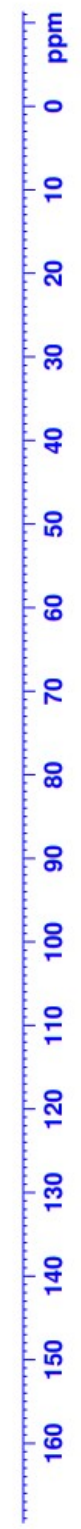

0.00

4.66  
4.01  
4.00  
3.98  
3.97  
3.96  
3.20  
3.19  
3.17  
3.15  
3.14  
3.12  
3.10  
2.70  
2.69  
2.68

7.38  
7.37  
7.36  
7.35  
7.33

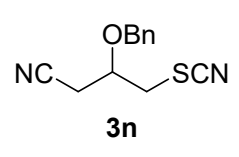

Current Data Parameters  
NAME STT-1-132-2-H  
EXPNO 1  
PROCNO 1

F2 - Acquisition Parameters  
Date\_ 20211122  
Time 7.54  
INSTRUM spect  
PROBHD 5 mm PABBO BB-  
PULPROG zg30  
TD 65536  
SOLVENT CDC13  
NS 16  
DS 2  
SWH 8223.685 Hz  
FIDRES 0.125483 Hz  
AQ 3.9845689 sec  
RG 32  
DW 60.800 usec  
DE 6.50 usec  
TE 294.9 K  
D1 1.00000000 sec

===== CHANNEL f1 =====  
NUC1 1H  
P1 16.87 usec  
PLW1 20.00000000 W  
SF01 400.1324710 MHz

F2 - Processing parameters  
SI 65536  
SF 400.1300160 MHz  
WDW EM  
SSB 0  
LB 0.30 Hz  
GB 0  
PC 1.00

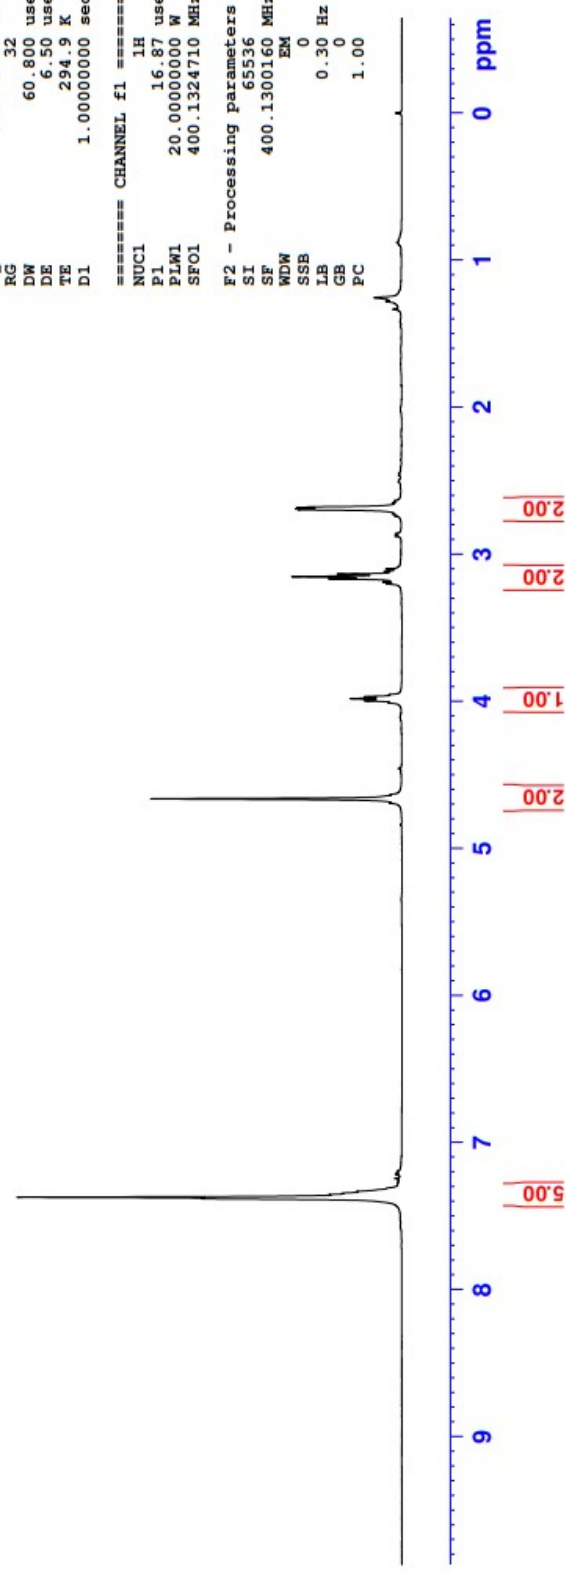

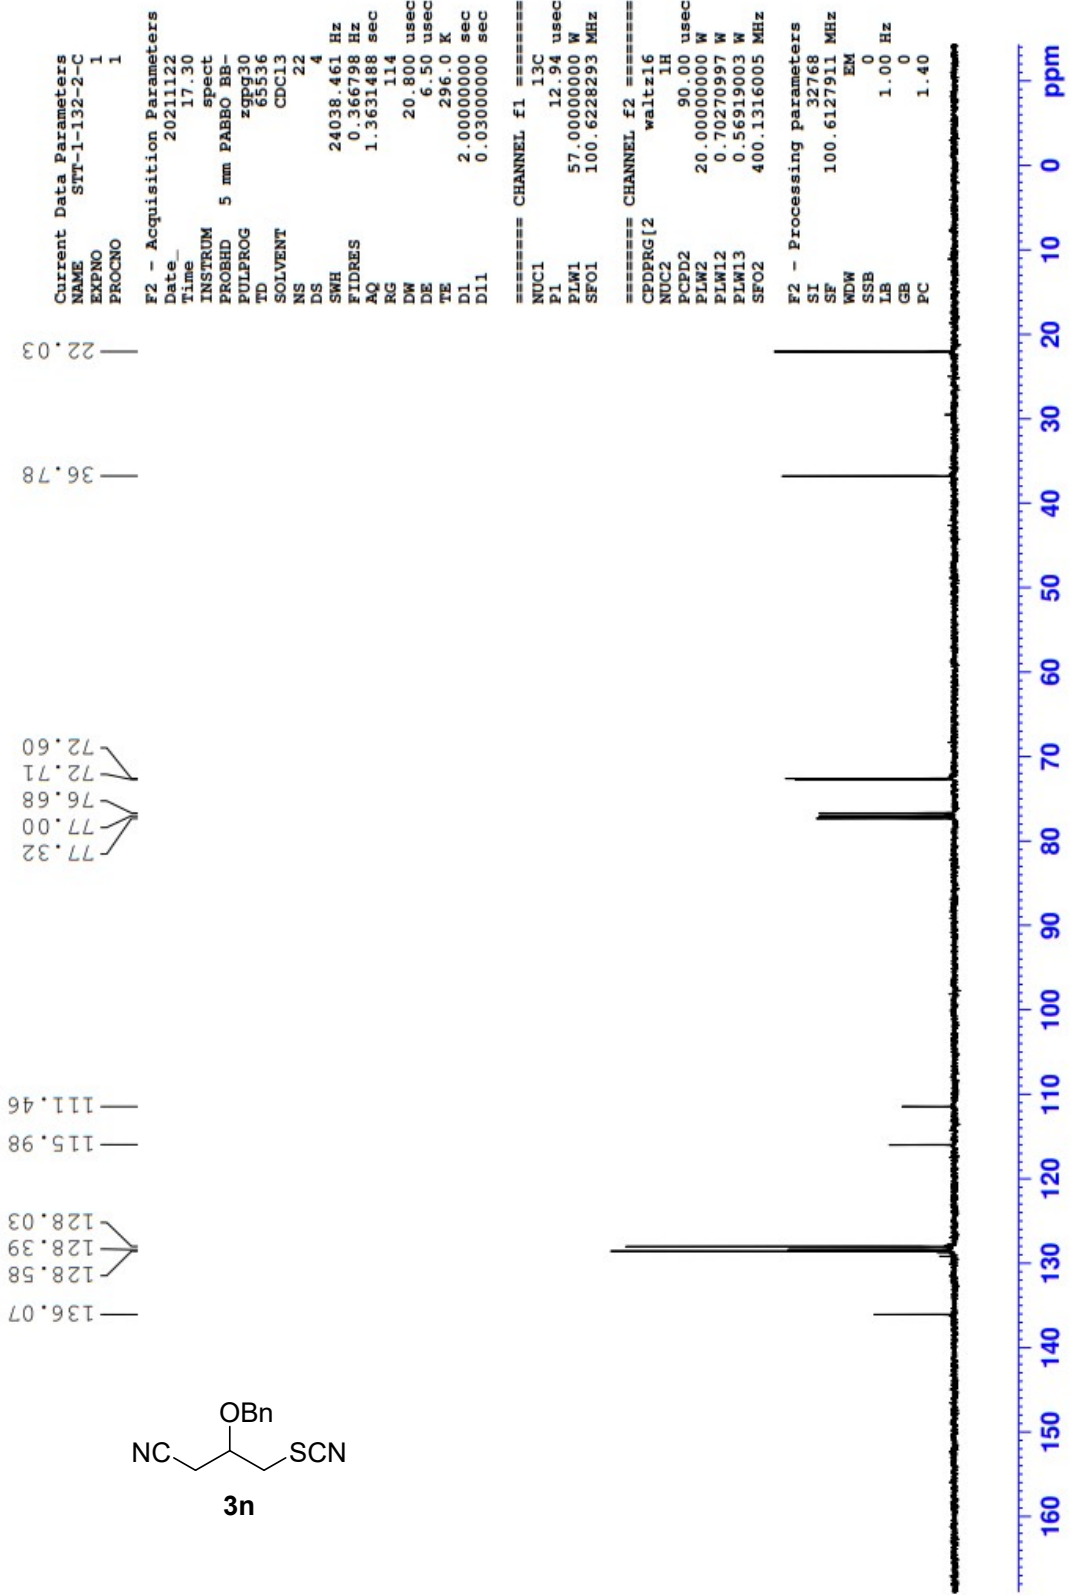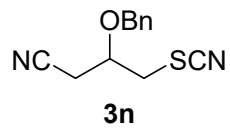

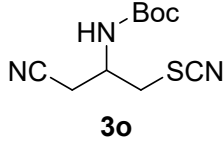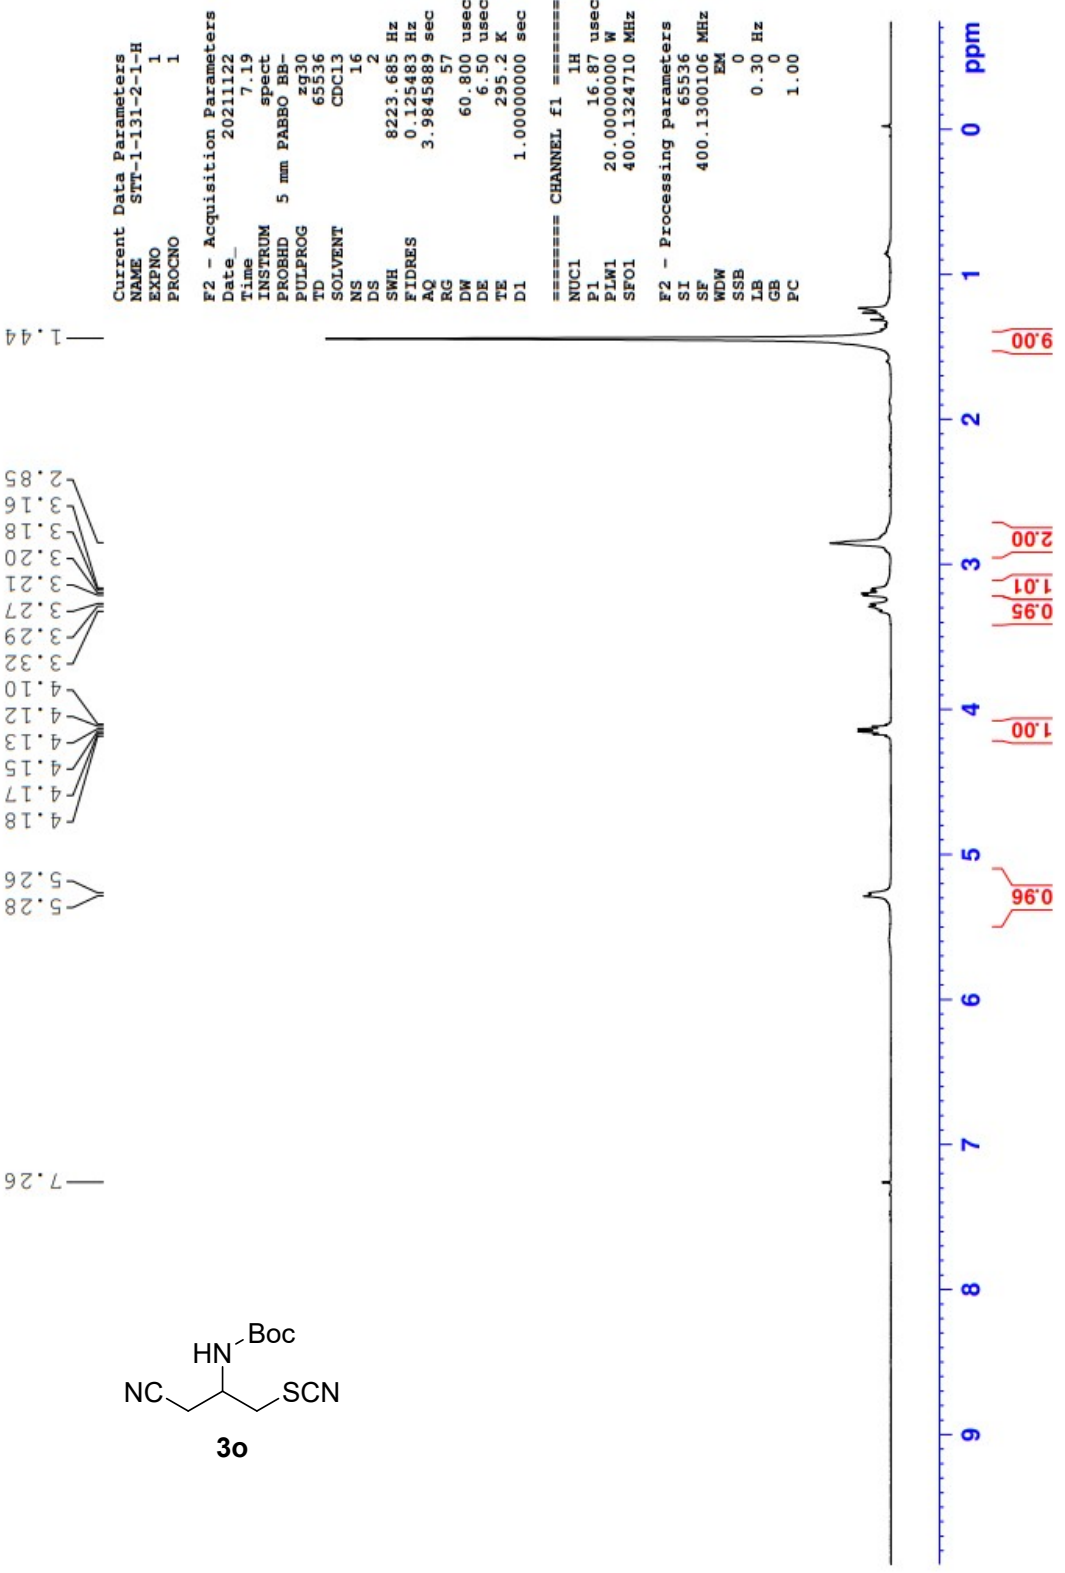

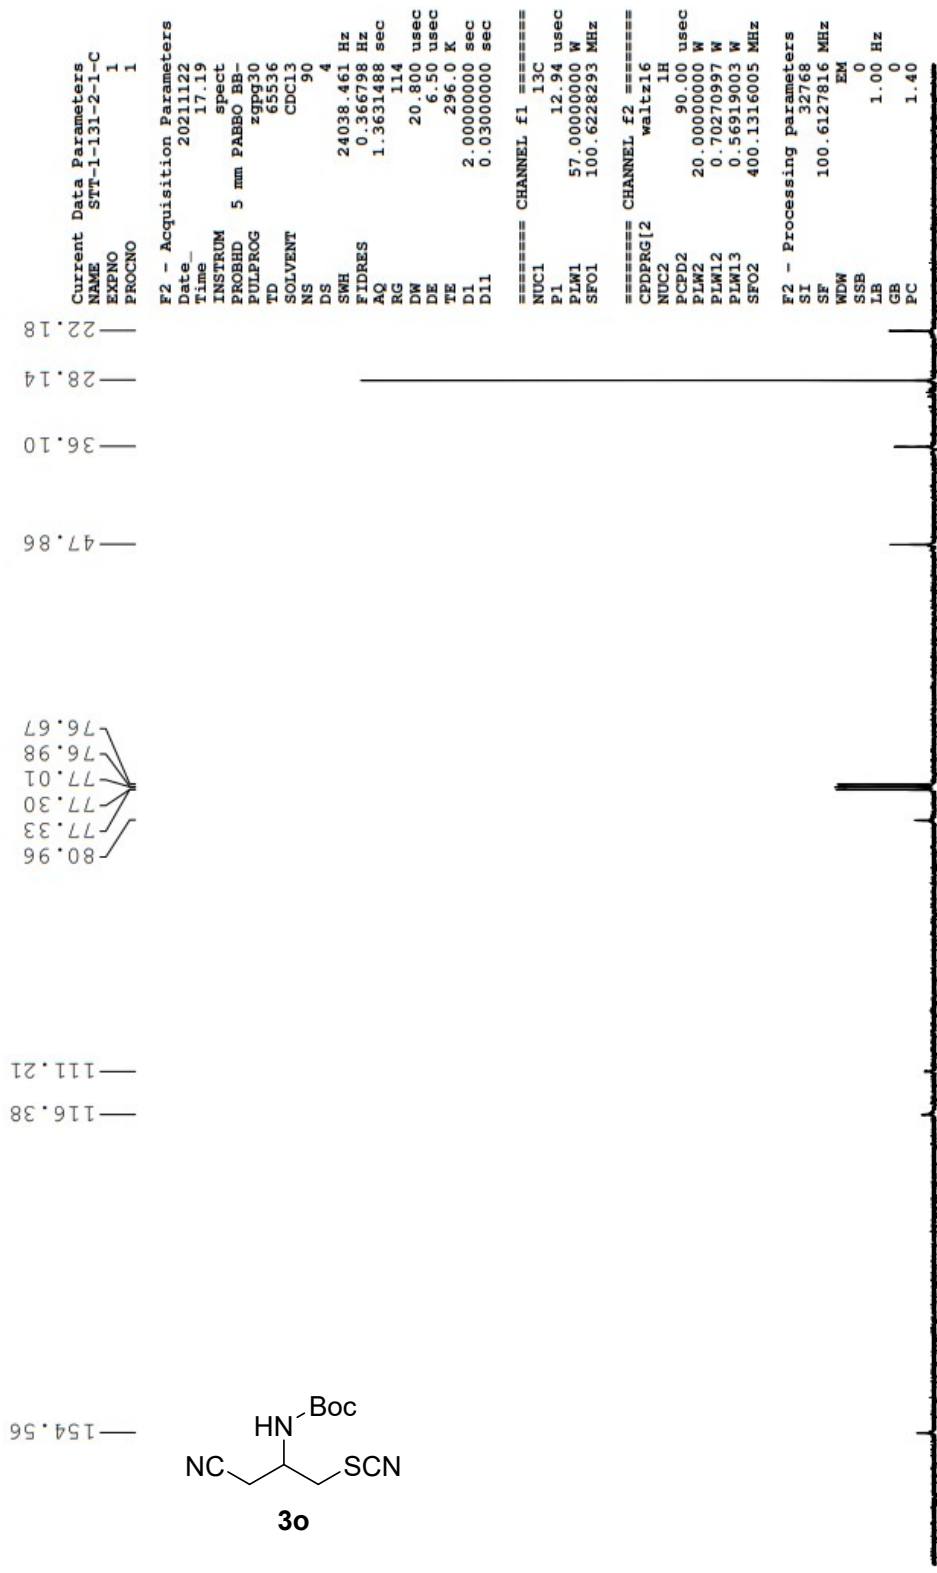

Current Data Parameters  
 NAME STT-1-154-2-H  
 EXPNO 1  
 PROCNO 1

F2 - Acquisition Parameters  
 Date\_ 20220106  
 Time 8.36  
 INSTRUM spect  
 PROBHD 5 mm PABBO BE-  
 PULPROG zg30  
 TD 65536  
 SOLVENT CDCl3  
 NS 16  
 DS 2  
 SWH 8223.685 Hz  
 FIDRES 0.125483 Hz  
 AQ 3.9845889 sec  
 RG 32  
 DW 60.800 usec  
 DE 6.50 usec  
 TE 296.7 K  
 D1 1.00000000 sec

===== CHANNEL f1 =====  
 NUC1 1H  
 P1 16.87 usec  
 PLW1 20.0000000 W  
 SF01 400.1324710 MHz  
 F2 - Processing parameters  
 SI 65536  
 SF 400.1300101 MHz  
 WDW EM  
 SSB 0  
 LB 0.30 Hz  
 GB 0  
 PC 1.00

1.71  
 2.87  
 3.37  
 3.40  
 3.46  
 3.50

7.26  
 7.31  
 7.33  
 7.33  
 7.35  
 7.37  
 7.41  
 7.42  
 7.44

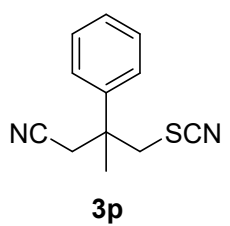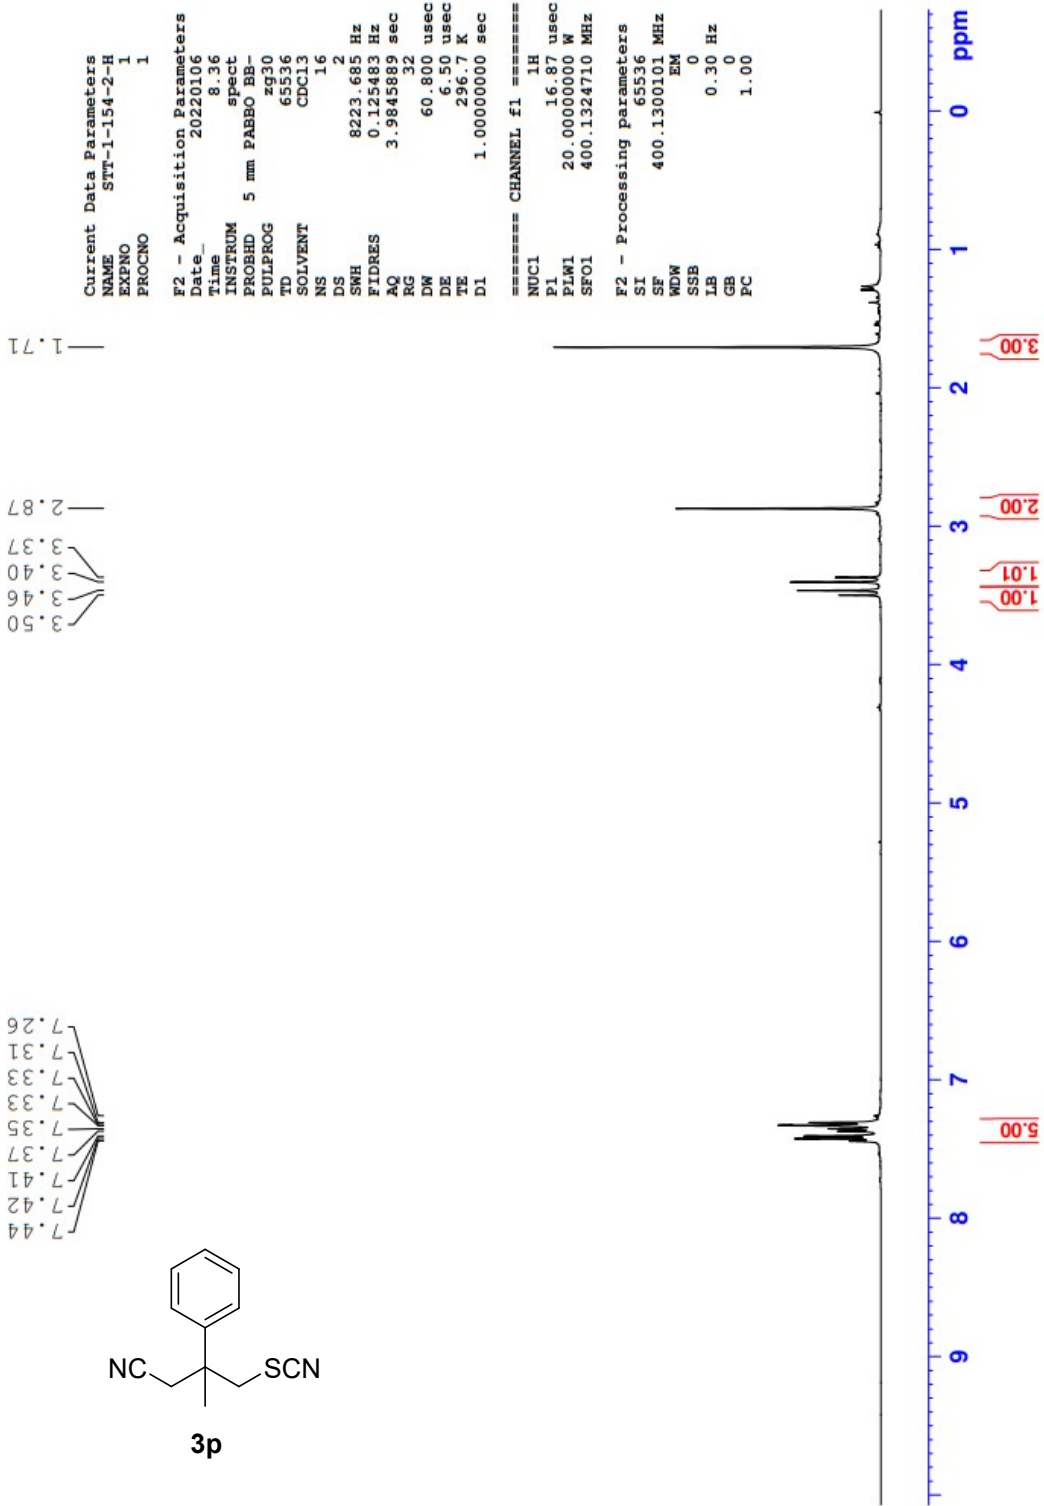

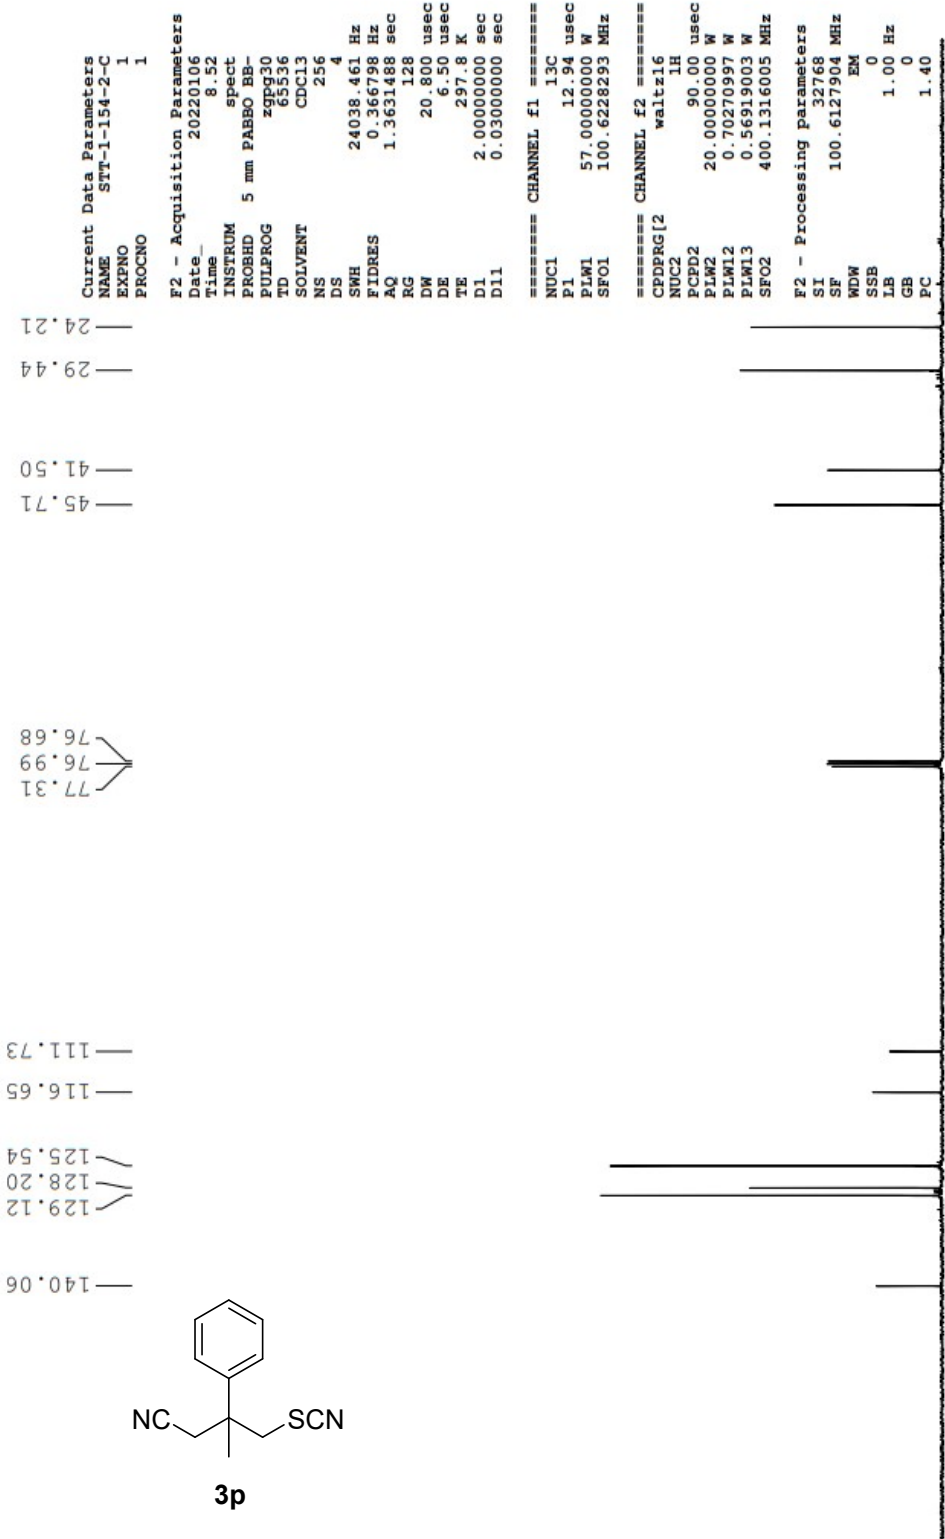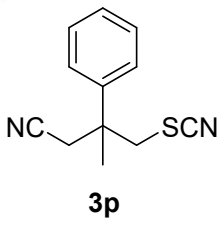



0.87  
0.89  
0.92  
0.94  
2.20  
2.22  
2.23  
2.25  
2.27  
3.00  
3.04  
3.09  
3.10  
3.14  
3.14  
3.63  
3.66  
3.86  
3.86  
3.89  
3.90  
7.18  
7.19  
7.20  
7.20  
7.21  
7.26  
7.32  
7.32  
7.33  
7.34  
7.34  
7.35  
7.36  
7.36  
7.36  
7.39  
7.39  
7.40  
7.41  
7.41  
7.43  
7.43  
7.43

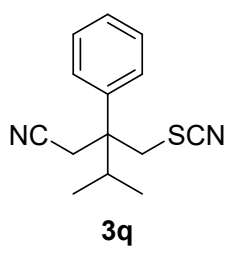

Current Data Parameters  
 NAME SFT-1-33-1-1-H  
 EXPNO 1  
 PROCNO 1  
 F2 - Acquisition Parameters  
 Date\_ 20211011  
 Time 11.53  
 INSTRUM spect  
 PROBHD 5 mm PABBO BB-  
 PULPROG zg30  
 TD 65536  
 SOLVENT CDCl3  
 NS 16  
 DS 2  
 SWH 8223.685 Hz  
 FIDRES 0.125483 Hz  
 AQ 3.9845889 sec  
 RG 71.8  
 DW 60.800 usec  
 DE 6.50 usec  
 TE 299.3 K  
 D1 1.00000000 sec  
 ===== CHANNEL f1 =====  
 NUC1 1H  
 P1 17.66 usec  
 PLW1 20.0000000 W  
 SFO1 400.1324710 MHz  
 F2 - Processing parameters  
 SI 65536  
 SF 400.1300101 MHz  
 EM  
 WDW 0  
 SSB 0  
 LB 0.30 Hz  
 GB 0  
 PC 1.00

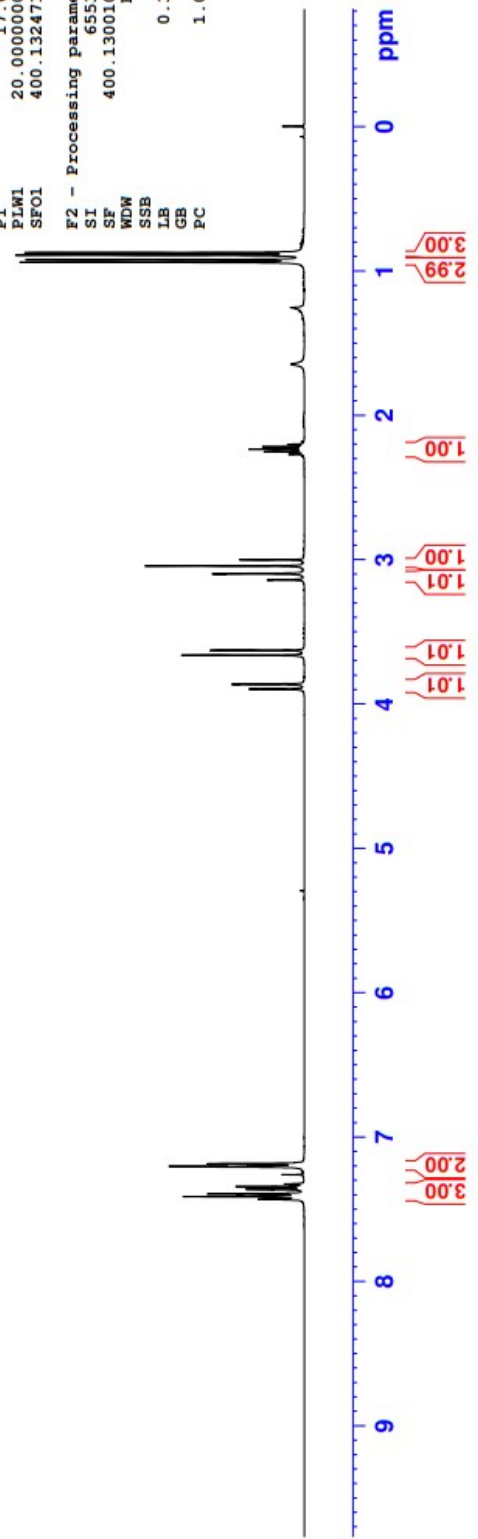



Current Data Parameters  
 NAME SPT-1-33-1-1-C  
 EXPNO 1  
 PROCNO 1

F2 - Acquisition Parameters  
 Date\_ 20211012  
 Time 8.10  
 INSTRUM spect  
 PROBHD 5 mm PABBO BB-  
 PULPROG zgpg30  
 TD 65536  
 SOLVENT CDC13  
 NS 256  
 DS 4  
 SWH 24038.461 Hz  
 FIDRES 0.366798 Hz  
 AQ 1.3631488 sec  
 RG 161  
 DW 20.800 usec  
 DE 6.50 usec  
 TE 301.0 K  
 D1 2.00000000 sec  
 D11 0.03000000 sec

==== CHANNEL f1 =====  
 NUC1 13C  
 P1 13.37 usec  
 PLW1 57.00000000 W  
 SFO1 100.6228293 MHz

==== CHANNEL f2 =====  
 CPDPRG[2] waltz16  
 NUC2 1H  
 P2 90.00 usec  
 PLW2 20.00000000 W  
 PLW12 0.77006000 W  
 PLW13 0.62374997 W  
 SFO2 400.1316005 MHz

F2 - Processing parameters  
 SI 32768  
 SF 100.6127779 MHz  
 WDW EM  
 SSB 0  
 LB 1.00 Hz  
 GB 0  
 PC 1.40

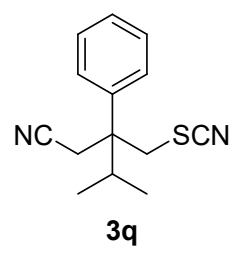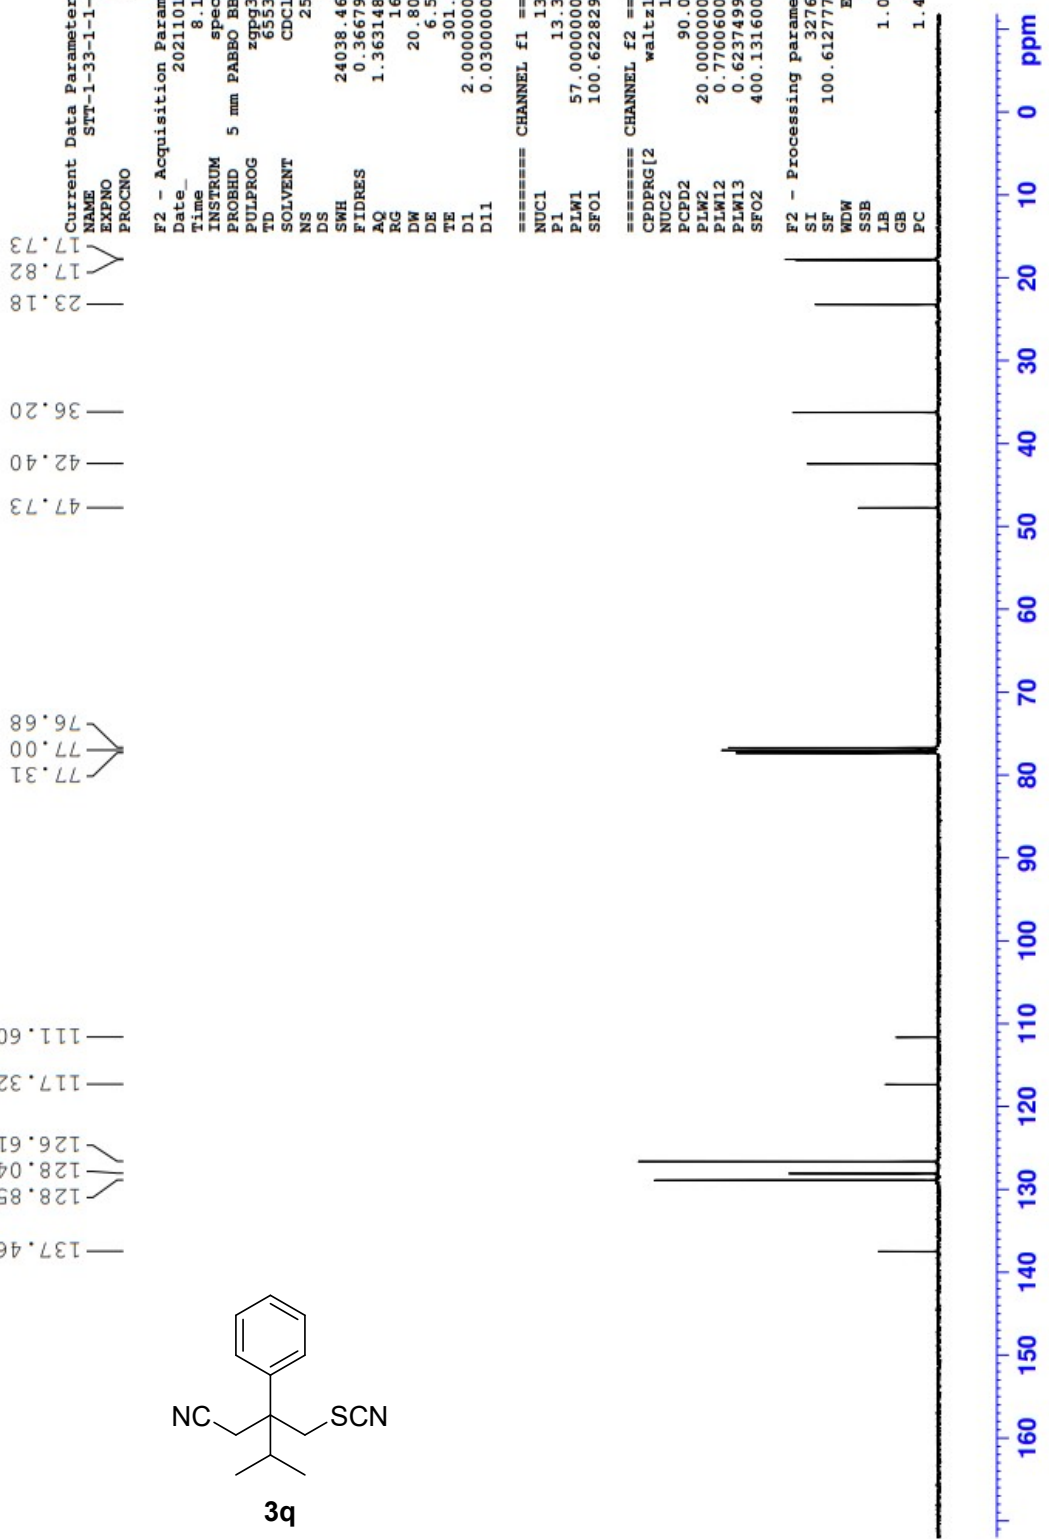

7.42  
7.41  
7.41  
7.40  
7.38  
7.37  
7.36  
7.36  
7.36  
7.26  
7.18  
7.18  
7.16  
7.16

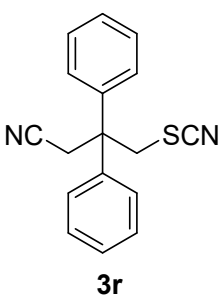

4.02  
3.34

Current Data Parameters  
 NAME STT-1-117-1-1-H  
 EXPNO 1  
 PROCNO 1

F2 - Acquisition Parameters  
 Date\_ 20211025  
 Time 11.31  
 INSTRUM spect  
 PROBHD 5 mm PABBO BB-  
 PULPROG zg30  
 TD 65536  
 SOLVENT CDCl3  
 NS 16  
 DS 2  
 SWH 8223.685 Hz  
 FIDRES 0.125483 Hz  
 AQ 3.9845889 sec  
 RG 71.8  
 DW 60.800 usec  
 DE 6.50 usec  
 TE 299.6 K  
 D1 1.00000000 sec

===== CHANNEL f1 =====  
 NUC1 1H  
 P1 17.66 usec  
 PLW1 20.00000000 W  
 SFO1 400.1324710 MHz

F2 - Processing parameters  
 SI 65536  
 SF 400.1300101 MHz  
 WDW EM  
 SSB 0  
 LB 0.30 Hz  
 GB 0  
 PC 1.00

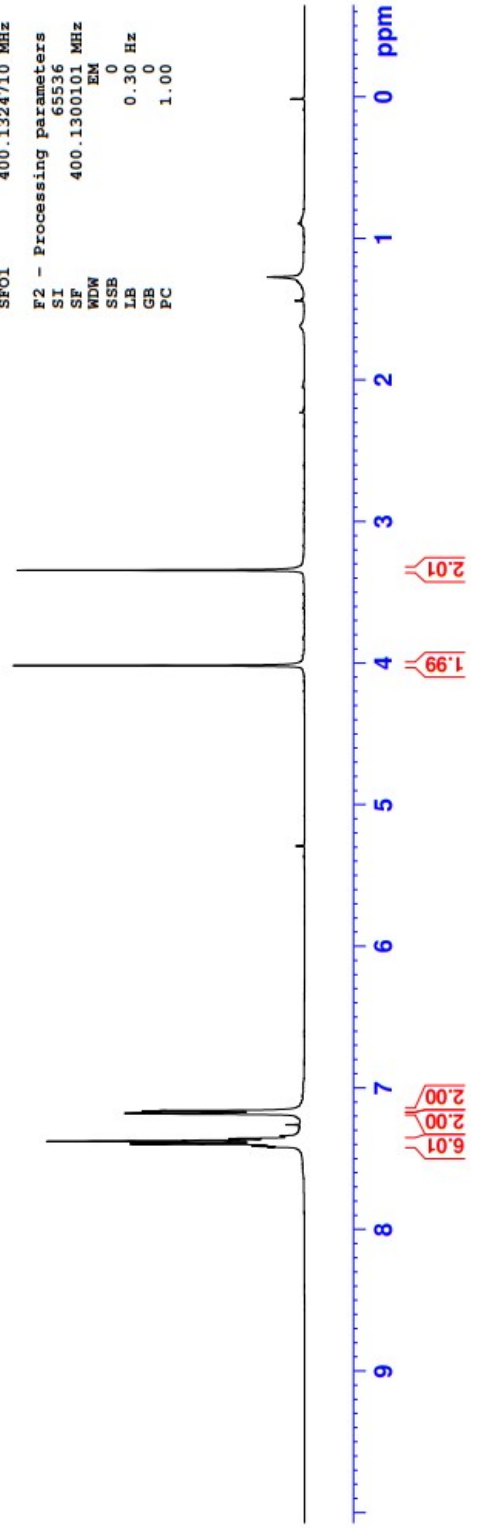

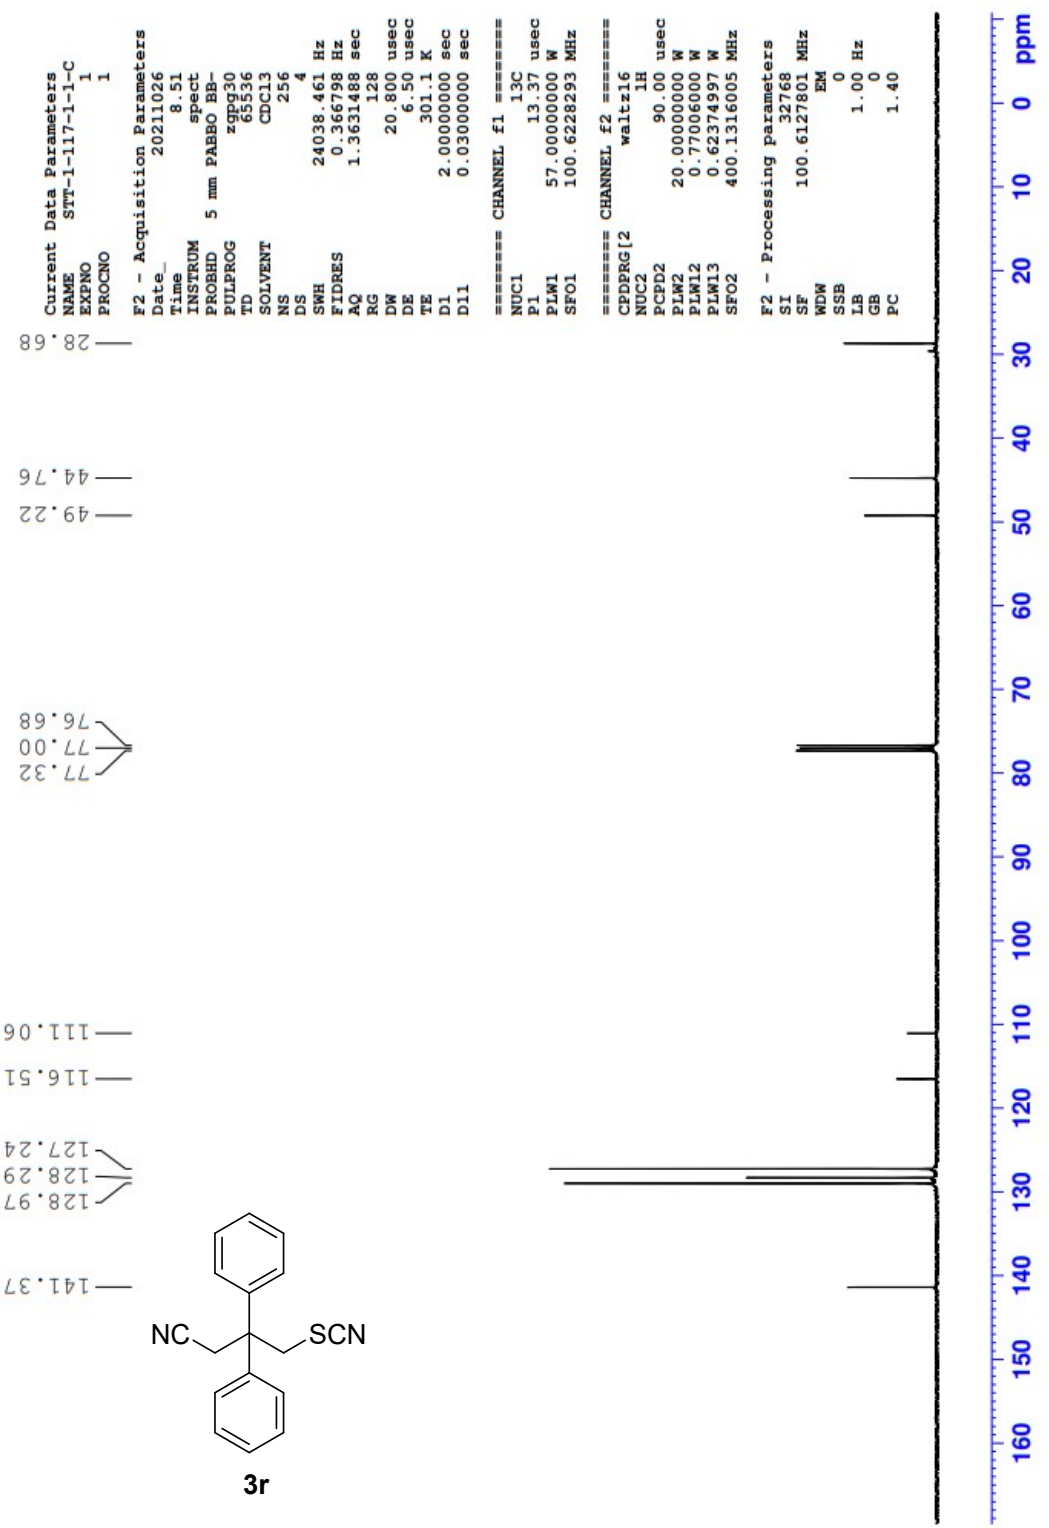



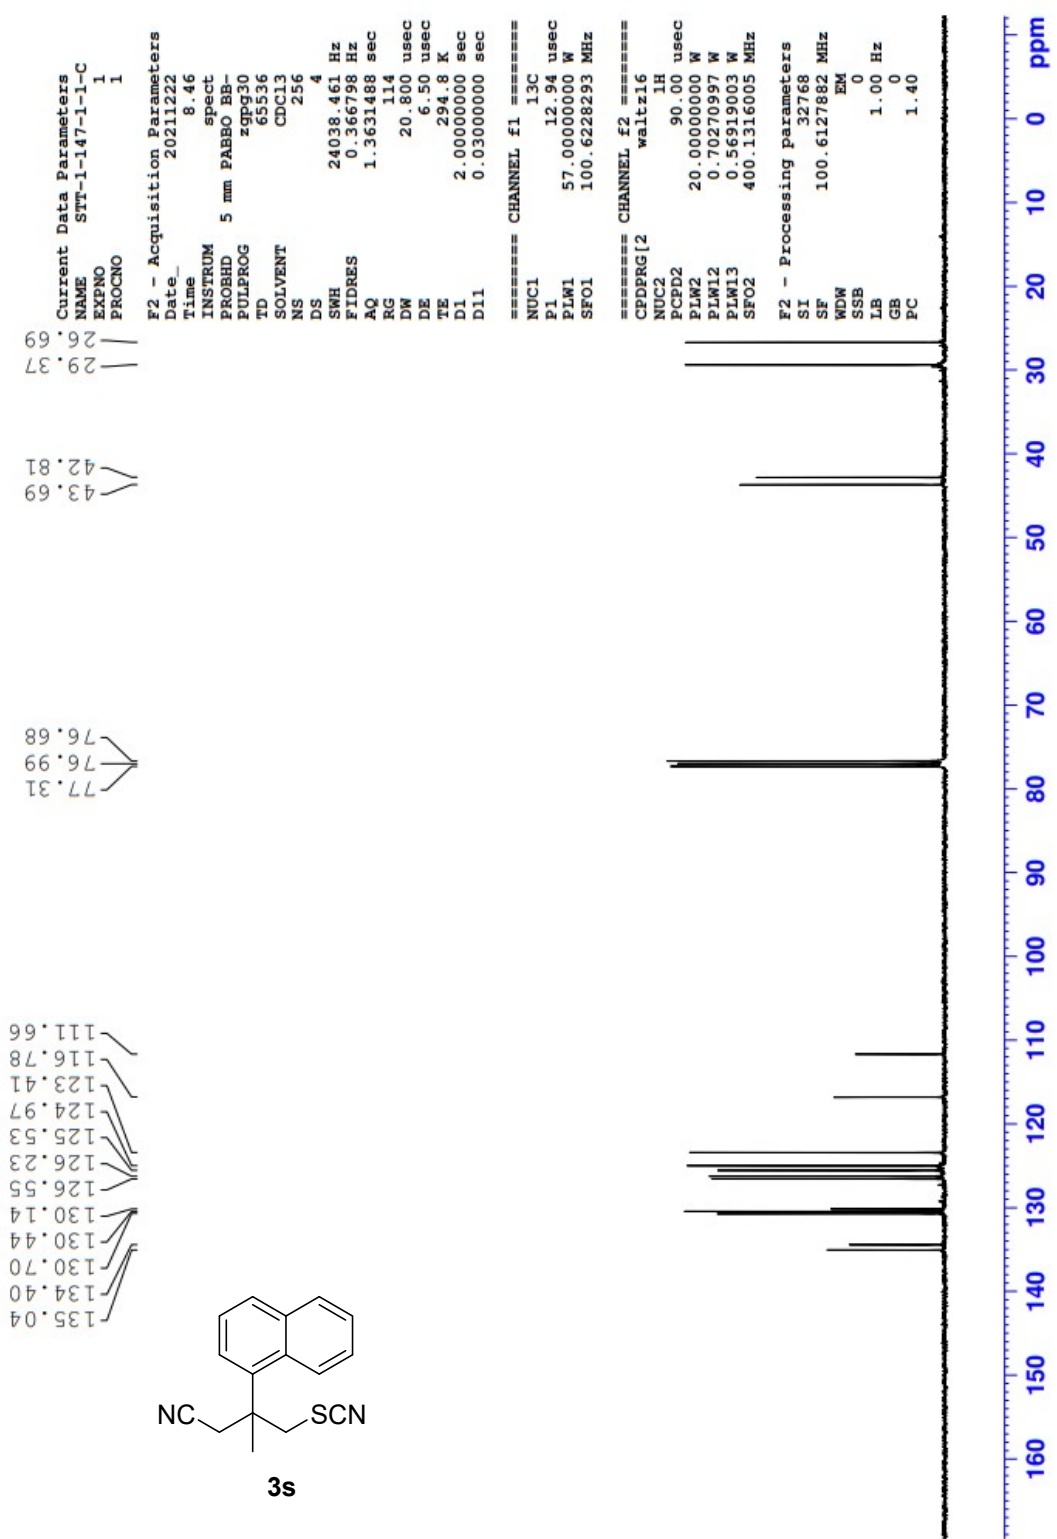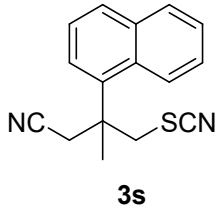

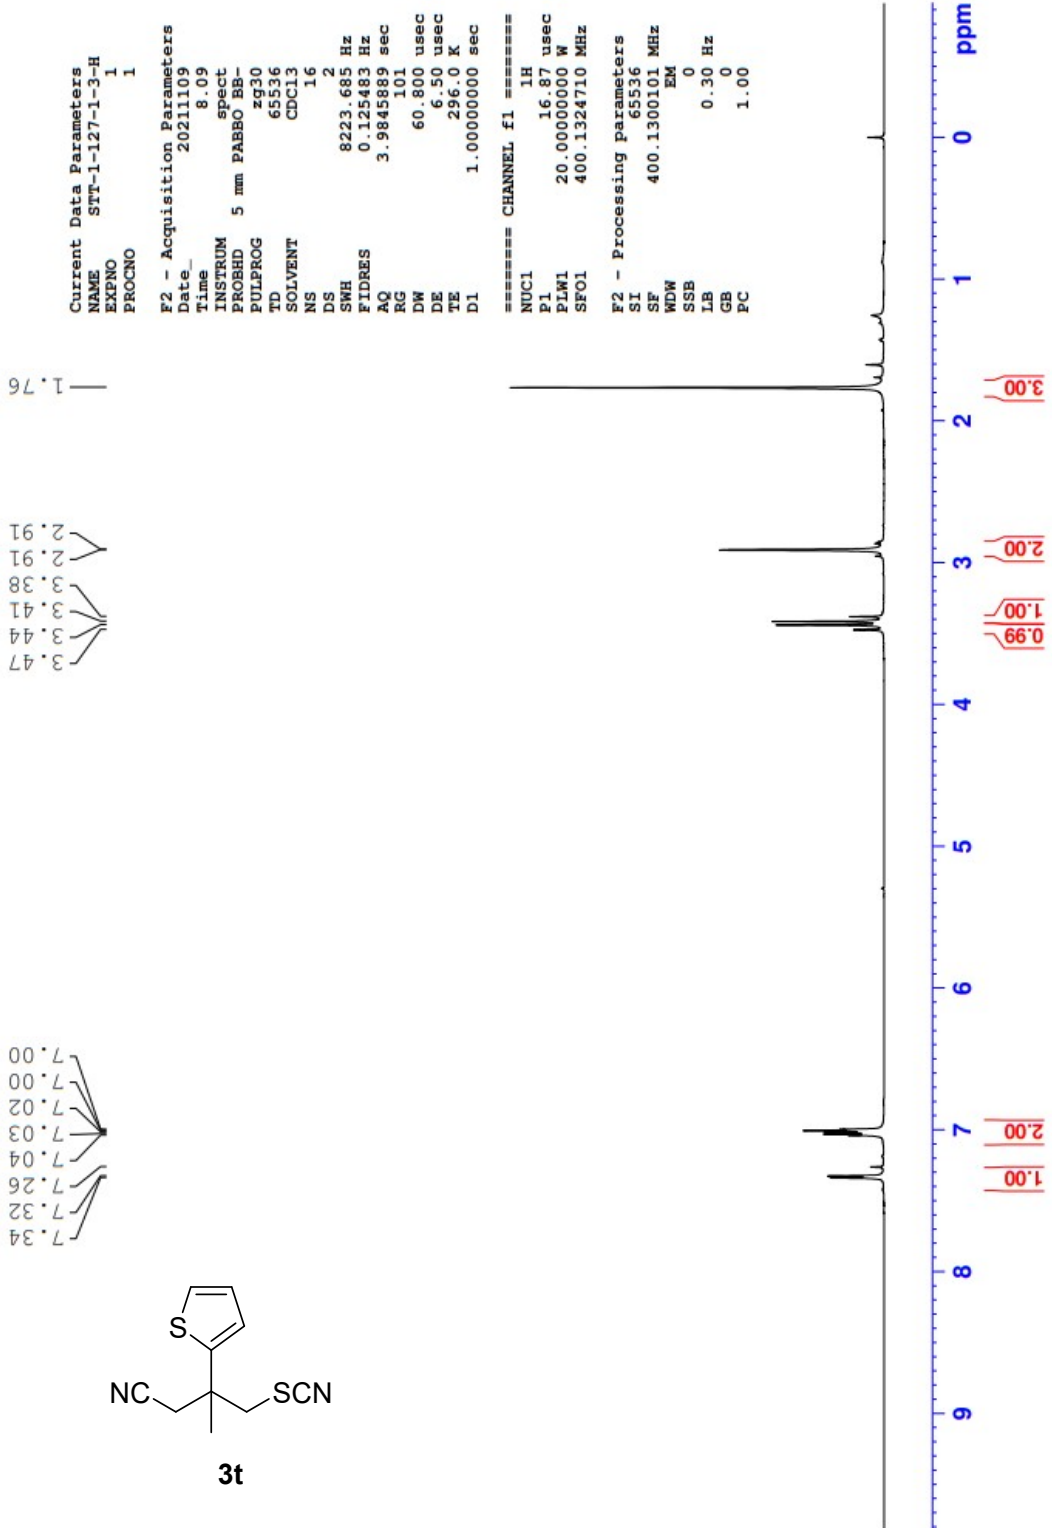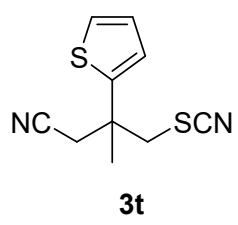

Current Data Parameters  
 NAME STT-1-127-1-3-C  
 EXPNO 1  
 PROCNO 1

F2 - Acquisition Parameters  
 Date\_ 20211110  
 Time 9.22  
 INSTRUM spect  
 PROBHD 5 mm PABBO BB-  
 PULPROG zgpg30  
 TD 65536  
 SOLVENT CDC13  
 NS 256  
 DS 4  
 SWH 24038.461 Hz  
 FIDRES 0.366798 Hz  
 AQ 1.3631488 sec  
 RG 114  
 DW 20.800 usec  
 DE 6.50 usec  
 TE 298.5 K  
 D1 2.00000000 sec  
 D11 0.03000000 sec

===== CHANNEL f1 =====  
 NUC1 13C  
 P1 12.94 usec  
 PLW1 57.0000000 W  
 SF01 100.6228293 MHz

===== CHANNEL f2 =====  
 CPDPRG2 waltz16  
 NUC2 1H  
 FCPD2 90.00 usec  
 PLW2 20.0000000 W  
 PLW12 0.70270997 W  
 PLW13 0.56919003 W  
 SF02 400.1316005 MHz

F2 - Processing parameters  
 SI 32768  
 SF 100.6127779 MHz  
 WDW EM  
 SSB 0  
 LB 1.00 Hz  
 GB 0  
 FC 1.40

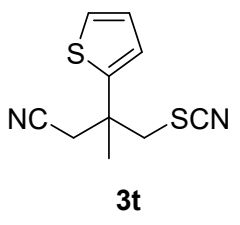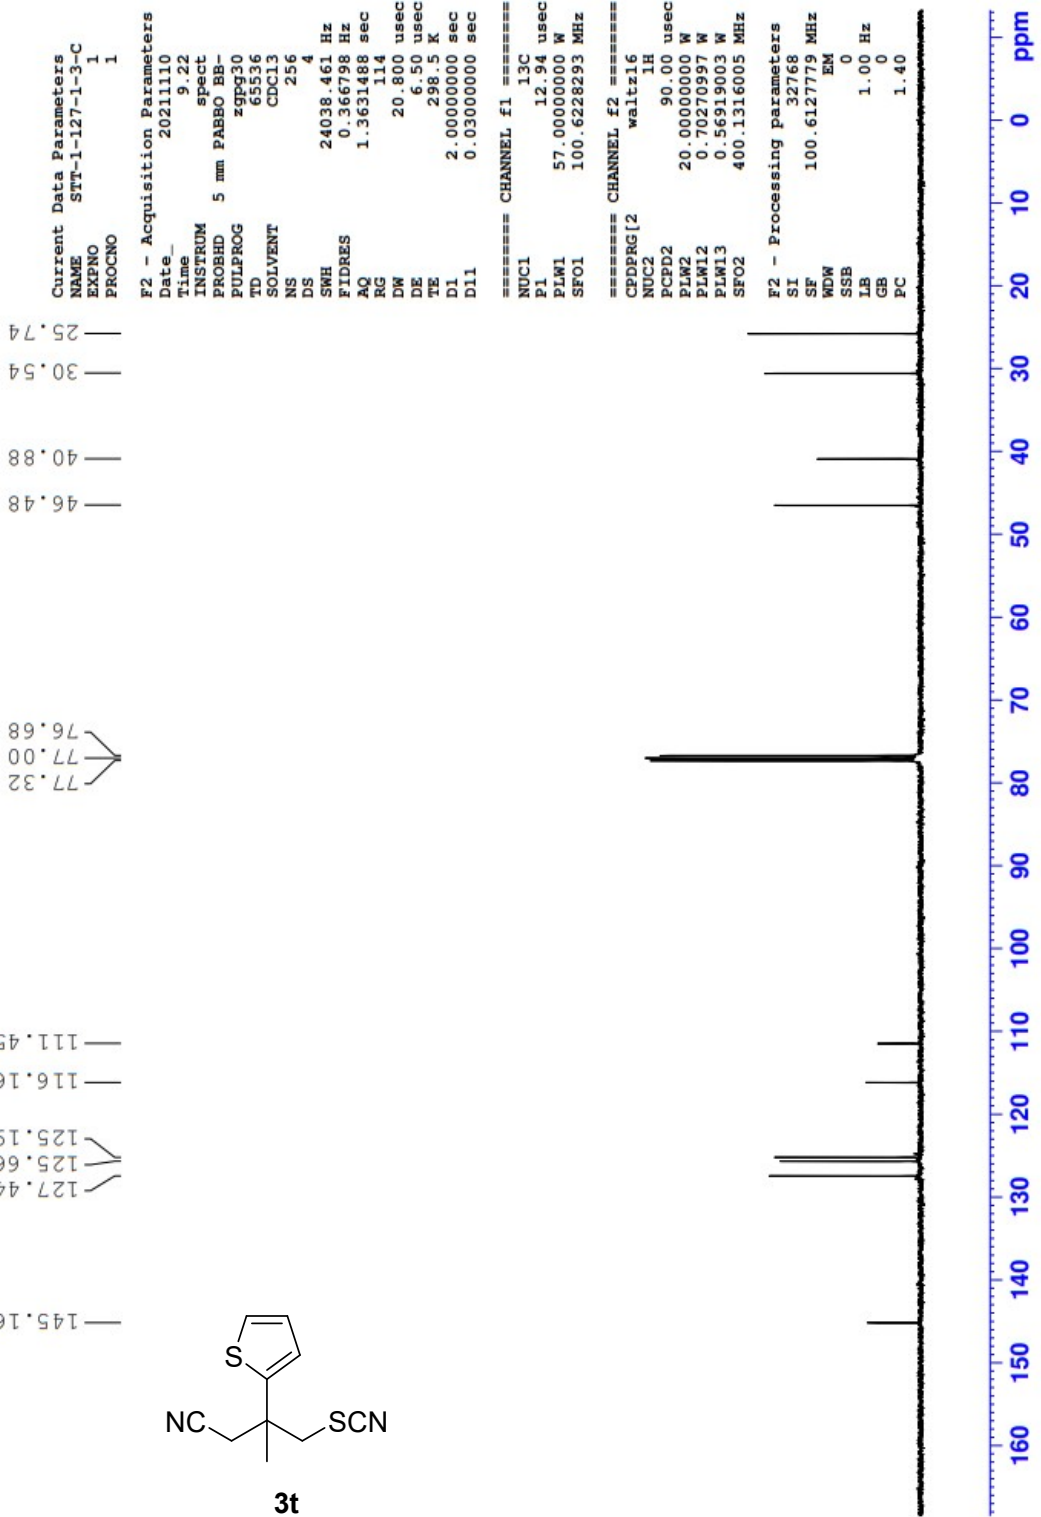



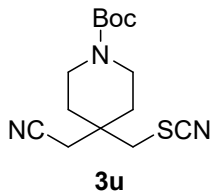

7.26

3.58  
3.56  
3.55  
3.54  
3.53  
3.51  
3.39  
3.37  
3.36  
3.35  
3.33  
3.32  
3.20  
2.61  
1.70  
1.69  
1.67  
1.45

Current Data Parameters  
 NAME STT-1-109-2-H  
 EXPNO 1  
 PROCNO 1  
 F2 - Acquisition Parameters  
 Date\_ 20211006  
 Time 8.10  
 INSTRUM spect  
 PROBHD 5 mm PABBO BB-  
 PULPROG zg30  
 TD 65536  
 SOLVENT CDCl3  
 NS 16  
 DS 2  
 SWH 8223.685 Hz  
 FIDRES 0.125483 Hz  
 AQ 3.9845889 sec  
 RG 90.5  
 DW 60.800 usec  
 DE 6.50 usec  
 TE 296.8 K  
 D1 1.00000000 sec  
 ===== CHANNEL f1 =====  
 NUC1 1H  
 P1 17.66 usec  
 PLW1 20.0000000 W  
 SFO1 400.1324710 MHz  
 F2 - Processing parameters  
 SI 65536  
 SF 400.1300102 MHz  
 WDW EM  
 SSB 0  
 LB 0.30 Hz  
 GB 0  
 PC 1.00

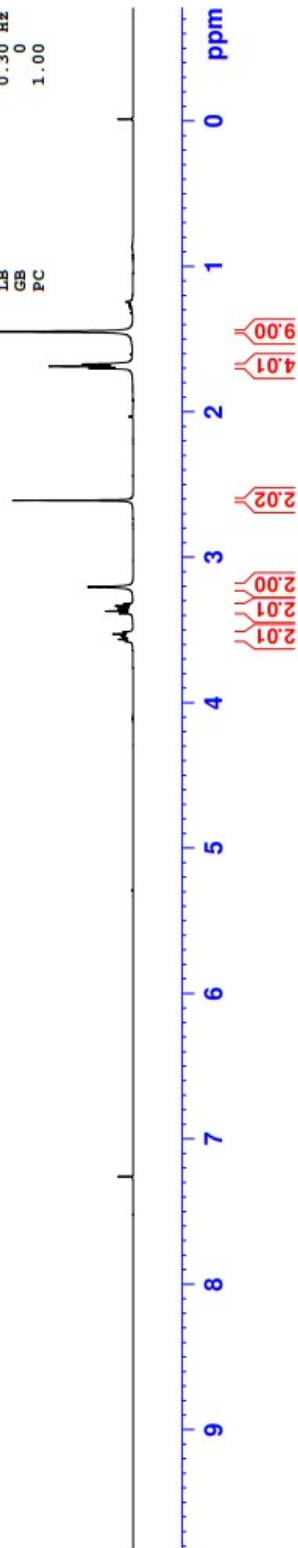

Current Data Parameters  
 NAME STT-1-109-2-C  
 EXPNO 1  
 PROCNO 1

F2 - Acquisition Parameters  
 Date\_ 20211008  
 Time 11.23  
 INSTRUM spect  
 PROBHD 5 mm PABBO BB-  
 PULPROG zgpg30  
 TD 65536  
 SOLVENT CDCl3  
 NS 256  
 DS 4  
 SWH 24038.461 Hz  
 FIDRES 0.366798 Hz  
 AQ 1.3631488 sec  
 RG 144  
 DW 20.800 usec  
 DE 6.50 usec  
 TE 300.1 K  
 D1 2.00000000 sec  
 D11 0.03000000 sec

===== CHANNEL f1 =====  
 NUC1 13C  
 P1 13.37 usec  
 PLW1 57.0000000 W  
 SF01 100.6228293 MHz

===== CHANNEL f2 =====  
 CPDPRG2 waltz16  
 NUC2 1H  
 PCPD2 90.00 usec  
 PLW2 20.0000000 W  
 PLW12 0.77006000 W  
 PLW13 0.62374997 W  
 SFO2 400.1316005 MHz

F2 - Processing parameters  
 SI 32768  
 SF 100.6127742 MHz  
 WDW EM  
 SSB 0  
 LB 1.00 Hz  
 GB 0  
 PC 1.40

— 24.77  
 — 28.31  
 — 33.06  
 — 36.84  
 — 41.71

— 76.68  
 — 77.00  
 — 77.32  
 — 80.31

— 111.70  
 — 115.99

— 154.36

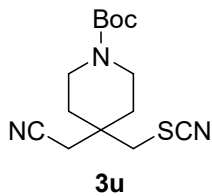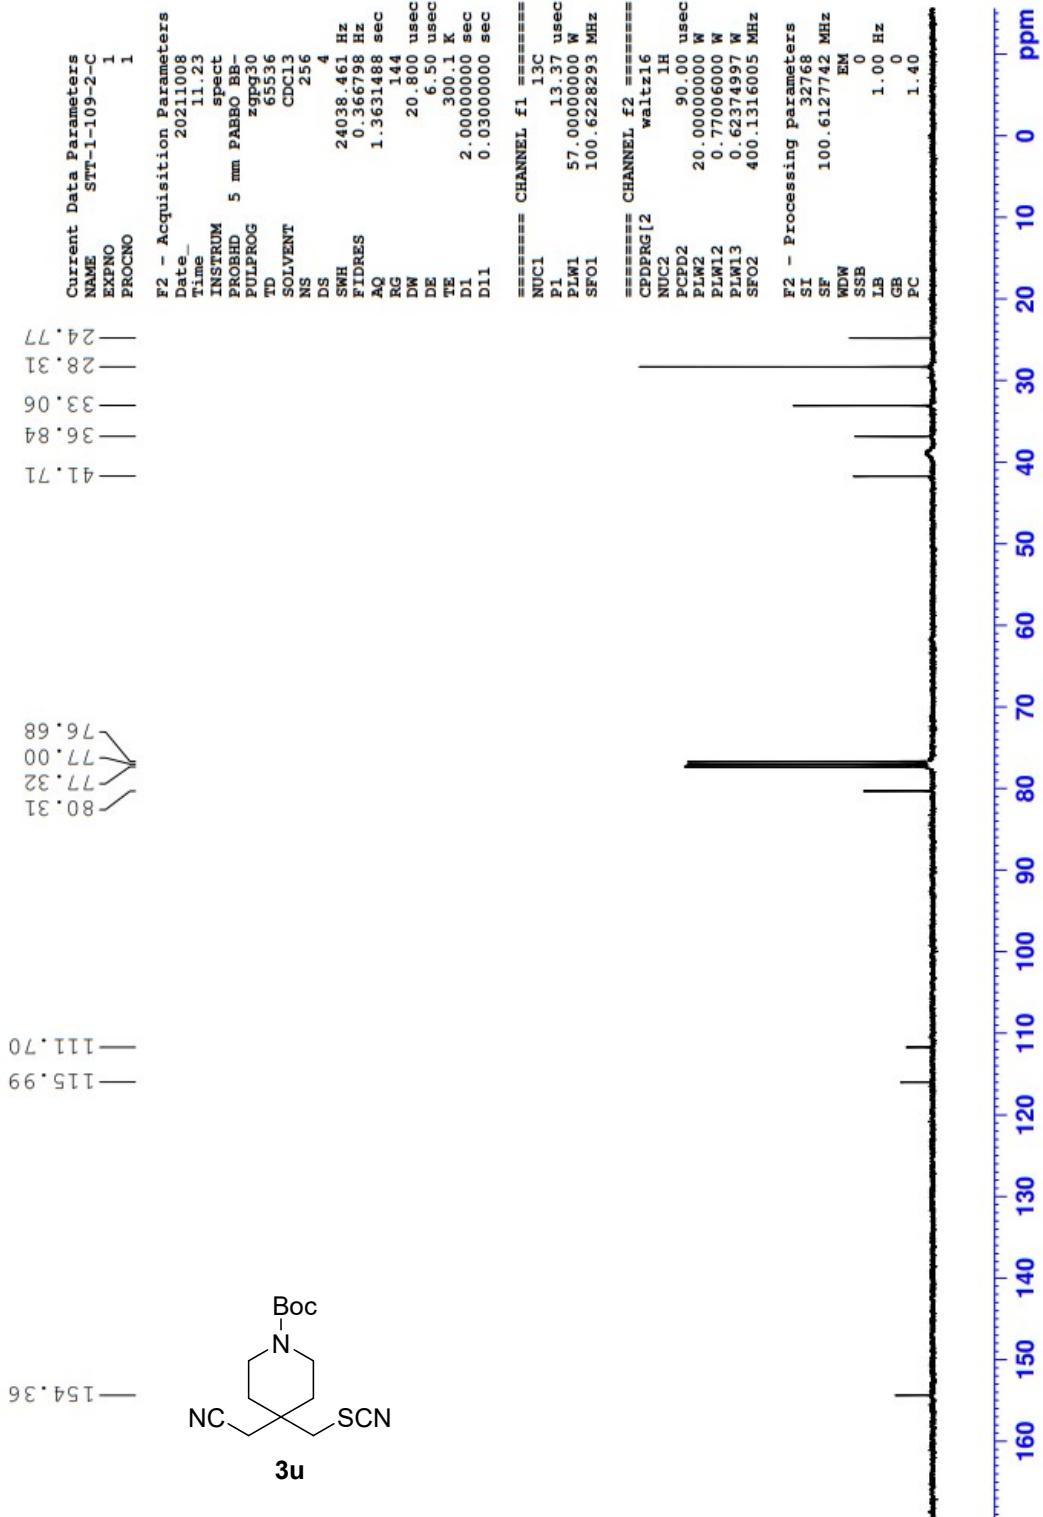

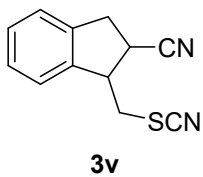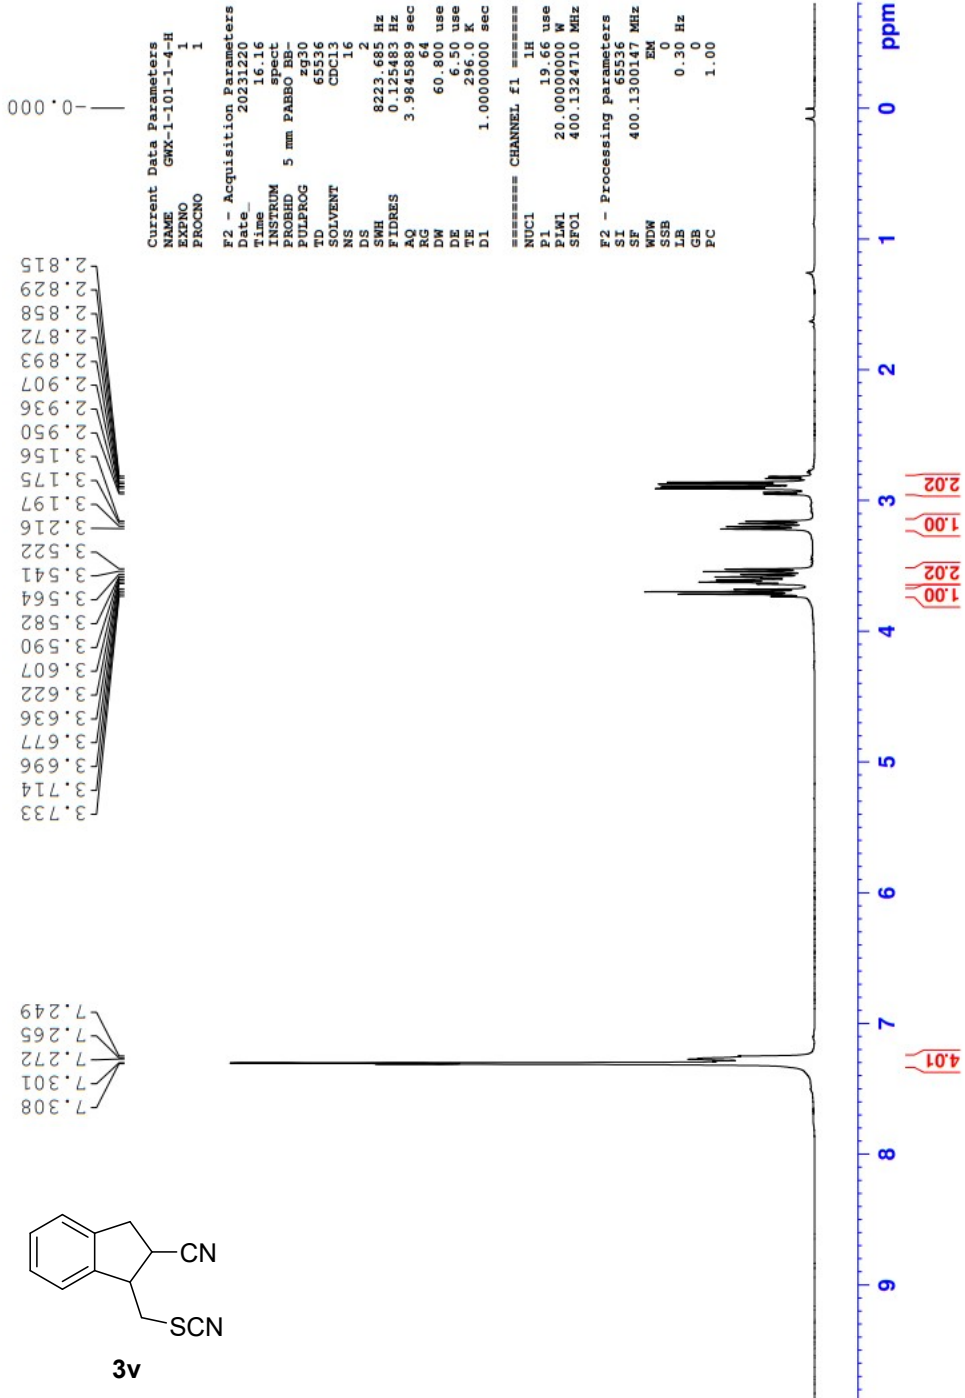

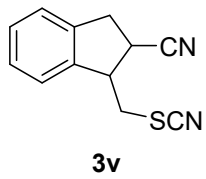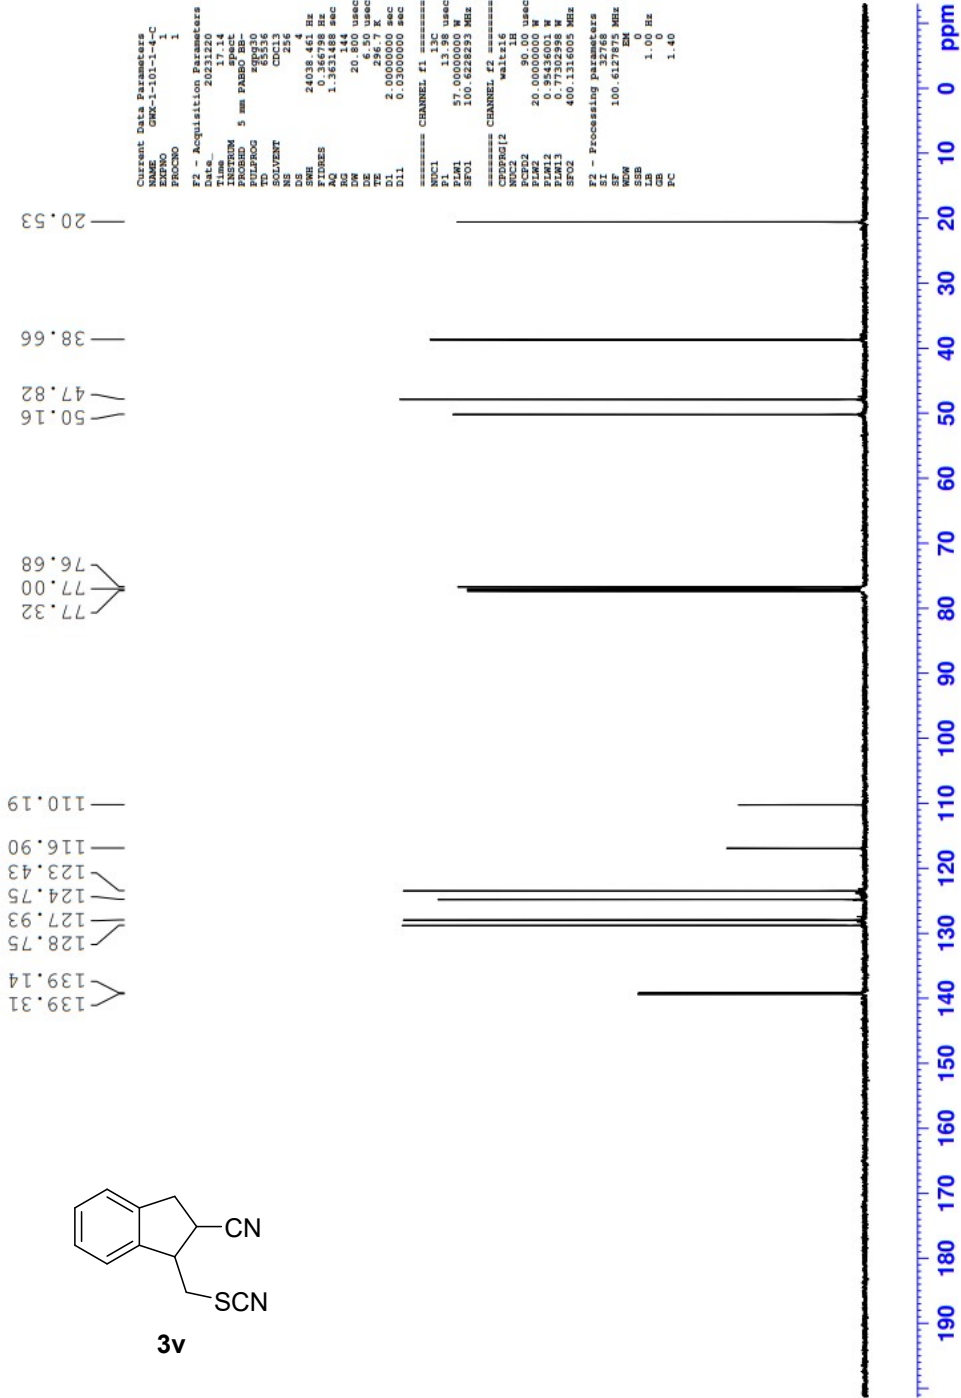

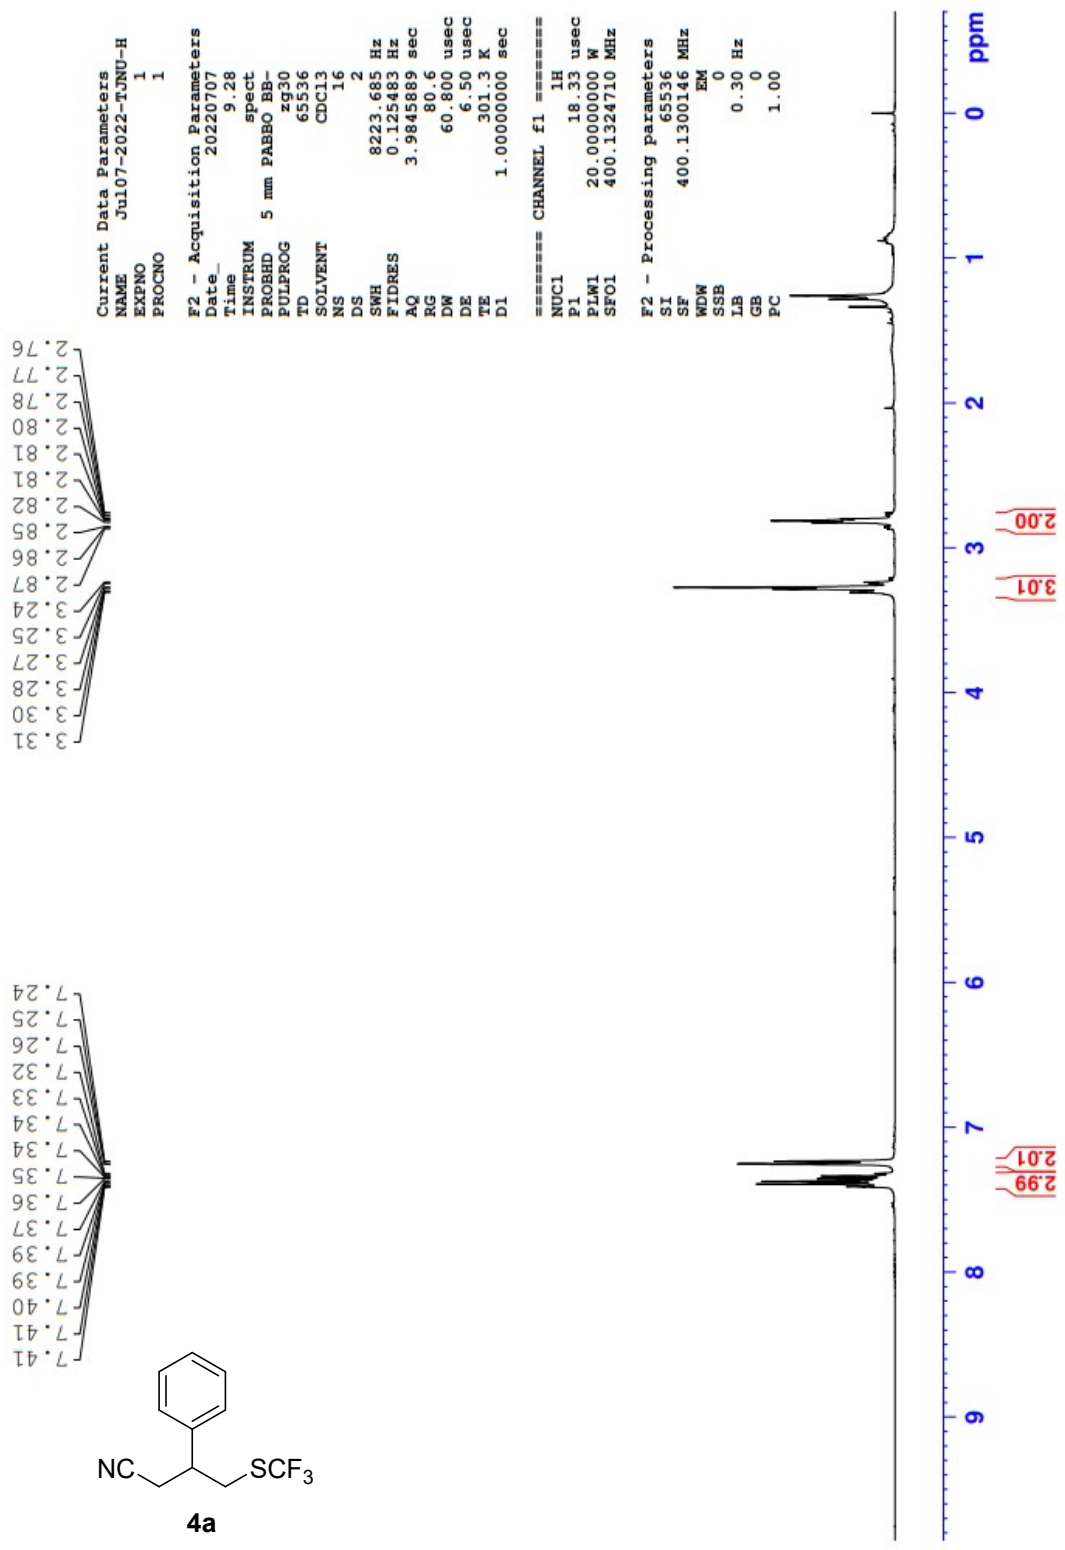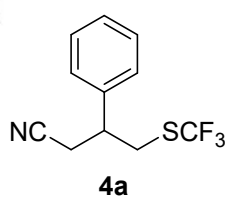

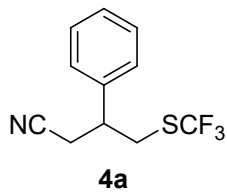

138.74  
 135.14  
 132.10  
 129.24  
 129.05  
 128.45  
 127.03  
 126.00  
 117.24

77.31  
 77.00  
 76.68

41.79

34.25  
 34.23

23.31

Current Data Parameters  
 NAME STW-1-163-1-C  
 EXPNO 1  
 PROCNO 1  
 F2 - Acquisition Parameters  
 Date\_ 20220708  
 Time 8.29  
 INSTRUM spect  
 PROBHD 5 mm PABBO BB-  
 PULPROG zgpg30  
 TD 65536  
 SOLVENT CDCl3  
 NS 256  
 DS 4  
 SWH 24038.461 Hz  
 FIDRES 0.366798 Hz  
 AQ 1.3631488 sec  
 RG 114  
 DW 20.800 usec  
 DE 6.50 usec  
 TE 303.0 K  
 D1 2.00000000 sec  
 D11 0.03000000 sec  
 ===== CHANNEL f1 =====  
 NUC1 13C  
 P1 13.34 usec  
 PLW1 57.00000000 W  
 SFO1 100.6228293 MHz  
 ===== CHANNEL f2 =====  
 CPDPRG[2] waltz16  
 NUC2 1H  
 P2 90.00 usec  
 PLW2 20.00000000 W  
 PLW12 0.8295998 W  
 PLW13 0.67198002 W  
 SFO2 400.1316005 MHz  
 F2 - Processing parameters  
 SI 32768  
 SF 100.6127750 MHz  
 WDW EM  
 SSB 0  
 LB 1.00 Hz  
 GB 0  
 PC 1.40

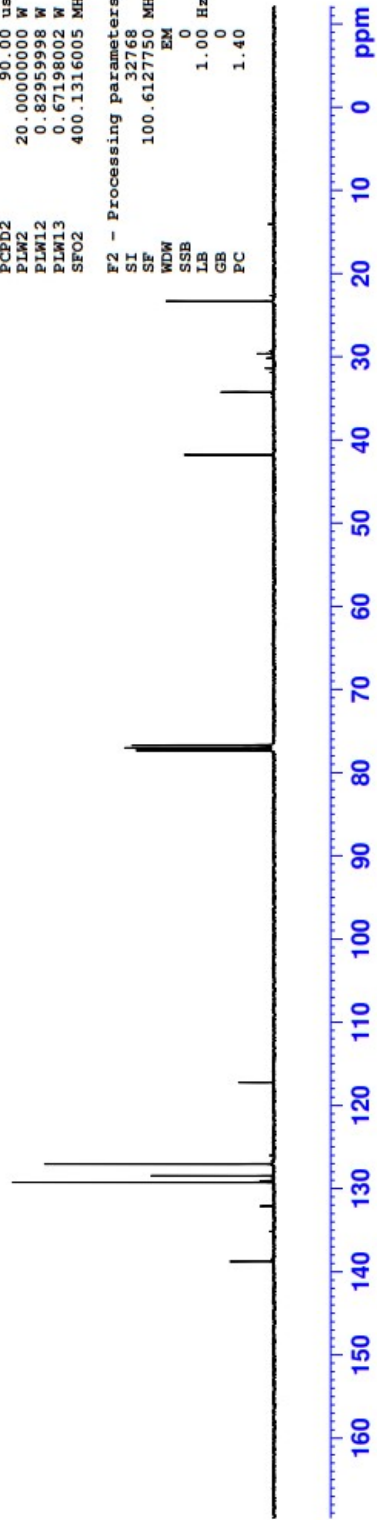

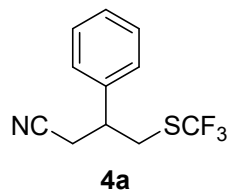

—40.89

Current Data Parameters  
 NAME Jul07-2022-TJNU-F  
 EXPNO 1  
 PROCNO 1

F2 - Acquisition Parameters  
 Date\_ 20220707  
 Time 9.30  
 INSTRUM spect  
 PROBHD 5 mm PABBO BB-  
 PULPROG zgpg30  
 TD 131072  
 SOLVENT CDCl3  
 NS 16  
 DS 4  
 SWH 89285.711 Hz  
 FIDRES 0.681196 Hz  
 AQ 0.7340032 sec  
 RG 203  
 DW 5.600 usec  
 DE 6.50 usec  
 TE 301.4 K  
 D1 1.0000000 sec  
 D11 0.0300000 sec  
 D12 0.0000200 sec

===== CHANNEL f1 =====  
 NUC1 19F  
 P1 20.58 usec  
 PLW1 18.19700050 W  
 SFO1 376.4607164 MHz

===== CHANNEL f2 =====  
 CPDPRG[2] waltz16  
 NUC2 1H  
 PCPD2 90.00 usec  
 PLW2 20.0000000 W  
 PLW12 0.8295998 W  
 SFO2 400.1316005 MHz

F2 - Processing parameters  
 SI 65536  
 SF 376.4983660 MHz  
 WDW EM  
 SSB 0  
 LB 0.30 Hz  
 GB 0  
 PC 1.00

ppm

-160

-140

-120

-100

-80

-60

-40

-20

0



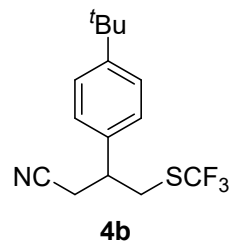

7.42  
7.40  
7.26  
7.19  
7.17

3.33  
3.33  
3.33  
3.31  
3.30  
3.29  
3.28  
3.27  
3.26  
3.24  
3.22  
2.83  
2.83  
2.82  
2.82  
2.81

1.33

Current Data Parameters  
 NAME STT-1-164-1-2-H  
 EXPNO 1  
 PROCNO 1

F2 - Acquisition Parameters  
 Date 20220711  
 Time 17.12  
 INSTRUM spect  
 PROBHD 5 mm PABBO BB-  
 PULPROG zg30  
 TD 65536  
 SOLVENT CDCl3  
 NS 16  
 DS 2  
 SWH 8223.685 Hz  
 FIDRES 0.125483 Hz  
 AQ 3.984589 sec  
 RG 64  
 DW 60.800 usec  
 DE 6.50 usec  
 TE 301.5 K  
 D1 1.00000000 sec

===== CHANNEL f1 =====  
 NUC1 1H  
 P1 18.33 usec  
 PLW1 20.00000000 W  
 SF01 400.1324710 MHz

F2 - Processing parameters  
 SI 65536  
 SF 400.1300099 MHz  
 WDW EM  
 SSB 0  
 LB 0.30 Hz  
 GB 0  
 FC 1.00

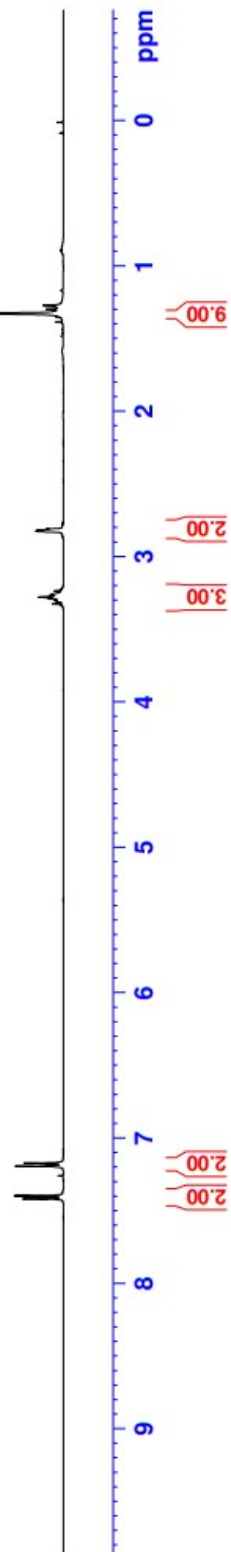

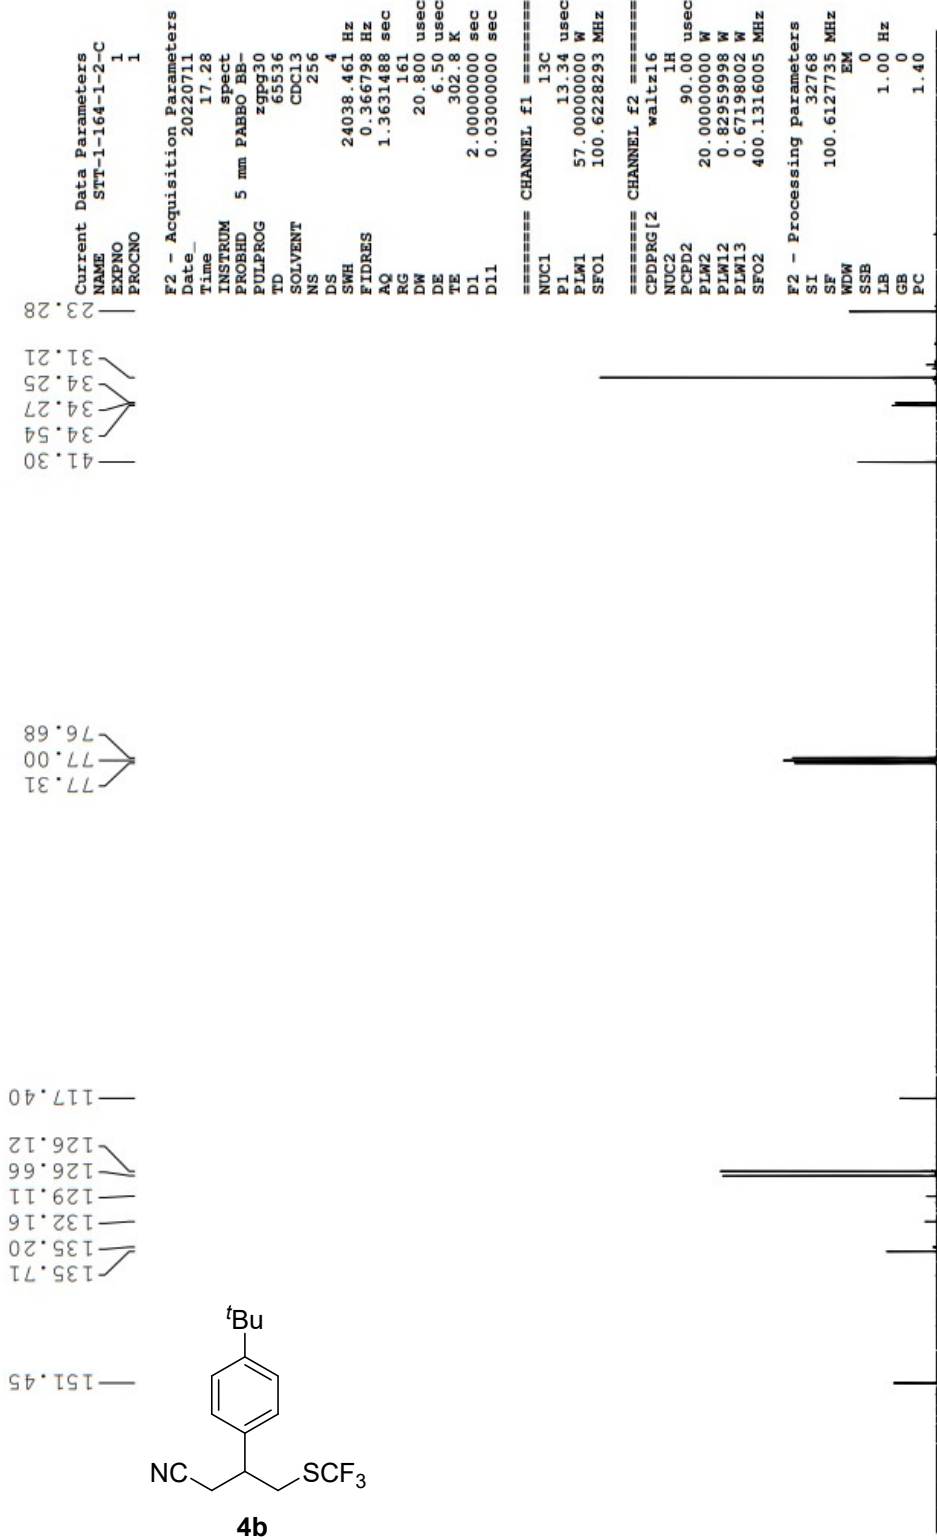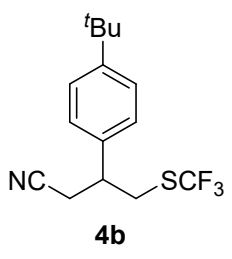

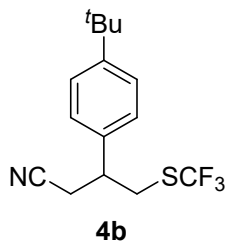

— -40.88

```

Current Data Parameters
NAME STT-1-164-1-F
EXPNO 1
PROCNO 1

F2 - Acquisition Parameters
Date_ 20220708
Time 7.50
INSTRUM spect
PROBHD 5 mm PABBO BB-
PULPROG zgpg30
TD 131072
SOLVENT CDCl3
NS 16
DS 4
SWH 89285.711 Hz
FIDRES 0.681196 Hz
AQ 0.7340032 sec
RG 203
DW 5.600 usec
DE 6.50 usec
TE 302.1 K
D1 1.00000000 sec
D11 0.03000000 sec
D12 0.00002000 sec

===== CHANNEL f1 =====
NUC1 13F
P1 20.58 usec
PLW1 18.19700050 W
SFO1 376.4607164 MHz

===== CHANNEL f2 =====
CPDPRG2 waltz16
NUC2 1H
P2 90.00 usec
PLW2 20.00000000 W
SFO2 400.1316005 MHz

F2 - Processing parameters
SI 65536
SF 376.4983660 MHz
WDW EM
SSB 0
LB 0.30 Hz
GB 0
PC 1.00

```

0 -20 -40 -60 -80 -100 -120 -140 -160 ppm

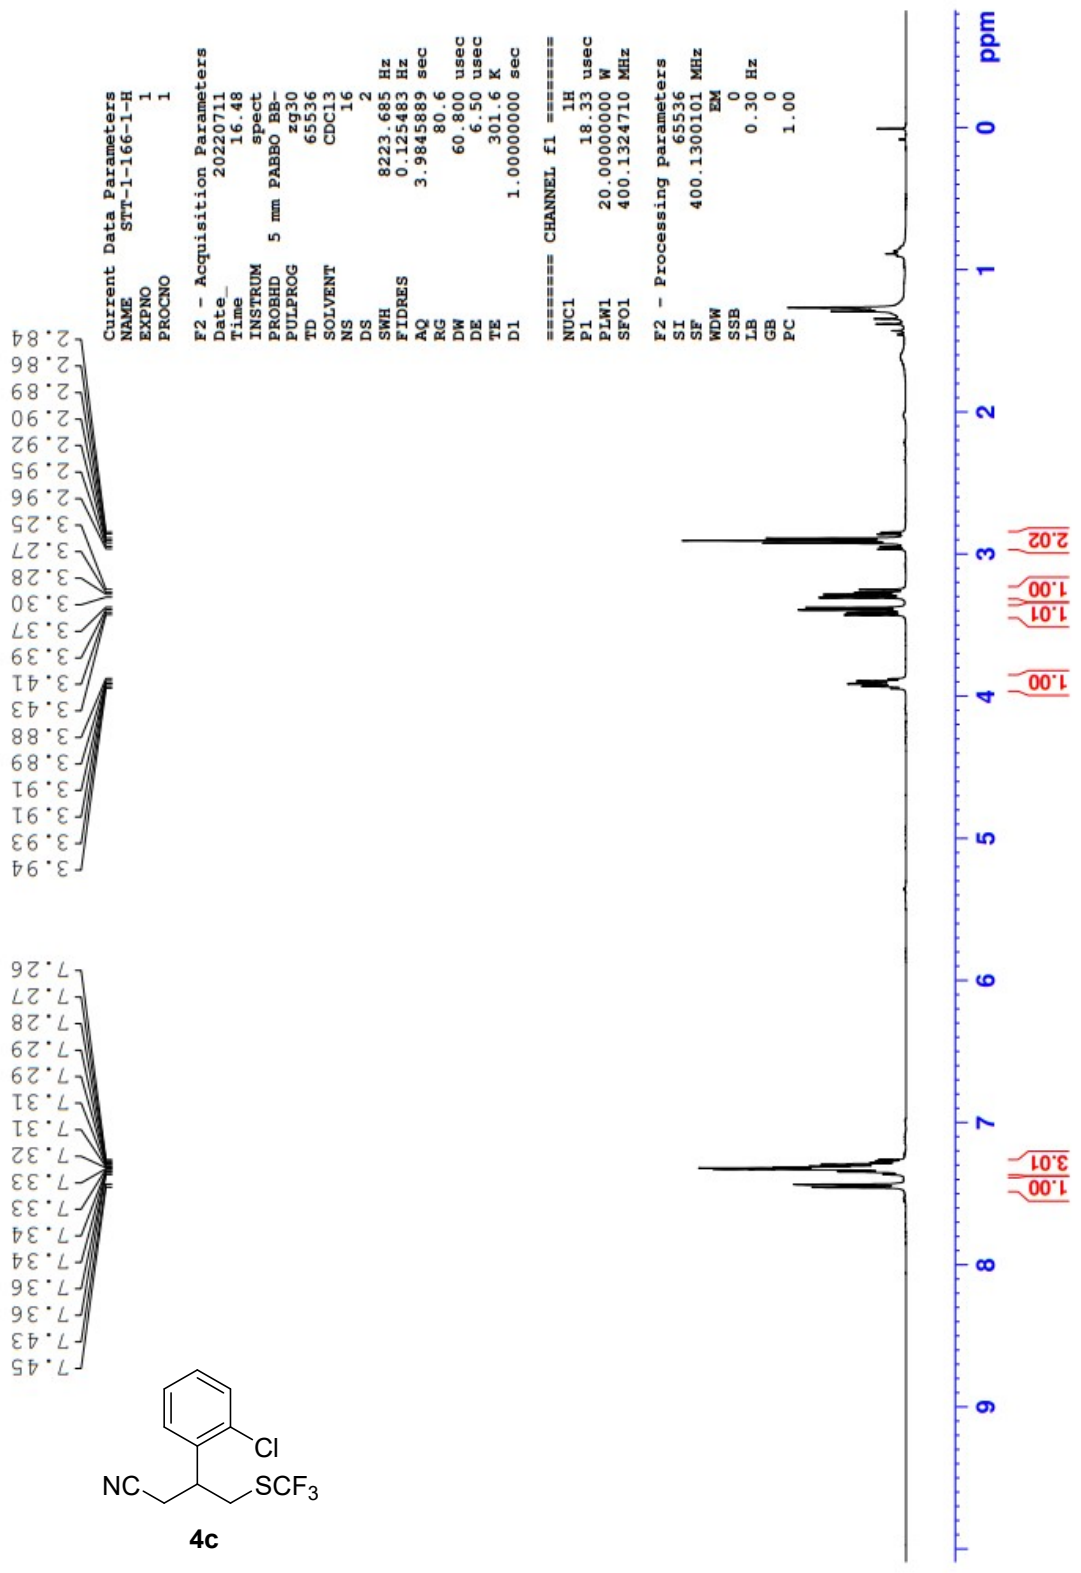

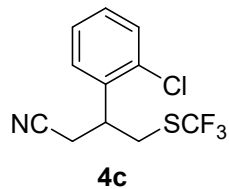

134.89  
 134.07  
 132.86  
 131.01  
 129.43  
 128.56  
 127.97  
 126.66  
 126.55  
 124.92  
 115.93

76.36  
 76.04  
 75.73

36.63  
 31.68  
 31.66

20.70  
 0.00

```

Current Data Parameters
NAME      STY-1-166-1-C
EXENO     1
PROCNO    1

F2 - Acquisition Parameters
Date_     20220719
Time      10.00
INSTRUM   spect
PROBHD    5 mm PABBO BB-
PULPROG   zgpg30
TD         65536
SOLVENT    CDCl3
NS         200
DS         4
SWH        24038.461 Hz
FIDRES     0.366798 Hz
AQ          1.3631488 sec
RG          161
DW          20.800 usec
DE          6.50 usec
TE          302.9 K
D1          2.00000000 sec
D11         0.03000000 sec

===== CHANNEL f1 =====
NUC1       13C
F1         13.34 usec
PLW1       57.00000000 W
SFO1       100.6228293 MHz

===== CHANNEL f2 =====
CPDPRG[2] waltz16
NUC2       1H
PCPD2      90.00 usec
PLW2       20.00000000 W
PLW12      0.82959998 W
PLW13      0.67198002 W
SFO2       400.1316005 MHz

F2 - Processing parameters
SI         32768
SF         100.6128708 MHz
WDW        EM
SSB        0
LB         1.00 Hz
GB         0
PC         1.40
  
```

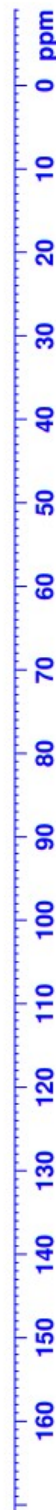

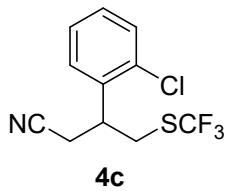

—40.85

```

Current Data Parameters
NAME      SPT-1-166-1-F
EXPNO     1
PROCNO    1

F2 - Acquisition Parameters
Date_     20220711
Time      16.50
INSTRUM   spect
PROBHD    5 mm PABBO BB-
PULPROG   zgfhigpn
TD         131072
SOLVENT    CDCl3
NS         16
DS         4
SWH       89285.711 Hz
FIDRES    0.681196 Hz
AQ         0.7340032 sec
RG         203
DE         5.600 usec
TE         301.8 K
D1         1.00000000 sec
D11        0.03000000 sec
D12        0.00002000 sec

===== CHANNEL f1 =====
NUC1       19F
P1         20.58 usec
PLW1       18.19700050 W
SF01       376.4607164 MHz

===== CHANNEL f2 =====
CPDPRG2    waltz16
NUC2       1H
PCPD2      90.00 usec
PLW2       20.00000000 W
PLW12      0.82959998 W
SF02       400.1316005 MHz

F2 - Processing parameters
SI         65536
SF         376.4983660 MHz
WDW        EM
SSB        0
LB         0.30 Hz
GB         0
PC         1.00
  
```

ppm

-160

-140

-120

-100

-80

-60

-40

-20

0

Current Data Parameters  
NAME STT-1-168-1-H  
EXPNO 1  
PROCNO 1

F2 - Acquisition Parameters  
Date\_ 20220719  
Time 10.23  
INSTRUM spect  
PROBHD 5 mm PABBO BB-  
PULPROG zg30  
TD 65536  
SOLVENT CDCl3  
NS 16  
DS 2  
SWH 8223.685 Hz  
FIDRES 0.125483 Hz  
AQ 3.9845889 sec  
RG 71.8  
DW 60.800 usec  
DE 6.50 usec  
TE 302.1 K  
D1 1.00000000 sec

==== CHANNEL f1 =====  
NUC1 1H  
P1 18.33 usec  
PLW1 20.00000000 W  
SF01 400.1324710 MHz

F2 - Processing parameters  
SI 65536  
SF 400.1300101 MHz  
WDW EM  
SSB 0  
LB 0.30 Hz  
GB 0  
PC 1.00

7.91  
7.88  
7.87  
7.86  
7.85  
7.73  
7.72  
7.56  
7.56  
7.56  
7.55  
7.54  
7.53  
7.52  
7.52  
7.51  
7.36  
7.35  
7.33  
7.33  
7.26

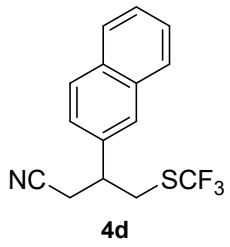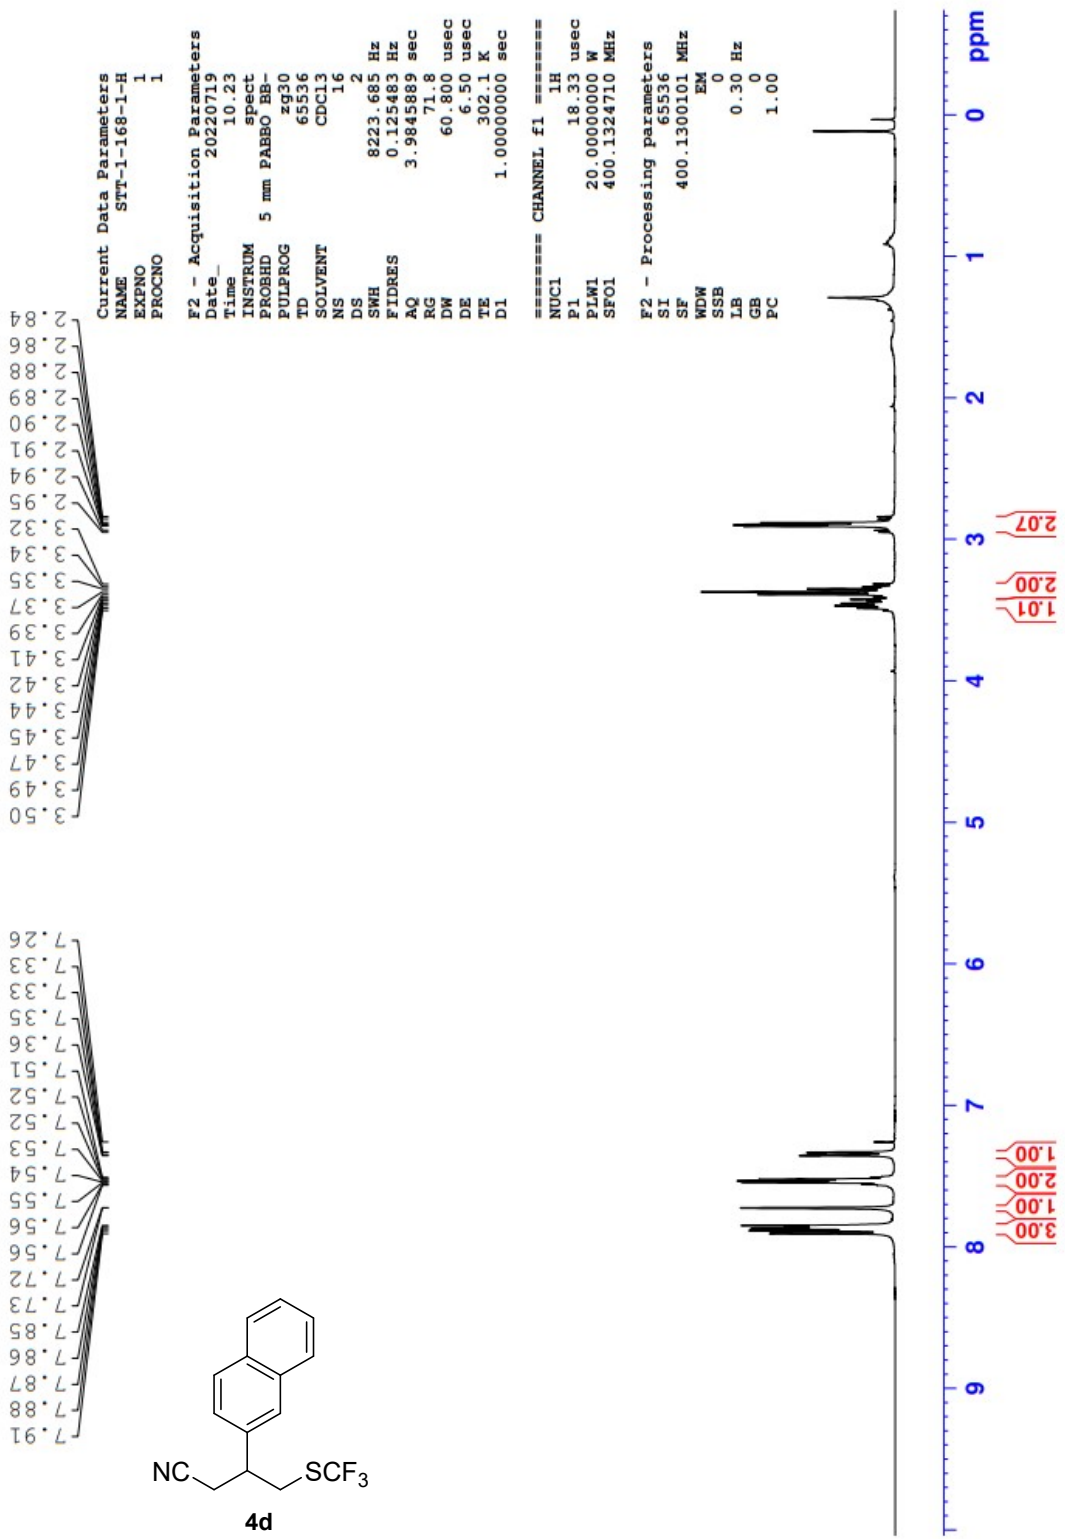



Current Data Parameters  
 NAME STT-1-168-1-C  
 EXPNO 1  
 PROCNO 1

F2 - Acquisition Parameters  
 Date\_ 20220719  
 Time 10.56  
 INSTRUM spect  
 PROBHD 5 mm PABBO BB-  
 PULPROG zgpg30  
 TD 65536  
 SOLVENT CDCl3  
 NS 200  
 DS 4  
 SWH 24038.461 Hz  
 FIDRES 0.366798 Hz  
 AQ 1.3631488 sec  
 RG 161  
 DW 20.800 usec  
 DE 6.50 usec  
 TE 303.0 K  
 D1 2.00000000 sec  
 D11 0.03000000 sec

==== CHANNEL f1 =====  
 NUC1 13C  
 P1 13.34 usec  
 PLW1 57.00000000 W  
 SFO1 100.6228293 MHz

==== CHANNEL f2 =====  
 CPDPRG[2] waitz16  
 NUC2 1H  
 P1 90.00 usec  
 PLW2 20.00000000 W  
 PLM12 0.82959998 W  
 PLM13 0.67198002 W  
 SFO2 400.1316005 MHz

F2 - Processing parameters  
 SI 32768  
 SF 100.6127690 MHz  
 WDW EM  
 SSB 0  
 LB 1.00 Hz  
 GB 0  
 PC 1.40

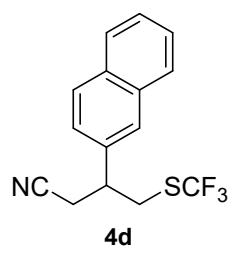

136.08  
 135.25  
 133.40  
 133.15  
 132.20  
 129.34  
 129.15  
 127.96  
 127.79  
 126.78  
 126.60  
 126.49  
 126.10  
 124.35  
 117.34

77.40  
 77.08  
 76.76

42.01

34.31  
 34.29

23.38

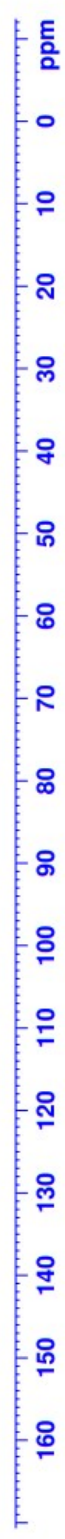

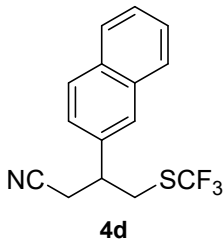

—40.80

```

Current Data Parameters
NAME      STT-1-168-1-F
EXPNO     1
PROCNO    1

F2 - Acquisition Parameters
Date_     20220711
Time      16.58
INSTRUM   spect
PROBHD    5 mm PABEO BB-
PULPROG   zgfgiqgn
TD         131072
SOLVENT    CDCl3
NS         16
DS         4
SWH        89285.711 Hz
FIDRES     0.681196 Hz
AQ         0.7340032 sec
RG         203
DW         5.600 usec
DE         6.50 usec
TE         301.7 K
D1         1.00000000 sec
D11        0.03000000 sec
D12        0.00002000 sec

===== CHANNEL f1 =====
NUC1       19F
P1         20.58 usec
PLW1       18.19700050 W
SFO1       376.4607164 MHz

===== CHANNEL f2 =====
CPDPRG[2] waltz16
NUC2       1H
PCPD2      90.00 usec
PLW2       20.00000000 W
PLW12      0.82559998 W
SFO2       400.1316005 MHz

F2 - Processing parameters
SI         65536
SF         376.4983660 MHz
WDW        EM
SSB        0
LB         0.30 Hz
GB         0
PC         1.00
  
```

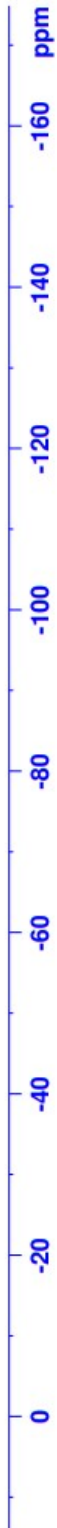

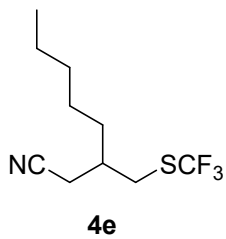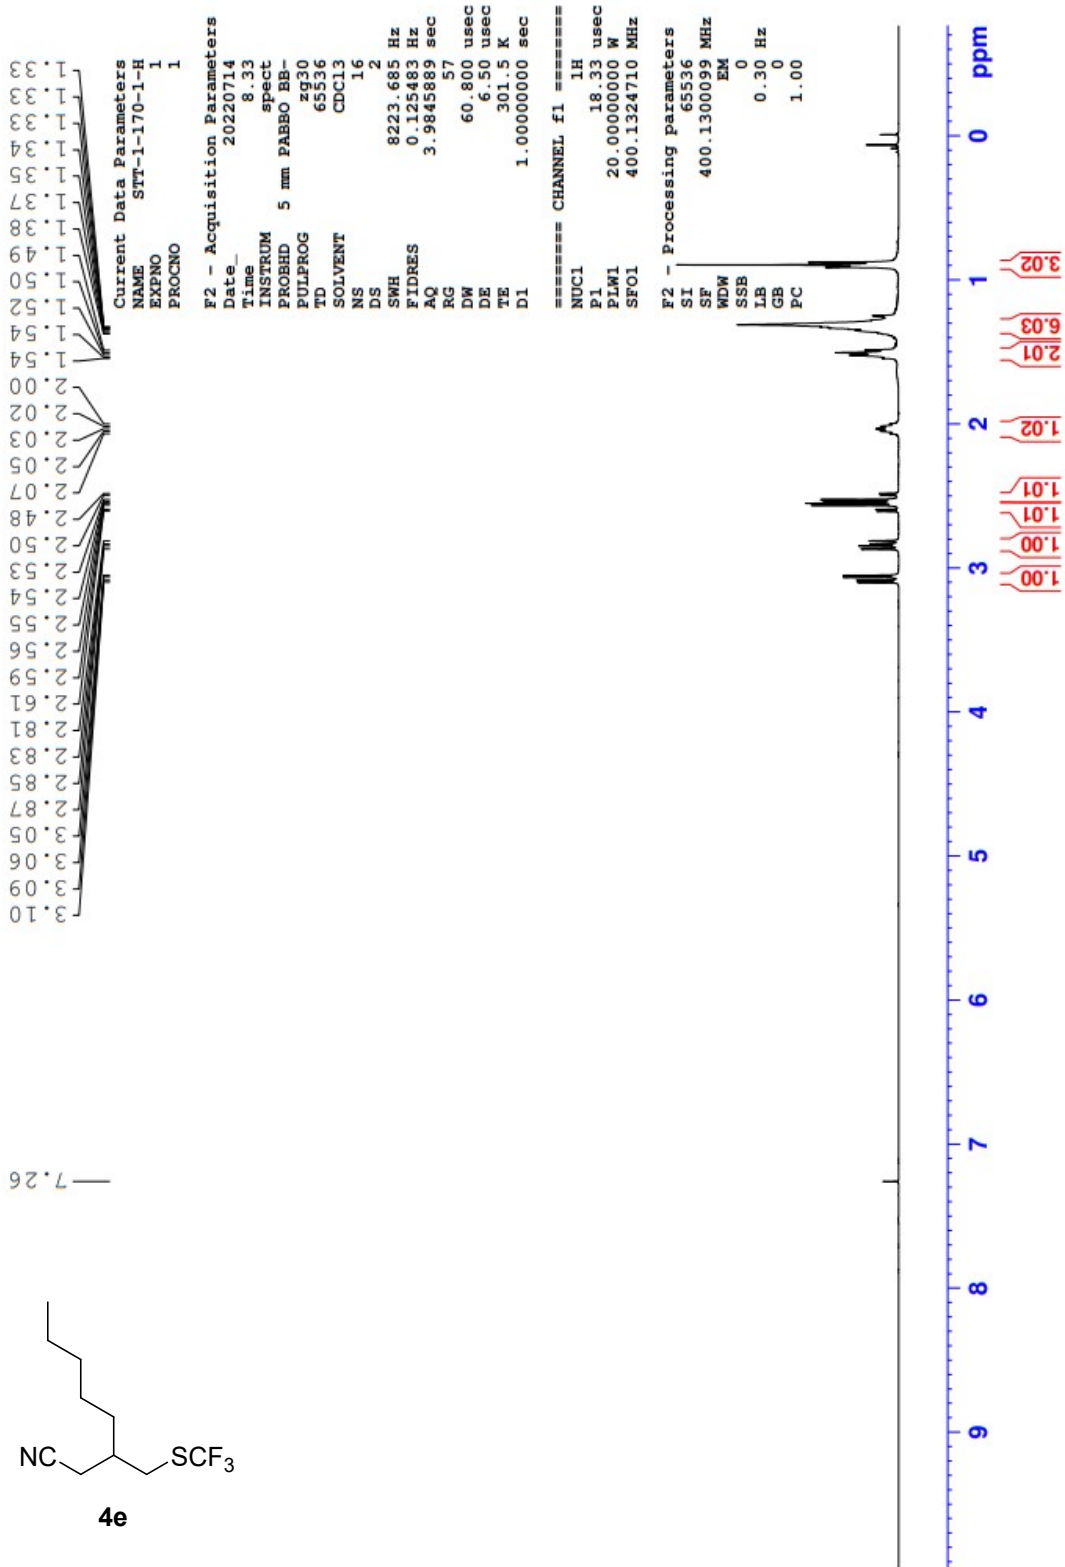

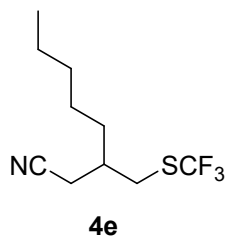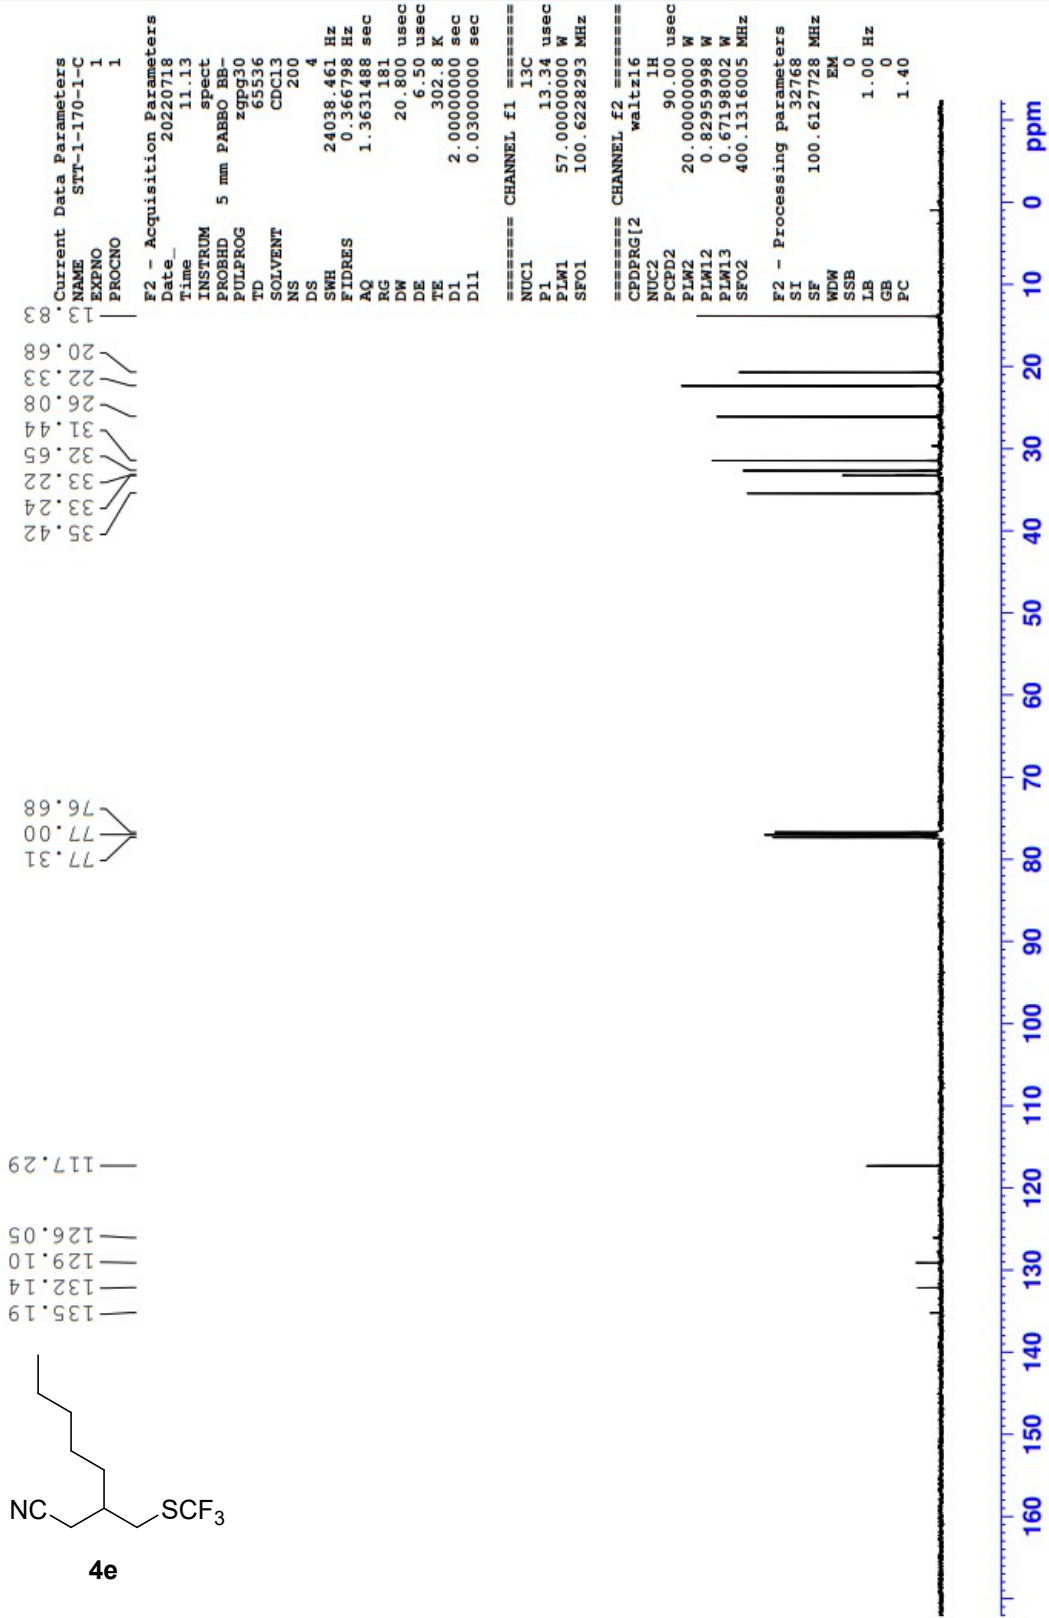

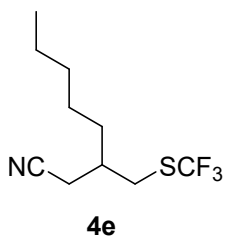

—40.91

```

Current Data Parameters
NAME      STW-1-170-1-F
EXPNO     1
PROCNO    1

F2 - Acquisition Parameters
Date_     20220714
Time      8.35
INSTRUM   spect
PROBHD    5 mm PABBO BB-
PULPROG   zgfh1gn
TD         131072
SOLVENT   CDCl3
NS         16
DS         4
SWH        89285.711 Hz
FIDRES     0.681196 Hz
AQ         0.7340032 sec
RG         203
DW         5.600 usec
DE         6.50 usec
TE         301.7 K
D1         1.00000000 sec
D11        0.03000000 sec
D12        0.00002000 sec

===== CHANNEL f1 =====
NUC1       19F
P1         20.58 usec
PLM1       18.13700050 W
SFO1       376.4607164 MHz

===== CHANNEL f2 =====
CPDPRG[2] waltz16
NUC2       1H
PCPD2      90.00 usec
PLM2       20.00000000 W
PLM12      0.82959998 W
SFO2       400.1316005 MHz

F2 - Processing parameters
SI         65536
SF         376.4983660 MHz
WDW        EM
SSB        0
LB         0.30 Hz
GB         0
PC         1.00

```

0 -20 -40 -60 -80 -100 -120 -140 -160 ppm

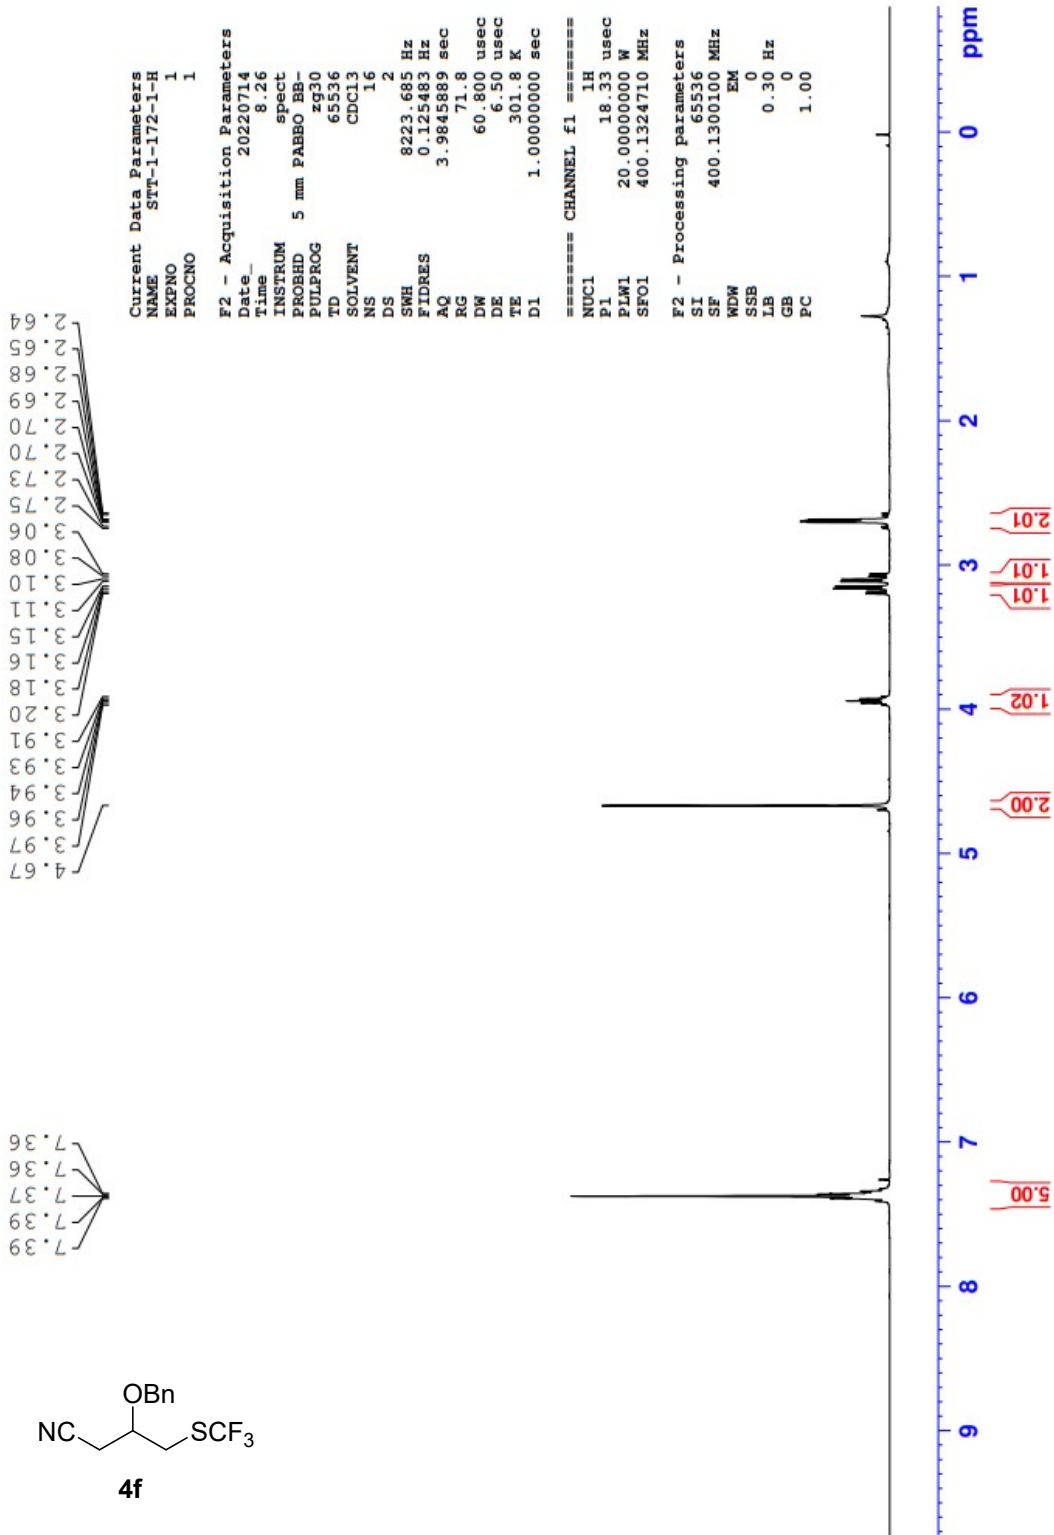

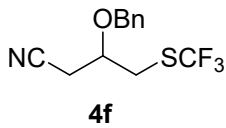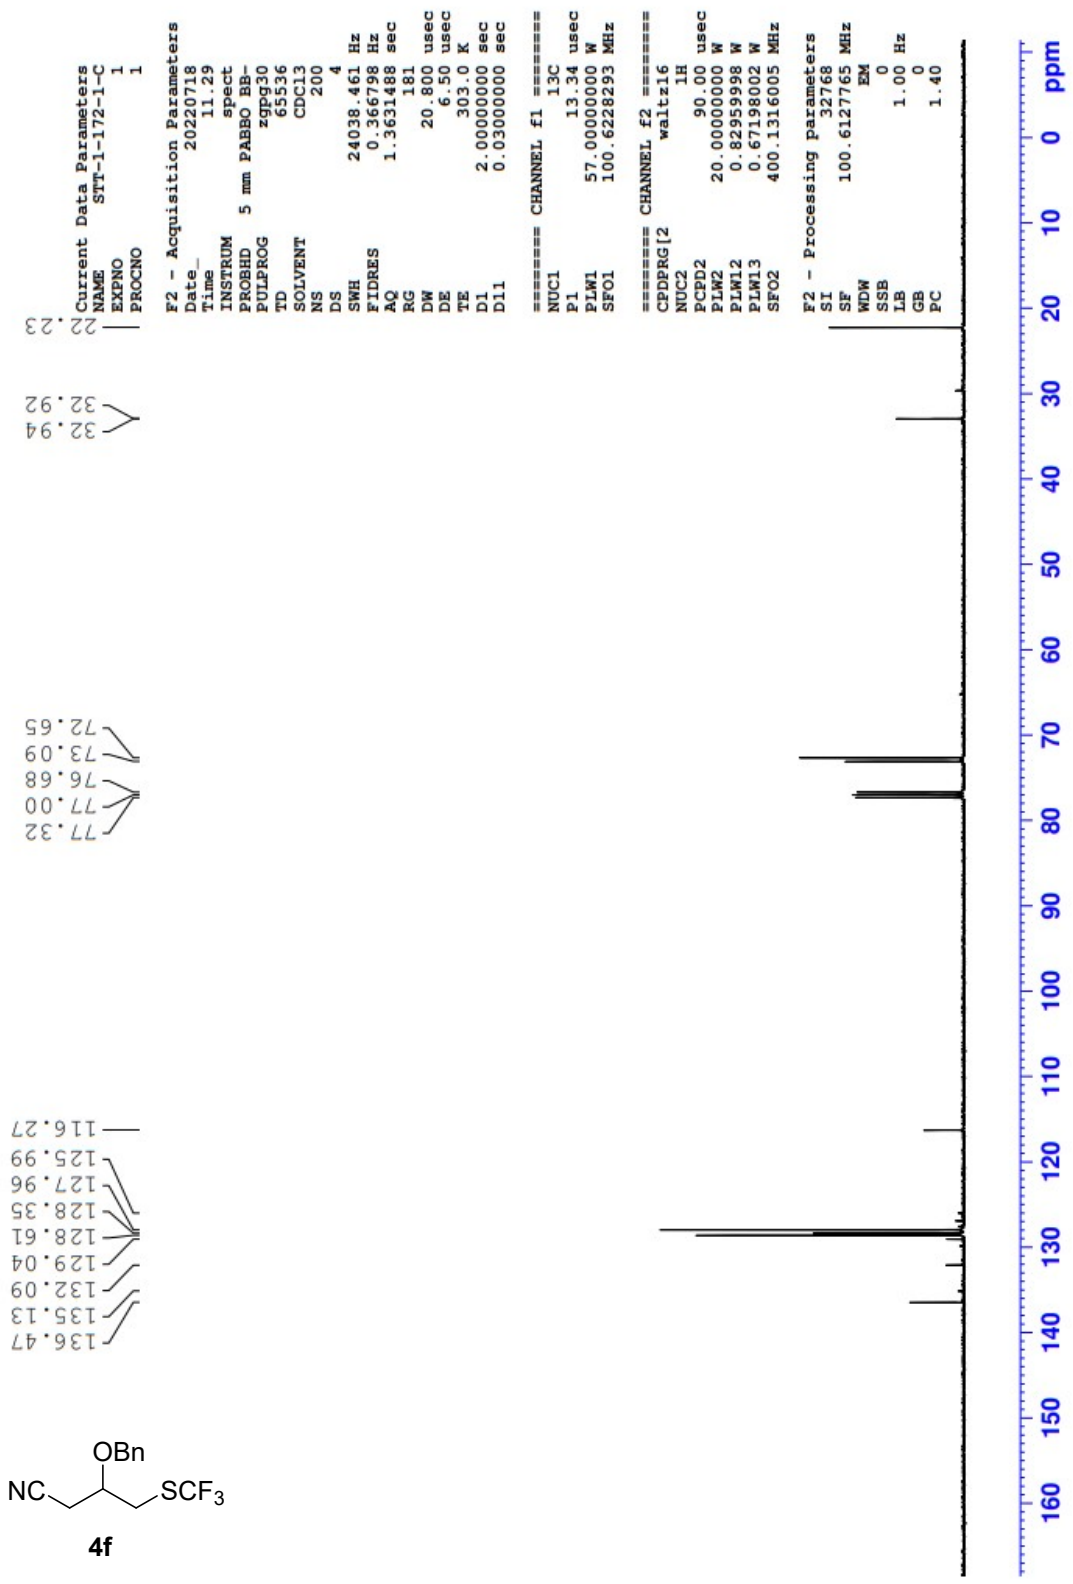



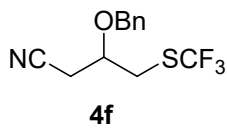

— -41.04

```

Current Data Parameters
NAME      STT-1-172-1-f
EXPNO     1
PROCNO    1

F2 - Acquisition Parameters
Date_     20220714
Time      8.28
INSTRUM   spect
PROBHD    5 mm PABBO BB-
PULPROG   zgfg19gn
TD         131072
SOLVENT   CDC13
NS         16
DS         4
SWH        89285.711 Hz
FIDRES     0.881196 Hz
AQ          0.7340032 sec
RG          203
DE          5.600 usec
TE          301.9 K
D1          1.00000000 sec
D11         0.03000000 sec
D12         0.00002000 sec

===== CHANNEL f1 =====
NUC1       19F
P1         20.58 usec
PLW1       18.19700050 W
SF01       376.4607164 MHz

===== CHANNEL f2 =====
CPDPRG[2]  waltz16
NUC2       1H
PCPD2      90.00 usec
PLW2       20.00000000 W
PLW12      0.82959998 W
SF02       400.1316005 MHz

F2 - Processing parameters
SI          65536
SF          376.4983660 MHz
WDW         EM
SSB         0
LB          0.30 Hz
GB          0
PC          1.00
  
```

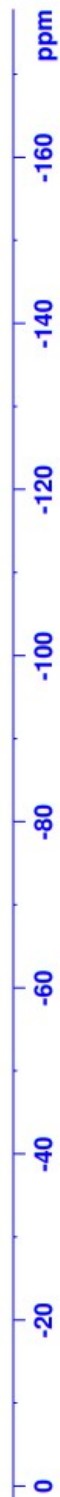

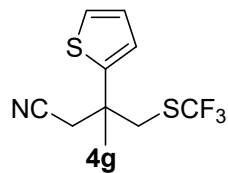

7.29  
7.29  
7.28  
7.28  
7.28  
7.26  
7.01  
7.00  
6.99  
6.98  
6.98  
6.97  
6.97  
6.97

3.39  
3.36  
3.32  
3.29  
2.87  
2.86

1.70

Current Data Parameters  
 NAME STT-1-174-1-H  
 EXPNO 1  
 PROCNO 1

F2 - Acquisition Parameters  
 Date\_ 20220718  
 Time 10.54  
 INSTRUM spect  
 PROBHD 5 mm PABEO BB-  
 PULPROG zg30  
 TD 65536  
 SOLVENT CDCl3  
 NS 16  
 DS 2  
 SWH 8223.685 Hz  
 FIDRES 0.125483 Hz  
 AQ 3.984589 sec  
 RG 71.8  
 DW 60.800 usec  
 DE 6.50 usec  
 TE 301.6 K  
 D1 1.00000000 sec

==== CHANNEL f1 =====  
 NUC1 1H  
 P1 18.33 usec  
 PLW1 20.0000000 W  
 SF01 400.1324710 MHz

F2 - Processing parameters  
 SI 65536  
 SF 400.1300101 MHz  
 WDW EM  
 SSB 0  
 LB 0.30 Hz  
 GB 0  
 PC 1.00

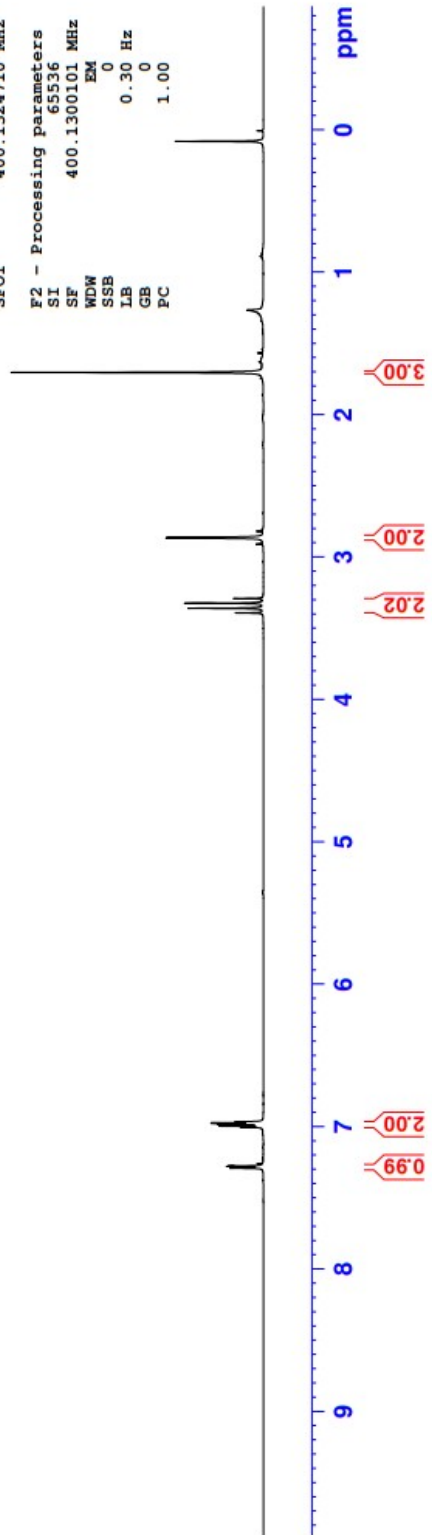

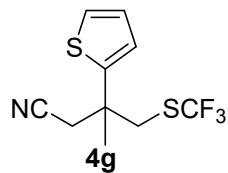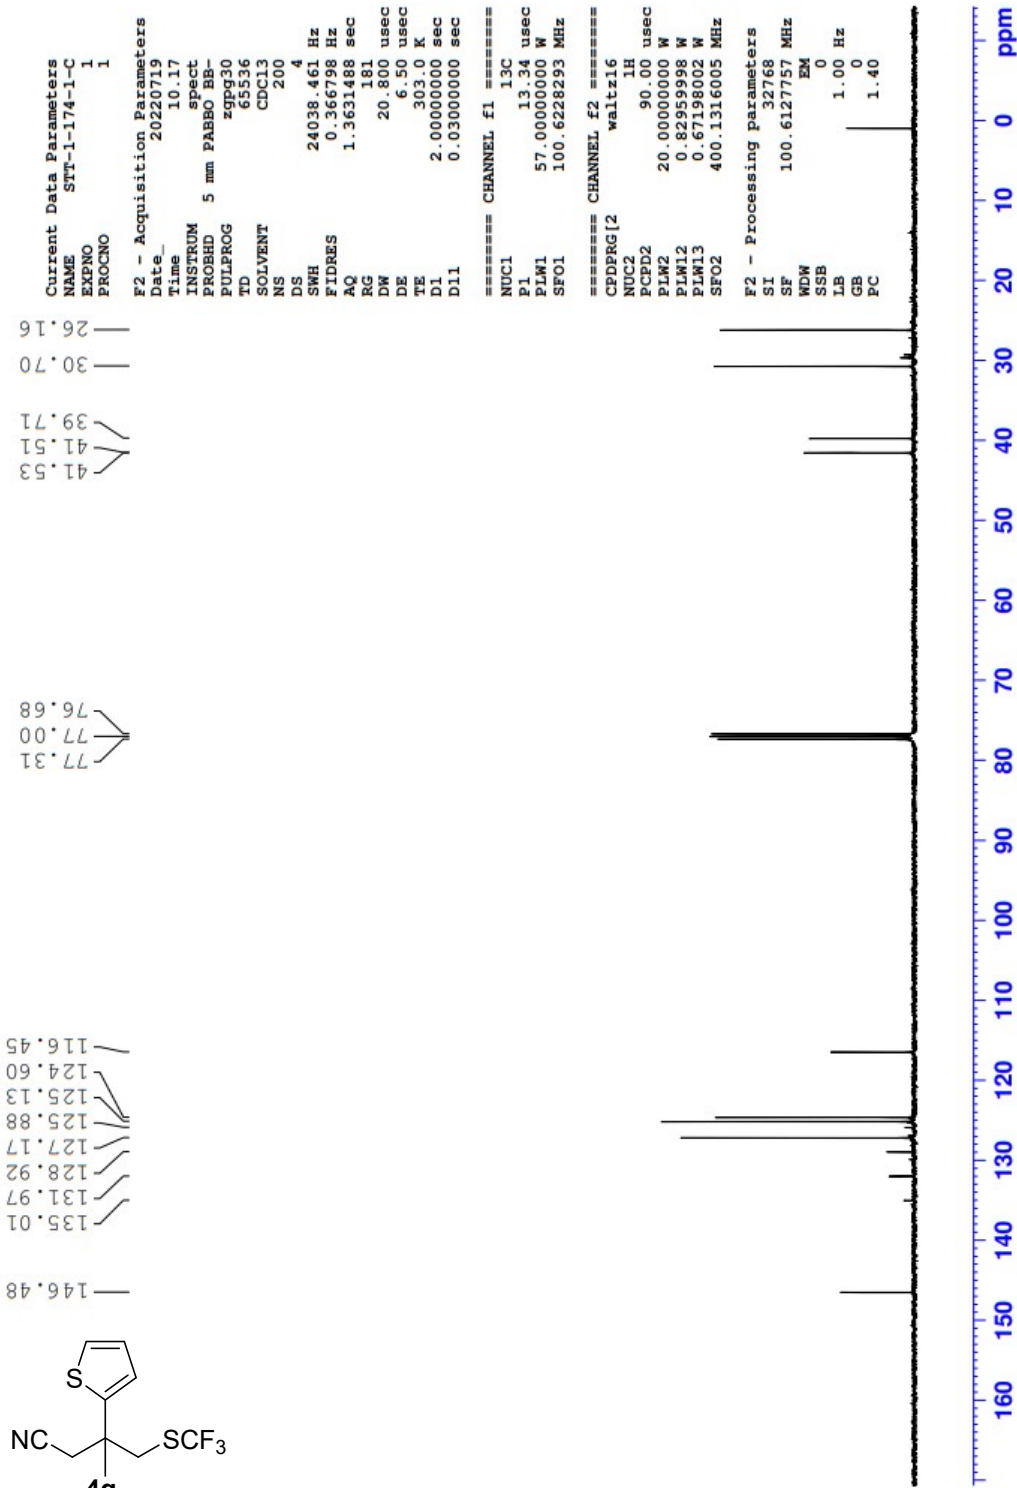

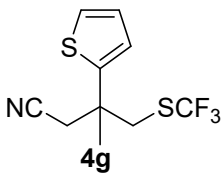

—40.93

```

Current Data Parameters
NAME      STW-1-174-1-F
EXPNO    1
PROCNO   1

F2 - Acquisition Parameters
Date_    20220718
Time     10.56
INSTRUM  spect
PROBHD   5 mm PABBO BB-
PULPROG  zgfgn
TD       131072
SOLVENT  CDCl3
NS       16
DS       4
SWH      89285.711 Hz
FIDRES   0.681196 Hz
AQ       0.7340032 sec
RG       203
DW       5.600 usec
DE       6.50 usec
TE       301.8 K
D1       1.00000000 sec
D11      0.03000000 sec
D12      0.00002000 sec

===== CHANNEL f1 =====
NUC1     19F
P1       20.58 usec
PLW1     18.19700050 W
SFO1     376.4607164 MHz

===== CHANNEL f2 =====
CPDPRG2  waltz16
NUC2     1H
PCPD2    90.00 usec
PLW2     20.00000000 W
PLW12    0.82959998 W
SFO2     400.1316005 MHz

F2 - Processing parameters
SI       65536
SF       376.4983660 MHz
WDW      EM
SSB      0
LB       0.30 Hz
GB       0
PC       1.00
  
```

ppm

-160

-140

-120

-100

-80

-60

-40

-20

0

0.00

3.32  
3.30  
3.28  
3.27  
3.25  
3.24  
3.22  
3.21  
3.19  
3.17  
3.16  
3.14  
2.89  
2.88  
2.85  
2.84  
2.83  
2.81  
2.78  
2.77

7.41  
7.41  
7.40  
7.39  
7.39  
7.37  
7.35  
7.35  
7.34  
7.33  
7.31  
7.27  
7.27  
7.26  
7.25  
6.87  
6.73  
6.59

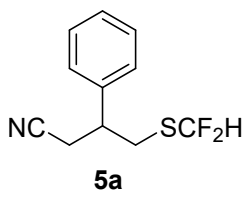

Current Data Parameters  
 NAME STY-2-6-1-H  
 EXPNO 1  
 PROCNO 1

F2 - Acquisition Parameters  
 Date\_ 20221005  
 Time 8.37  
 INSTRUM spect  
 PROBHD 5 mm PABBO BB-  
 PULPROG zg30  
 TD 65536  
 SOLVENT CDCl3  
 NS 16  
 DS 2  
 SWH 8223.685 Hz  
 FIDRES 0.125483 Hz  
 AQ 3.9845889 sec  
 RG 144  
 DW 60.800 usec  
 DE 6.50 usec  
 TE 297.6 K  
 D1 1.00000000 sec

==== CHANNEL f1 =====  
 NUC1 1H  
 P1 17.44 usec  
 PLW1 20.0000000 W  
 SFO1 400.1324710 MHz

F2 - Processing parameters  
 SI 65536  
 SF 400.1300107 MHz  
 WDW EM  
 SSB 0  
 LB 0.30 Hz  
 GB 0  
 PC 1.00

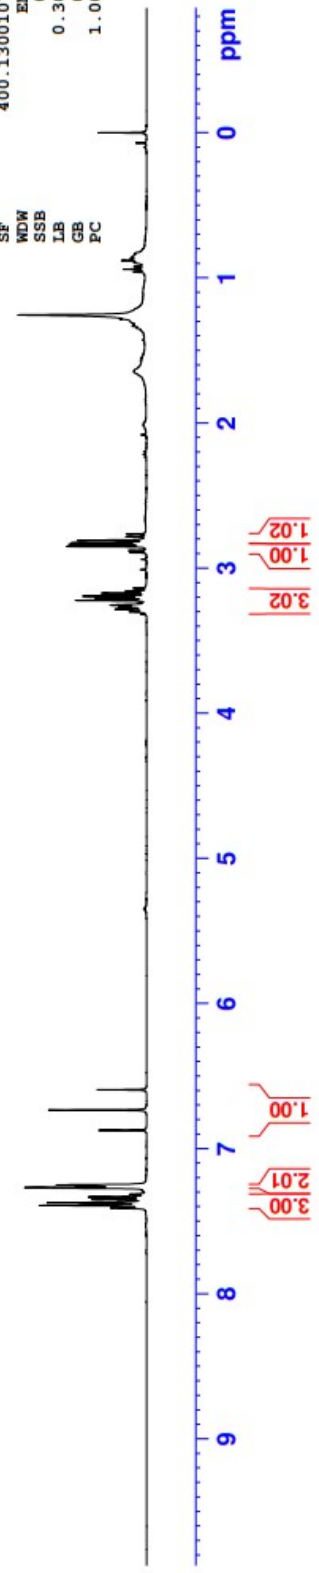

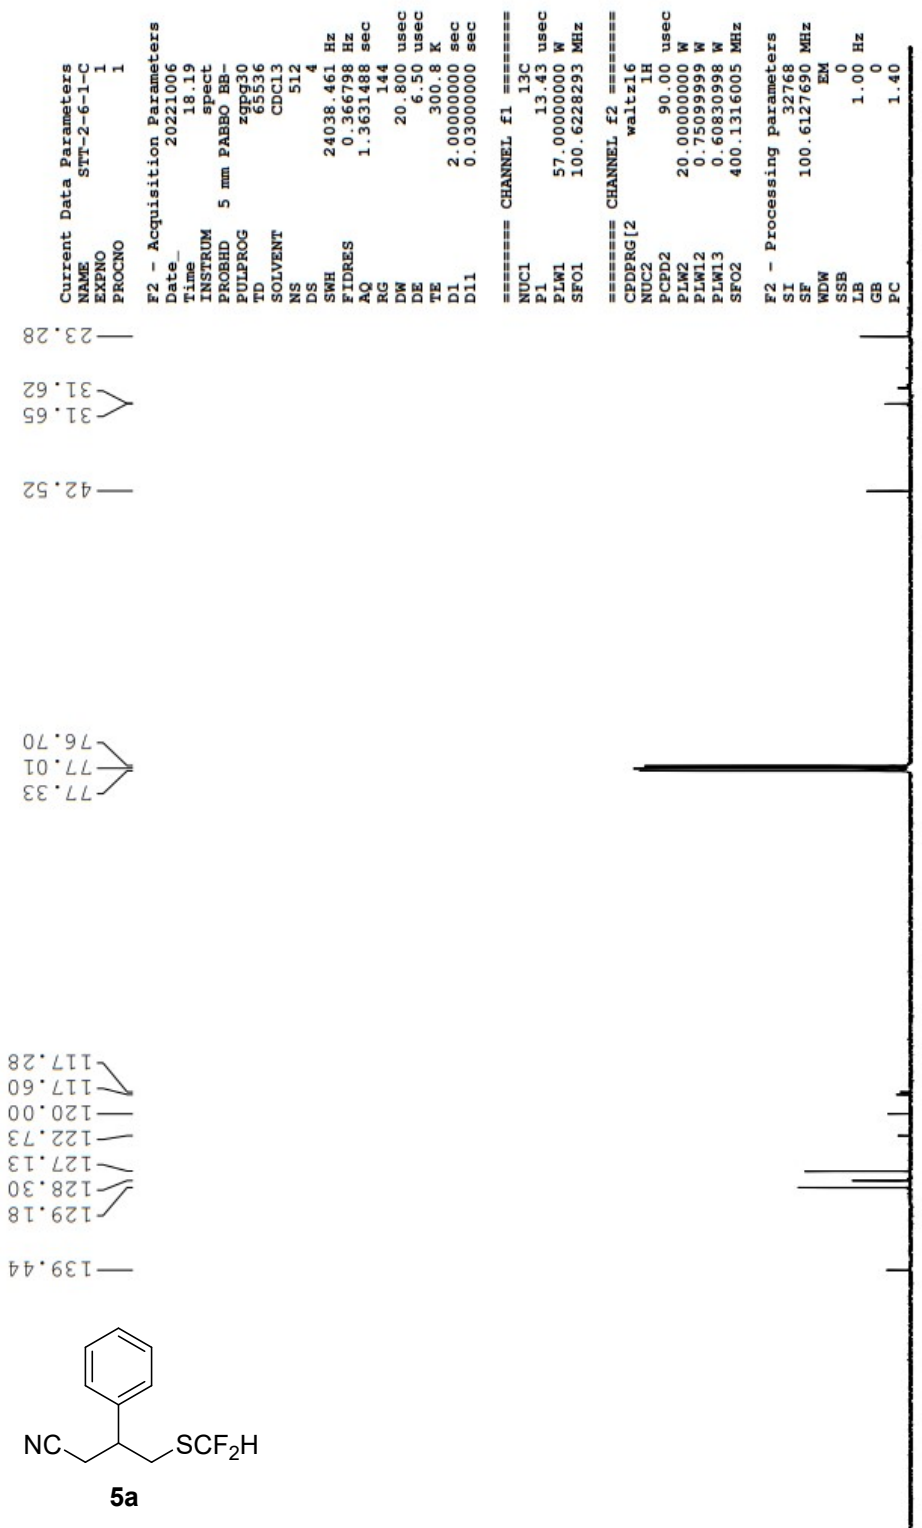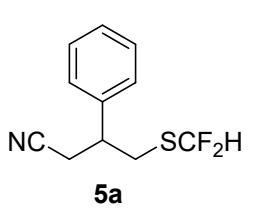

91.52  
92.15  
92.77  
93.41

Current Data Parameters  
NAME SFT-2-6-1-F  
EXPNO 1  
PROCNO 1

F2 - Acquisition Parameters  
Date\_ 20221006  
Time 17.09  
INSTRUM spect  
PROBHD 5 mm PABBO BE-  
PULPROG zgfg1gcn  
TD 131072  
SOLVENT CDCl3  
NS 16  
DS 4  
SWH 89285.711 Hz  
FIDRES 0.681196 Hz  
AQ 0.7340032 sec  
RG 203  
DW 5.600 usec  
DE 6.50 usec  
TE 297.3 K  
D1 1.00000000 sec  
D11 0.03000000 sec  
D12 0.00002000 sec

===== CHANNEL f1 =====  
NUC1 19F  
P1 22.22 usec  
PLW1 18.19700050 W  
SFO1 376.4607164 MHz

===== CHANNEL f2 =====  
CPDPRG2 waitz16  
NUC2 1H  
PCPD2 90.00 usec  
PLW2 20.00000000 W  
PLW12 0.75099999 W  
SFO2 400.1316005 MHz

F2 - Processing parameters  
SI 65536  
SF 376.4983660 MHz  
WDW EM  
SSB 0  
LB 0.30 Hz  
GB 0  
PC 1.00

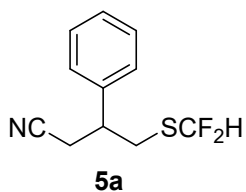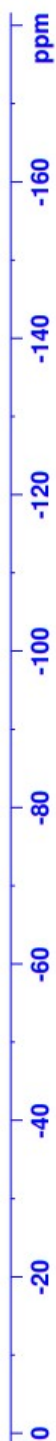



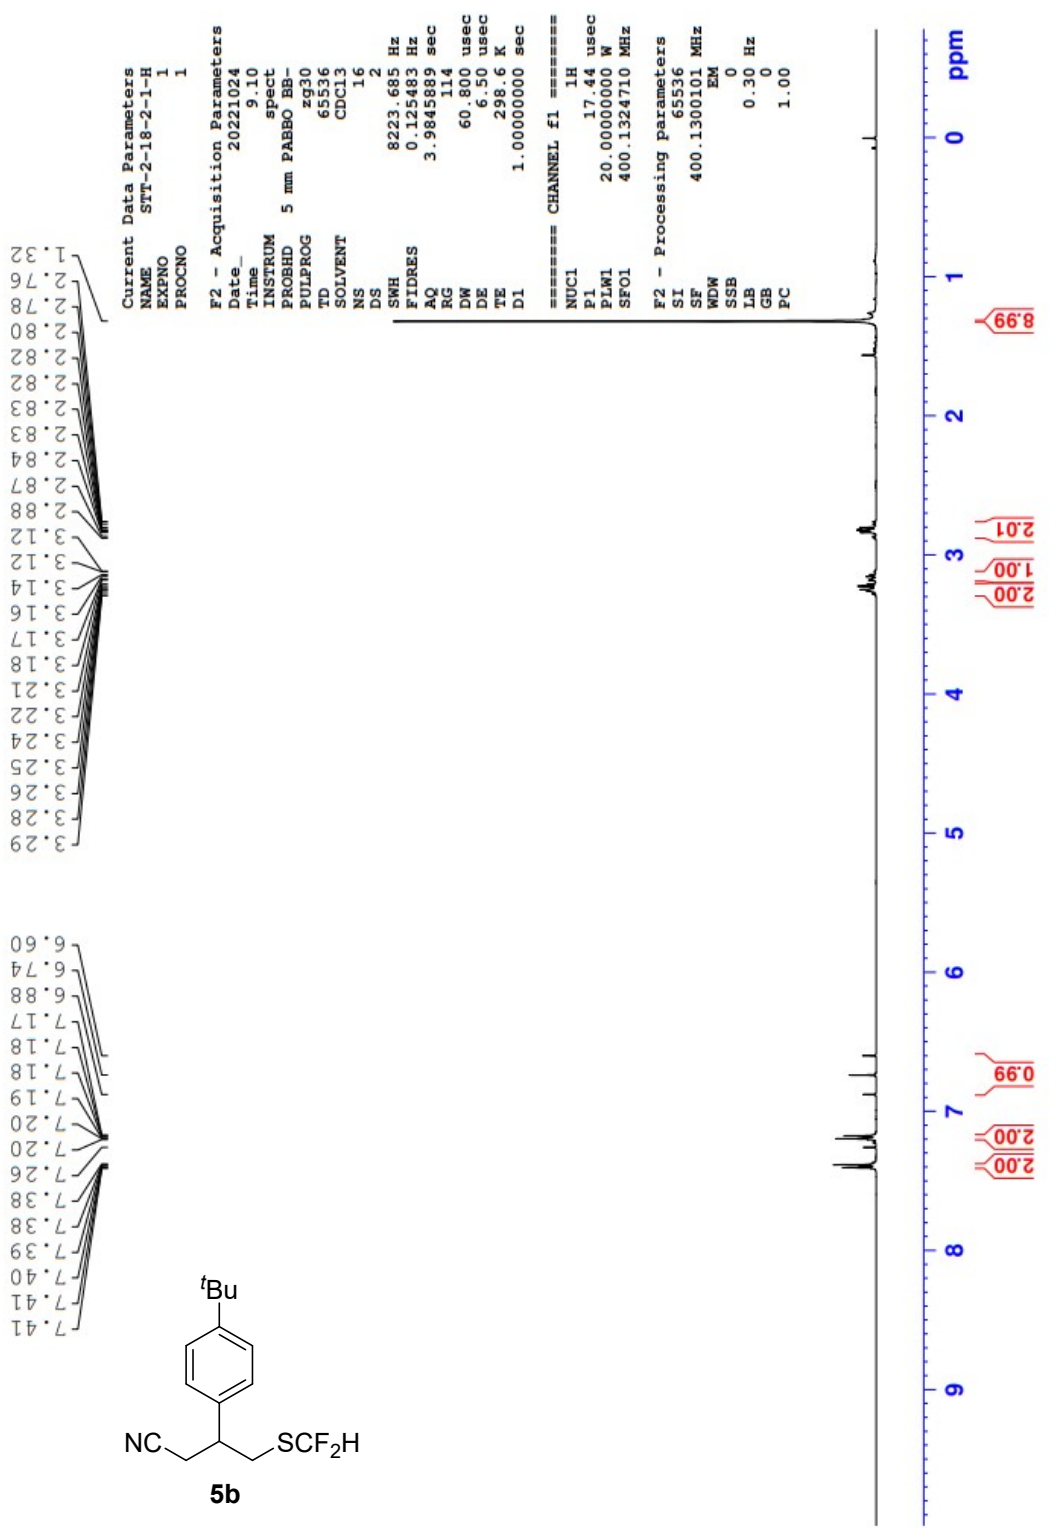

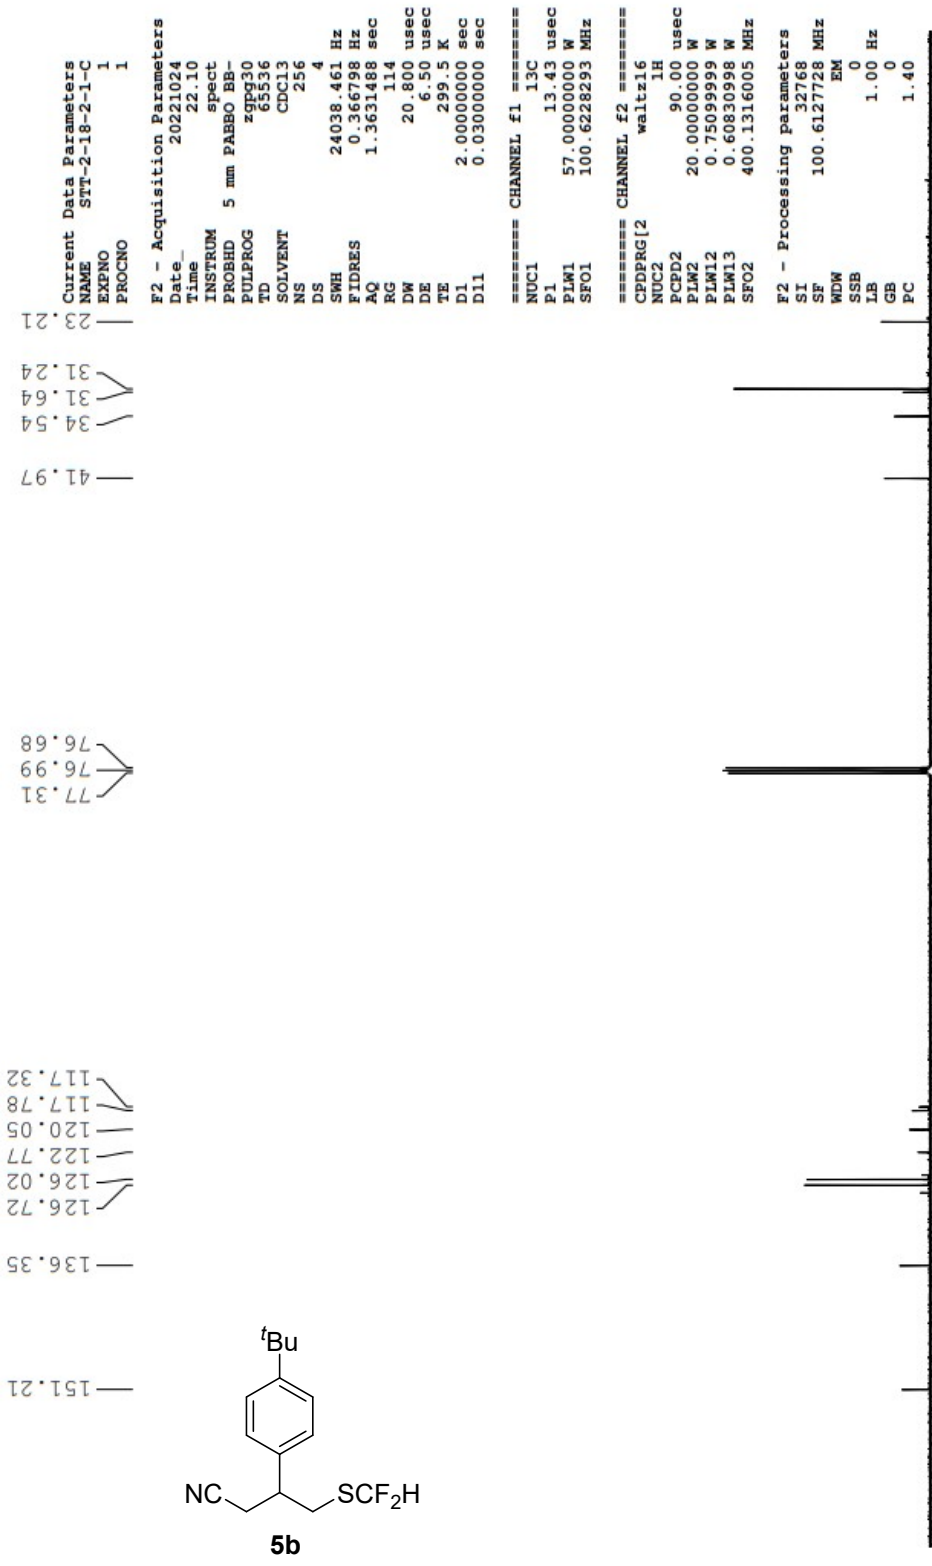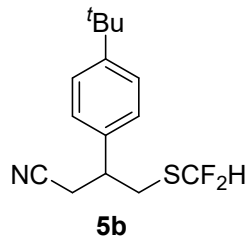

-93.41  
-92.77  
-92.06  
-91.42

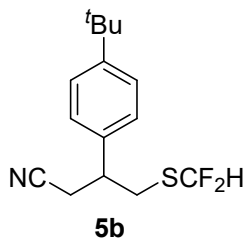

```
Current Data Parameters
NAME STW-2-18-2-1-F
EXPNO 1
PROCNO 1

F2 - Acquisition Parameters
Date_ 20221024
Time 9.12
INSTRUM spect
PROBHD 5 mm PABBO BB-
PULPROG zgfglgn
TD 131072
SOLVENT CDCl3
NS 16
DS 4
SWH 89285.711 Hz
FIDRES 0.681196 Hz
AQ 0.7340032 sec
RG 203
DE 5.600 usec
TE 298.8 K
D1 1.00000000 sec
D11 0.03000000 sec
D12 0.00002000 sec

===== CHANNEL f1 =====
NUC1 19F
P1 22.22 usec
PLW1 18.19700050 W
SFO1 376.4607164 MHz

===== CHANNEL f2 =====
CPDPRG2 waltz16
NUC2 1H
PCPD2 90.00 usec
PLW2 20.00000000 W
PLW12 0.75099999 W
SFO2 400.1316005 MHz

F2 - Processing parameters
SI 65536
SF 376.4983660 MHz
WDW EM
SSB 0
LB 0.30 Hz
GB 0
PC 1.00
```

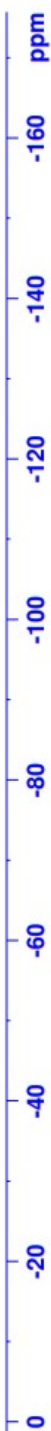

7.45  
7.43  
7.34  
7.34  
7.33  
7.33  
7.31  
7.30  
7.29  
7.29  
7.28  
7.28  
7.27  
7.27  
7.26  
6.93  
6.79  
6.65

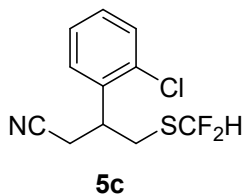

Current Data Parameters  
 NAME STT-2-17-2-1-H  
 EXPNO 1  
 PROCNO 1

F2 - Acquisition Parameters  
 Date\_ 20221021  
 Time 8.58  
 INSTRUM spect  
 PROBHD 5 mm PABBO BB-  
 PULPROG zg30  
 TD 65536  
 SOLVENT CDCl3  
 NS 16  
 DS 2  
 SWH 8223.685 Hz  
 FIDRES 0.125483 Hz  
 AQ 3.9845889 sec  
 RG 181  
 DW 60.800 usec  
 DE 6.50 usec  
 TE 298.6 K  
 D1 1.00000000 sec

==== CHANNEL f1 =====  
 NUC1 1H  
 P1 17.44 usec  
 PLW1 20.00000000 W  
 SF01 400.1324710 MHz

F2 - Processing parameters  
 SI 65536  
 SF 400.1300100 MHz  
 WDW EM  
 SSB 0  
 LB 0.30 Hz  
 GB 0  
 PC 1.00

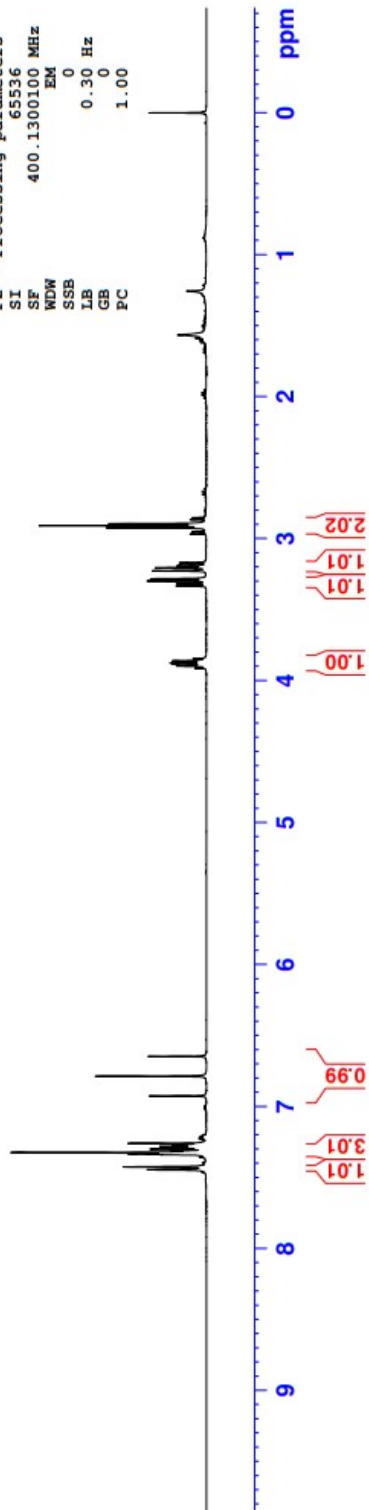

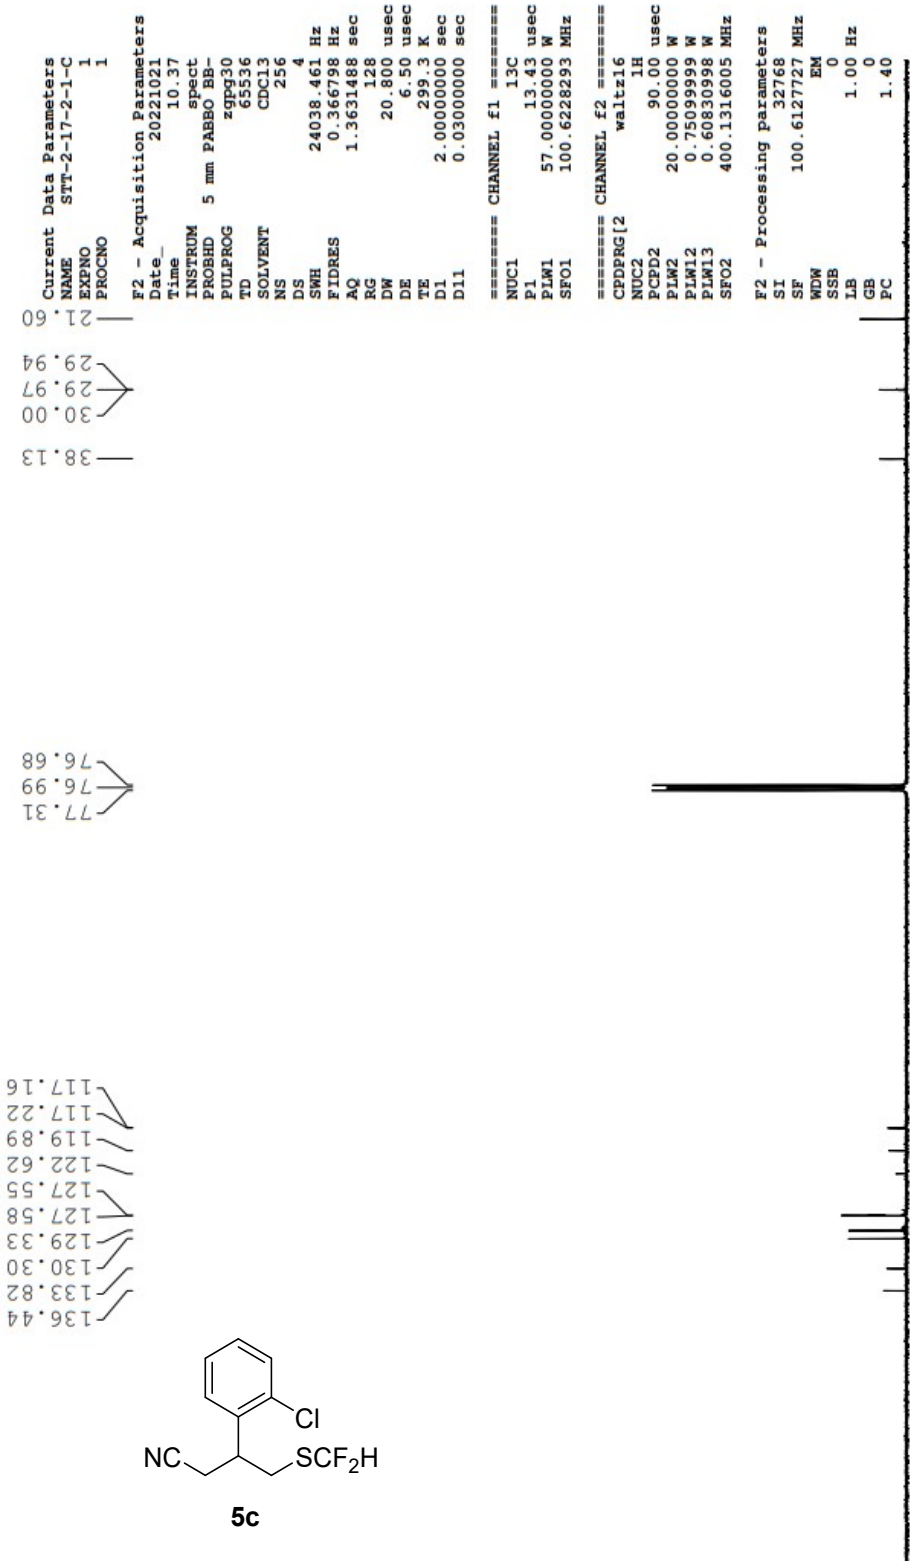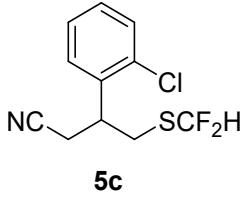

91.52  
92.16  
92.46  
93.10

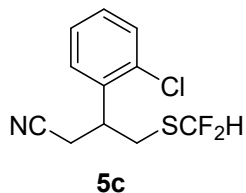

```

Current Data Parameters
NAME      STT-2-17-2-1-F
EXPNO    1
PROCNO   1

F2 - Acquisition Parameters
Date_    20221021
Time     9.00
INSTRUM  spect
PROBHD   5 mm PABBO BB-
PULPROG  zgfhigqn
TD        131072
SOLVENT  CDCl3
NS        16
DS        4
SWH       89285.711 Hz
FIDRES    0.681196 Hz
AQ         0.7340032 sec
RG         203
DW         5.600 usec
DE         6.50 usec
TE         298.8 K
D1         1.0000000 sec
D11        0.0300000 sec
D12        0.0000200 sec

===== CHANNEL f1 =====
NUC1      19F
P1         22.22 usec
PLW1      18.19700050 W
SFO1      376.4607164 MHz

===== CHANNEL f2 =====
CPDPRG[2  waltz16
NUC2       1H
PCPD2      90.00 usec
PLW2       20.0000000 W
PLW12      0.75099999 W
SFO2       400.1316005 MHz

F2 - Processing parameters
SI         65536
SF         376.4983660 MHz
WDW        EM
SSB        0
LB         0.30 Hz
GB         0
PC         1.00
  
```

0 -10 -20 -30 -40 -50 -60 -70 -80 -90 -100 -110 -120 -130 -140 -150 -160 ppm

7.26  
 6.66  
 6.80  
 6.94  
 3.05  
 3.04  
 3.01  
 3.00  
 2.78  
 2.76  
 2.75  
 2.72  
 2.60  
 2.59  
 2.56  
 2.55  
 2.54  
 2.52  
 2.49  
 2.48  
 2.05  
 2.03  
 2.02  
 2.00  
 1.98  
 1.59  
 1.54  
 1.53  
 1.52  
 1.50  
 1.48  
 1.36  
 1.35  
 1.33  
 1.31  
 1.26

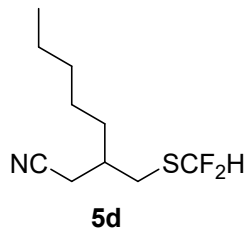

Current Data Parameters  
 NAME STT-2-18-1-1-H  
 EXPNO 1  
 PROCNO 1

F2 - Acquisition Parameters  
 Date\_ 20221022  
 Time 8.29  
 INSTRUM spect  
 PROBHD 5 mm PABBO RB-  
 PULPROG zg30  
 TD 65536  
 SOLVENT CDC13  
 NS 16  
 DS 2  
 SWH 8223.685 Hz  
 FIDRES 0.125483 Hz  
 AQ 3.9845889 sec  
 RG 90.5  
 DW 60.800 usec  
 DE 6.50 usec  
 TE 298.5 K  
 D1 1.00000000 sec

===== CHANNEL f1 =====  
 NUC1 1H  
 P1 17.44 usec  
 PLW1 20.00000000 W  
 SF01 400.1324710 MHz

F2 - Processing parameters  
 SI 65536  
 SF 400.1300104 MHz  
 WDW EM  
 SSB 0  
 LB 0.30 Hz  
 GB 0  
 PC 1.00

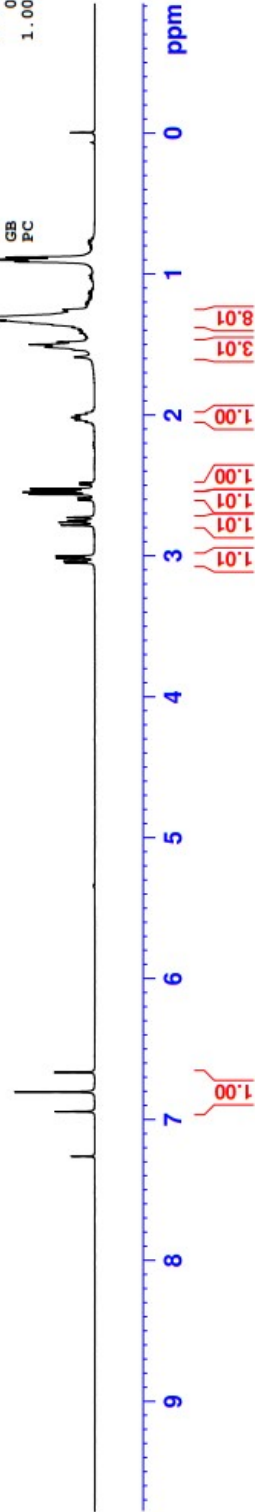



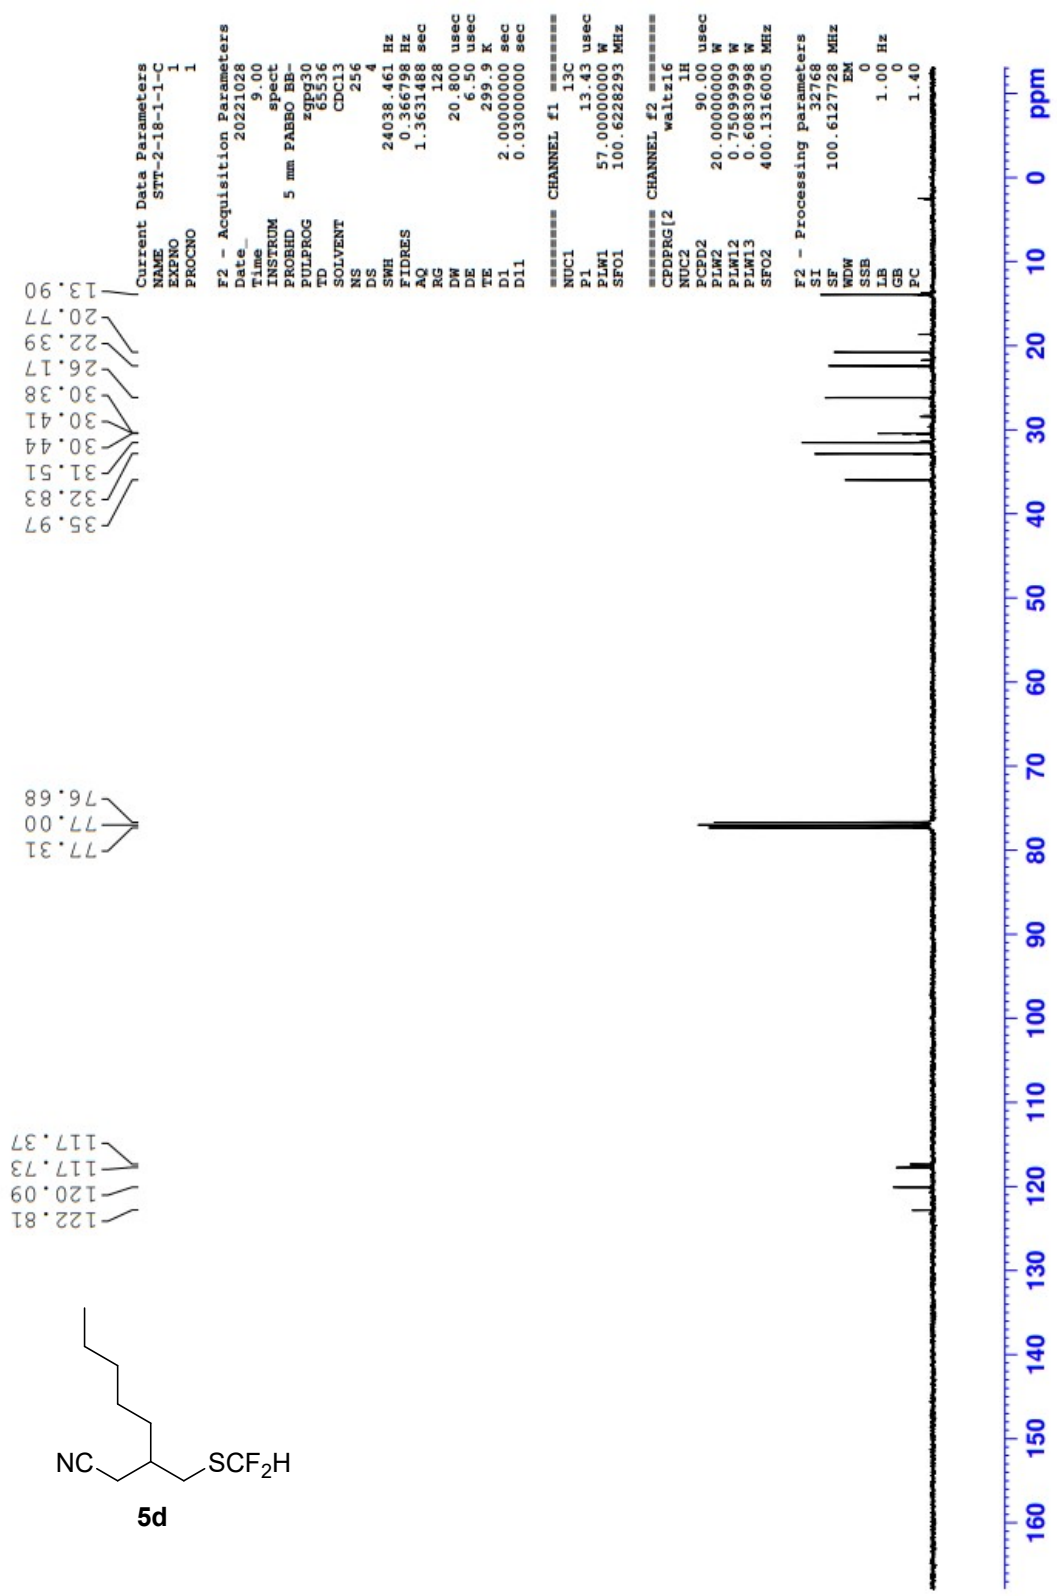

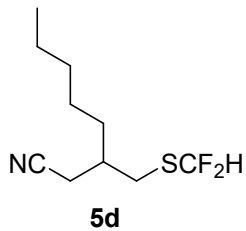

91.29  
91.93  
92.67  
93.31

```

Current Data Parameters
NAME      STT-2-18-1-1-F
EXPNO    1
PROCNO   1

F2 - Acquisition Parameters
Date_    20221022
Time     8.31
INSTRUM  spect
PROBHD   5 mm PABBO BB-
PULPROG  zgpg30
TD       131072
SOLVENT  CDCl3
NS       16
DS       4
SWH      89285.711 Hz
FIDRES   0.681196 Hz
AQ       0.7340032 sec
RG       203
DW       5.600 usec
DE       6.50 usec
TE       298.6 K
D1       1.00000000 sec
D11      0.03000000 sec
D12      0.00002000 sec

===== CHANNEL f1 =====
NUC1     19F
P1       22.22 usec
PLW1     18.19700050 W
SFO1     376.4607164 MHz

===== CHANNEL f2 =====
CPDPRG2  waitz16
NUC2     1H
PCPD2    90.00 usec
PLW2     20.00000000 W
PLW12    0.75099999 W
SFO2     400.1316005 MHz

F2 - Processing parameters
SI       65536
SF       376.4983660 MHz
WDW      EM
SSB      0
LB       0.30 Hz
GB       0
PC       1.00

```

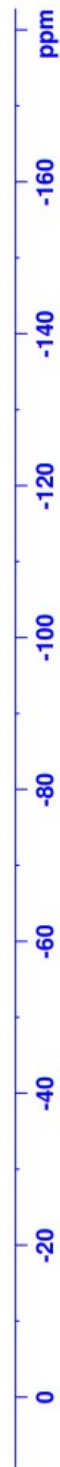

7.45  
7.44  
7.43  
7.43  
7.42  
7.42  
7.42  
7.40  
7.39  
7.38  
7.35  
7.35  
7.35  
7.34  
7.33  
7.33  
7.32  
7.31  
7.30  
7.26

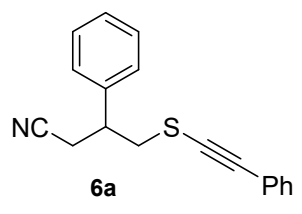

Current Data Parameters  
 NAME STT-1-185-1-H  
 EXPNO 5  
 PROCNO 1

F2 - Acquisition Parameters  
 Date\_ 20220819  
 Time 10.38  
 INSTRUM spect  
 PROBHD 5 mm PABBO BB-  
 PULPROG zg30  
 TD 65536  
 SOLVENT CDCl3  
 NS 16  
 DS 2  
 SWH 8223.685 Hz  
 FIDRES 0.125483 Hz  
 AQ 3.9845889 sec  
 RG 128  
 DW 60.800 usec  
 DE 6.50 usec  
 TE 298.0 K  
 D1 1.00000000 sec

==== CHANNEL f1 =====  
 NUC1 1H  
 P1 18.33 usec  
 PLW1 20.00000000 W  
 SF01 400.1324710 MHz

F2 - Processing parameters  
 SI 65536  
 SF 400.1300101 MHz  
 WDW EM  
 SSB 0  
 LB 0.30 Hz  
 GB 0  
 PC 1.00

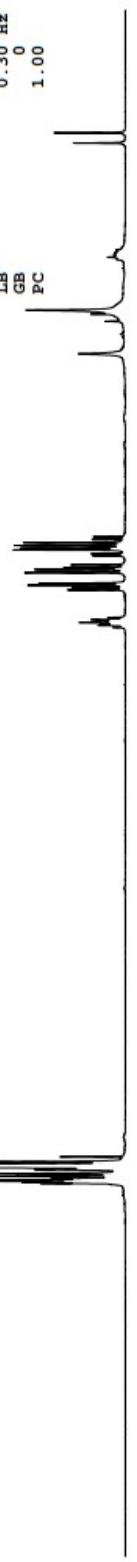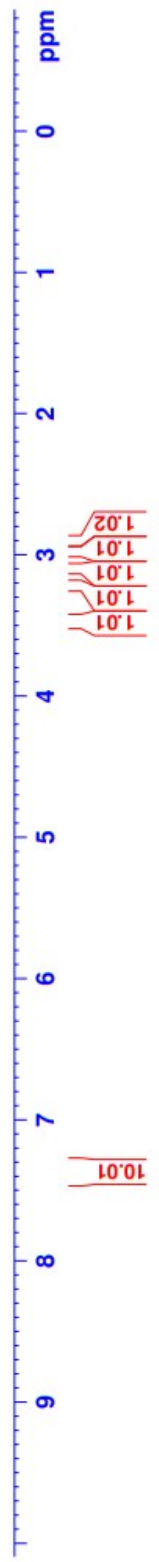

Current Data Parameters  
 NAME STT-1-185-1-C  
 EXPNO 5  
 PROCNO 1

F2 - Acquisition Parameters  
 Date\_ 20220819  
 Time 10.50  
 INSTRUM spect  
 PROBHD 5 mm PABBO BB-  
 PULPROG zgpg30  
 TD 65536  
 SOLVENT CDCl3  
 NS 170  
 DS 4  
 SWH 24038.461 Hz  
 FIDRES 0.366798 Hz  
 AQ 1.3631488 sec  
 RG 128  
 DW 20.800 usec  
 DE 6.50 usec  
 TE 299.2 K  
 D1 2.00000000 sec  
 D11 0.03000000 sec

=====  
 CHANNEL f1  
 NUC1 13C  
 P1 13.34 usec  
 PLW1 57.0000000 W  
 SF01 100.6228293 MHz

=====  
 CHANNEL f2  
 CPDPRG[2] waltz16  
 NUC2 1H  
 PCPD2 90.00 usec  
 PLW2 20.0000000 W  
 PLM12 0.82959998 W  
 PLM13 0.67198002 W  
 SF02 400.1316005 MHz

F2 - Processing parameters  
 SI 32768  
 SF 100.6127743 MHz  
 WDW EM  
 SSB 0  
 LB 1.00 Hz  
 GB 0  
 PC 1.40

41.63  
 39.91

77.52  
 77.31  
 76.99  
 76.68

94.12

139.56  
 131.54  
 129.11  
 128.43  
 128.35  
 128.17  
 127.24  
 122.86  
 117.81

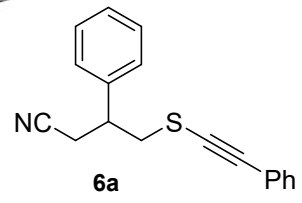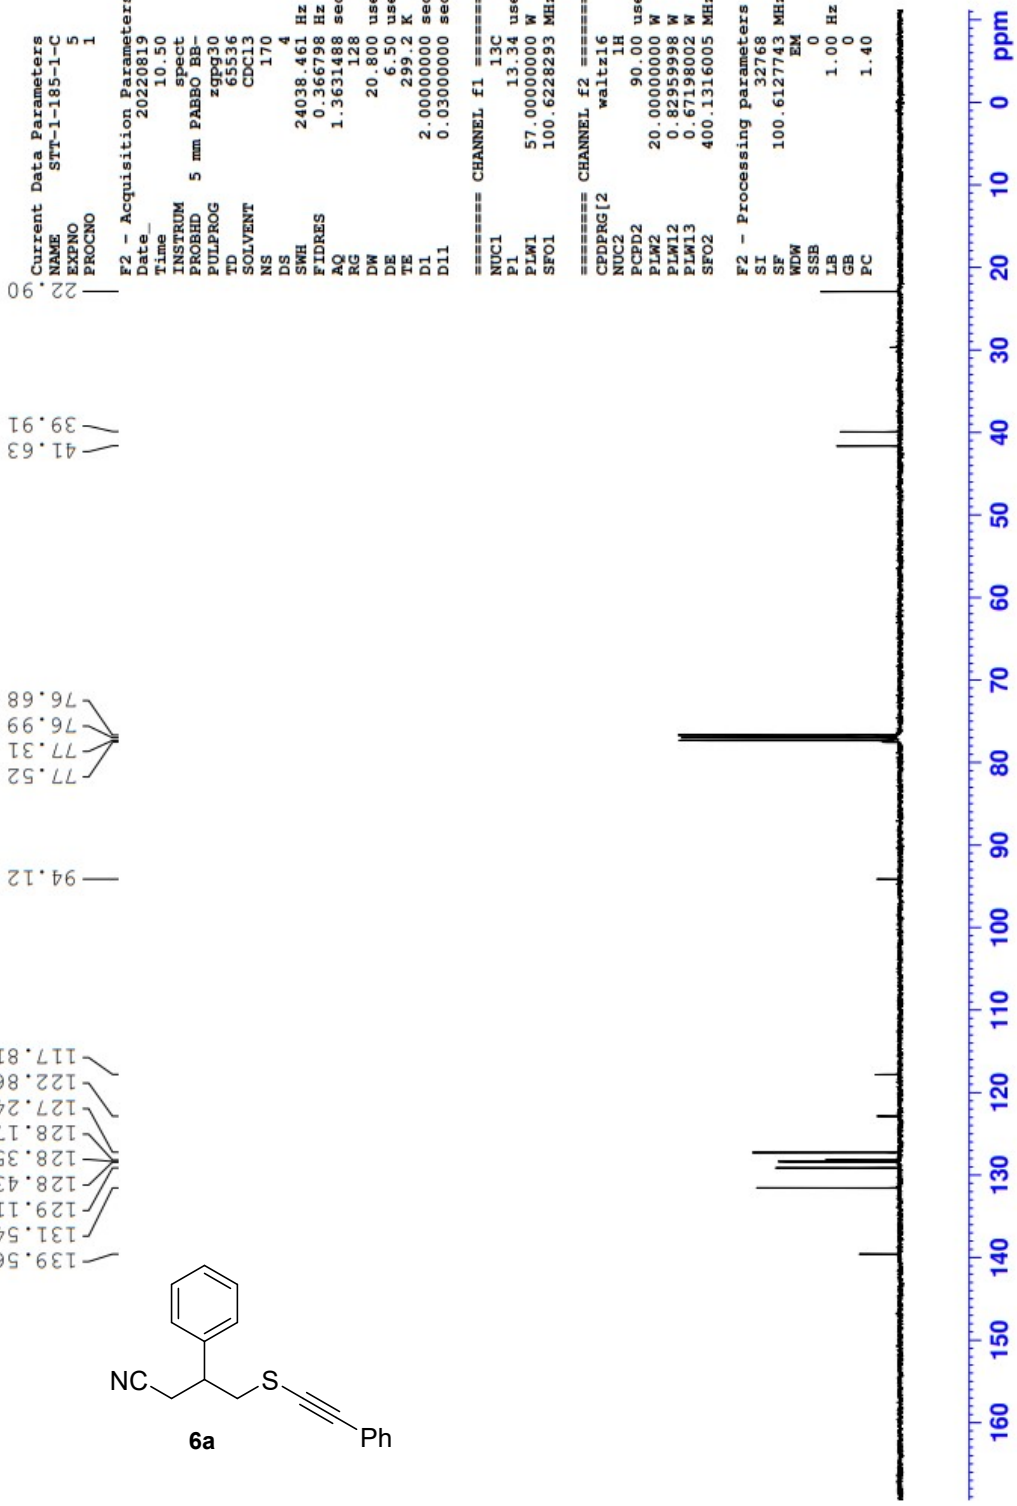

1.30  
2.84  
2.86  
2.89  
2.90  
2.91  
2.92  
2.95  
2.97  
3.04  
3.06  
3.07  
3.09  
3.19  
3.20  
3.22  
3.24  
3.40  
3.42  
3.44  
3.45  
3.46  
3.47

7.21  
7.23  
7.30  
7.31  
7.32  
7.32  
7.38  
7.40  
7.41  
7.42  
7.42  
7.42  
7.43

Current Data Parameters  
 NAME STT-1-193-2-H  
 EXPNO 4  
 PROCNO 1

F2 - Acquisition Parameters  
 Date\_ 20220830  
 Time 11.33  
 INSTRUM spect  
 PROBHD 5 mm PABBO BB-  
 PULPROG zg30  
 TD 65536  
 SOLVENT CDC13  
 NS 16  
 DS 2  
 SWH 8223.685 Hz  
 FIDRES 0.125483 Hz  
 AQ 3.9845889 sec  
 RG 50.8  
 DW 60.800 usec  
 DE 6.50 usec  
 TE 296.9 K  
 D1 1.00000000 sec

===== CHANNEL f1 =====  
 NUC1 1H  
 P1 18.33 usec  
 PLW1 20.0000000 W  
 SFO1 400.1324710 MHz

F2 - Processing parameters  
 SI 65536  
 SF 400.1300205 MHz  
 WDW EM  
 SSB 0  
 LB 0.30 Hz  
 GB 0  
 PC 1.00

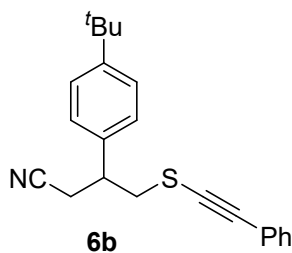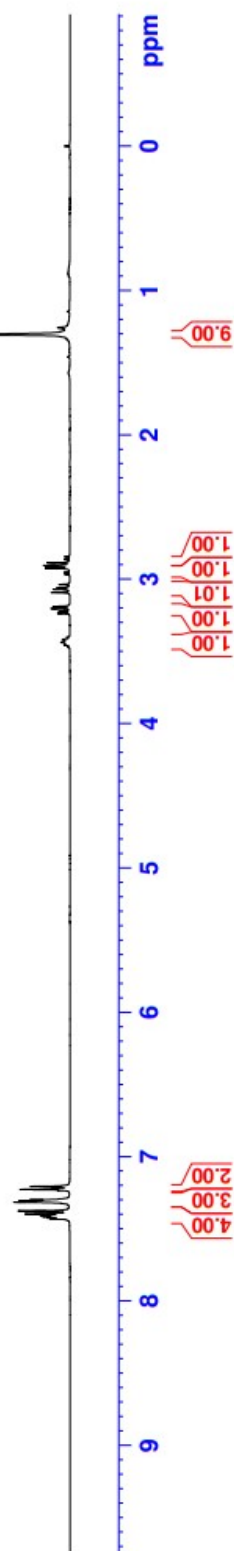

Current Data Parameters  
 NAME ST1-1-193-2-C  
 EXPNO 4  
 PROCNO 1

F2 - Acquisition Parameters  
 Date\_ 20220830  
 Time 11.49  
 INSTRUM spect  
 PROBED 5 mm PABBO BB-  
 PULPROG zgpg30  
 TD 65536  
 SOLVENT CDCl3  
 NS 256  
 DS 4  
 SWH 24038.461 Hz  
 FIDRES 0.366798 Hz  
 AQ 1.3631488 sec  
 RG 128  
 DW 20.800 usec  
 DE 6.50 usec  
 TE 298.1 K  
 D1 2.0000000 sec  
 D11 0.0300000 sec

==== CHANNEL f1 =====  
 NUC1 13C  
 P1 13.34 usec  
 PLW1 57.0000000 W  
 SFO1 100.6228293 MHz

==== CHANNEL f2 =====  
 CPDPRG[2] waltz16  
 NUC2 1H  
 PCPD2 90.00 usec  
 PLW2 20.0000000 W  
 PLW12 0.8295998 W  
 PLW13 0.6719802 W  
 SFO2 400.1316005 MHz

F2 - Processing parameters  
 SI 32768  
 SF 100.6127794 MHz  
 EM  
 WDW 0  
 SSB 0  
 LB 1.00 Hz  
 GB 0  
 PC 1.40

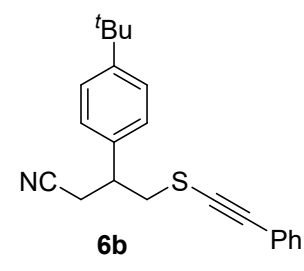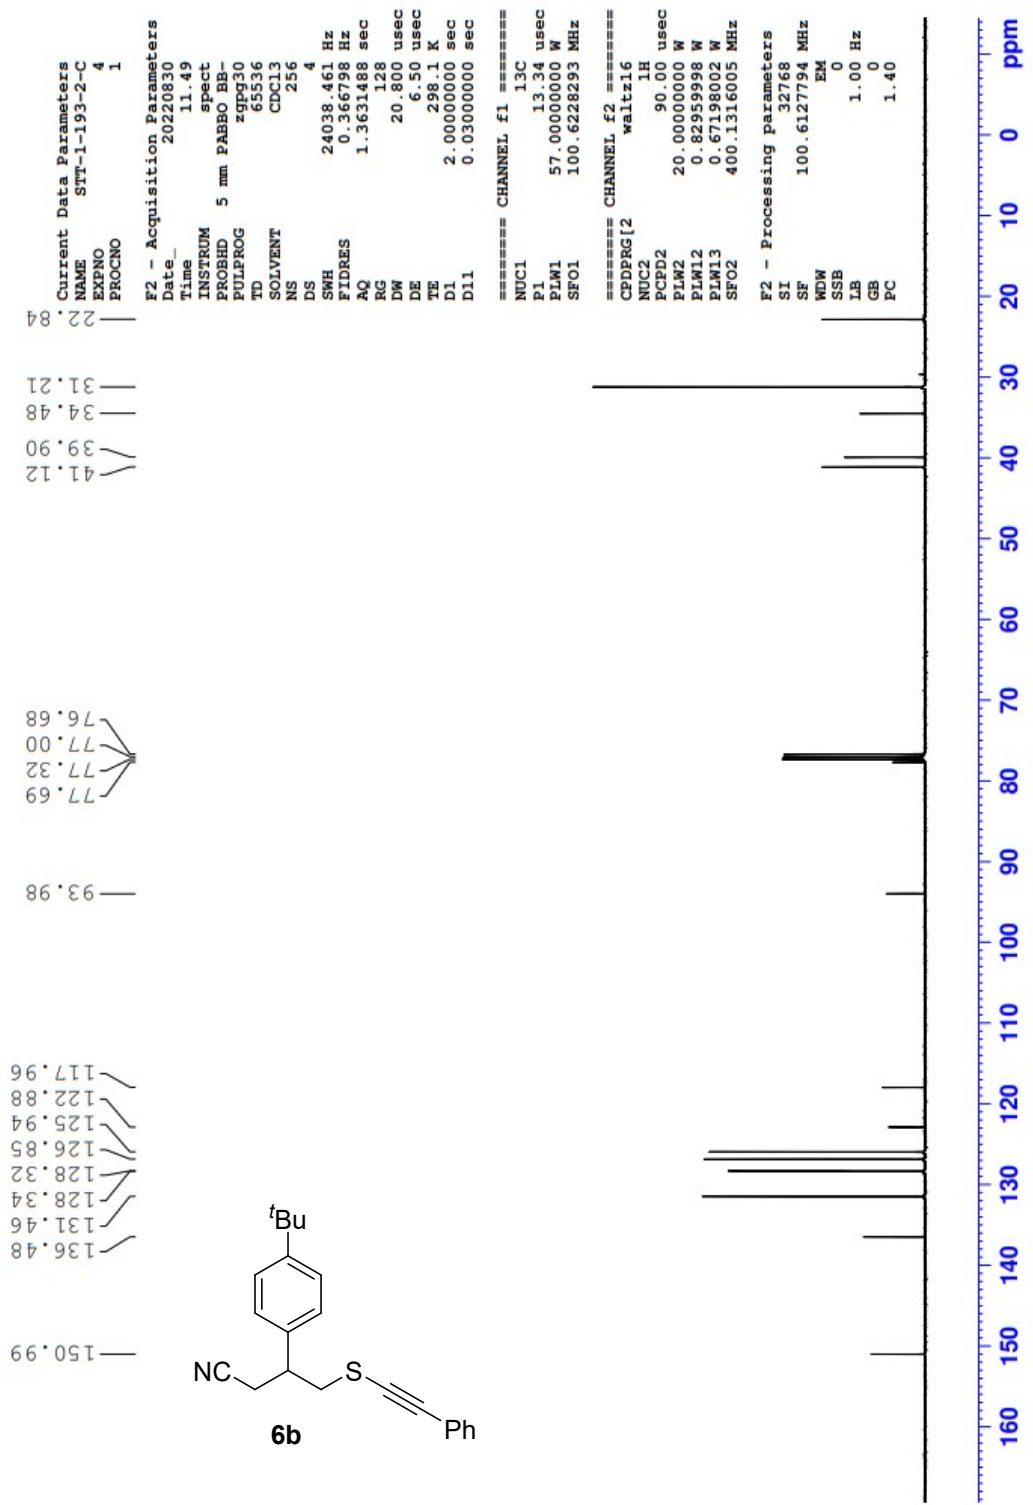

7.96  
7.98  
7.01  
7.02  
7.03  
7.04  
7.06  
7.07  
7.09  
7.10  
7.10  
7.11  
7.13  
7.29  
7.30  
7.32  
7.34  
7.09  
7.10  
7.11  
7.12  
7.13  
7.13  
7.13  
7.14  
7.16  
7.26  
7.27  
7.28  
7.28  
7.30  
7.30  
7.31  
7.32  
7.32  
7.33  
7.34  
7.34  
7.36  
7.37  
7.38  
7.39  
7.41  
7.41  
7.42  
7.42  
7.42  
7.42  
7.43  
7.43  
7.44

Current Data Parameters  
 NAME STT-1-194-2-1-H  
 EXPNO 1  
 PROCNO 1

F2 - Acquisition Parameters  
 Date\_ 20220913  
 Time 14.06  
 INSTRUM spect  
 PROBHD 5 mm FAPBO BB-  
 PULPROG zg30  
 TD 65536  
 SOLVENT CDCl3  
 NS 16  
 DS 2  
 SWH 8223.685 Hz  
 FIDRES 0.125483 Hz  
 AQ 3.9845889 sec  
 RG 161  
 DW 60.800 usec  
 DE 6.50 usec  
 TE 298.9 K  
 D1 1.00000000 sec

===== CHANNEL f1 =====  
 NUC1 1H  
 P1 17.44 usec  
 PLW1 20.0000000 W  
 SF01 400.1324710 MHz

F2 - Processing parameters  
 SI 65536  
 SF 400.1300072 MHz  
 WDW EM  
 SSB 0  
 LB 0.30 Hz  
 GB 0  
 PC 1.00

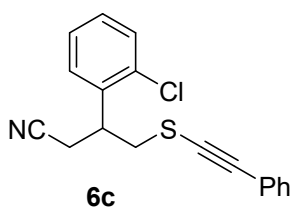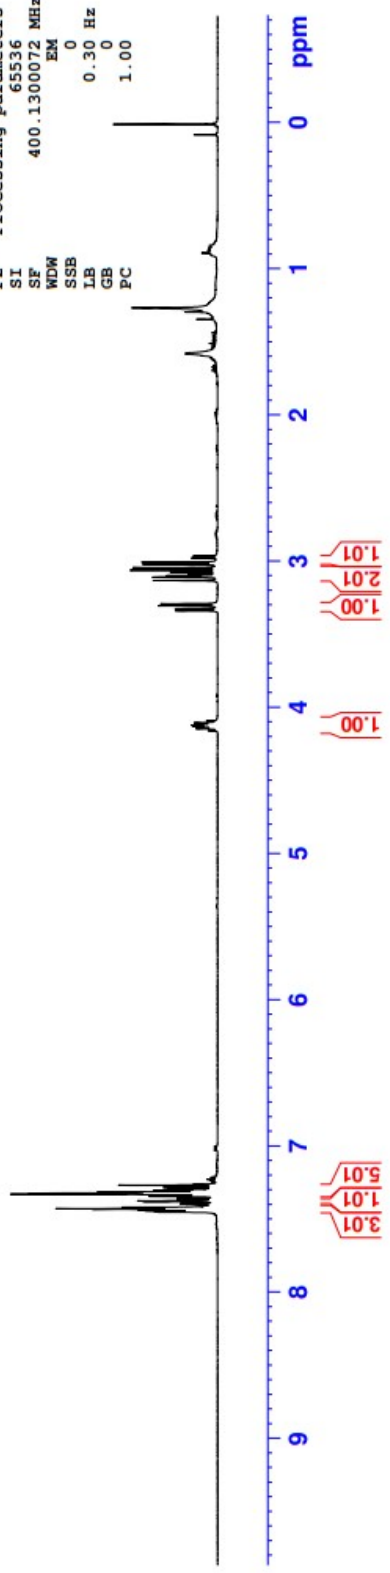



21.23  
 Current Data Parameters  
 NAME STT-1-194-2-C  
 EXPNO 5  
 PROCNO 1  
 F2 - Acquisition Parameters  
 Date\_ 20220830  
 Time 12.10  
 INSTRUM spect  
 PROBHD 5 mm PABBO BB-  
 PULPROG zgpg30  
 TD 65536  
 SOLVENT CDCl3  
 NS 256  
 DS 4  
 SWH 24038.461 Hz  
 FIDRES 0.366798 Hz  
 AQ 1.3631488 sec  
 RG 114  
 DW 20.800 usec  
 DE 6.50 usec  
 TE 298.2 K  
 D1 2.00000000 sec  
 D11 0.03000000 sec  
 ===== CHANNEL f1 =====  
 NUC1 13C  
 P1 13.34 usec  
 PLW1 57.00000000 W  
 SFO1 100.6228293 MHz  
 ===== CHANNEL f2 =====  
 CPDPRG[2] waltz16  
 NUC2 1H  
 PCPD2 90.00 usec  
 PLW2 20.00000000 W  
 PLW12 0.82959998 W  
 PLW13 0.67198002 W  
 SFO2 400.1316005 MHz  
 F2 - Processing parameters  
 SI 32768  
 SF 100.6127735 MHz  
 MDW EM  
 SSB 0  
 LB 1.00 Hz  
 GB 0  
 PC 1.40

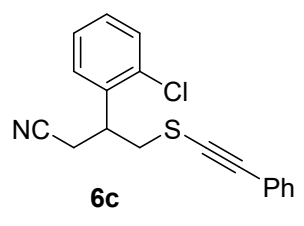

117.45  
 122.85  
 127.53  
 127.93  
 128.33  
 128.37  
 129.26  
 130.24  
 131.42  
 133.83  
 136.63

77.31  
 77.15  
 77.00  
 76.68

94.40

38.22  
 37.46

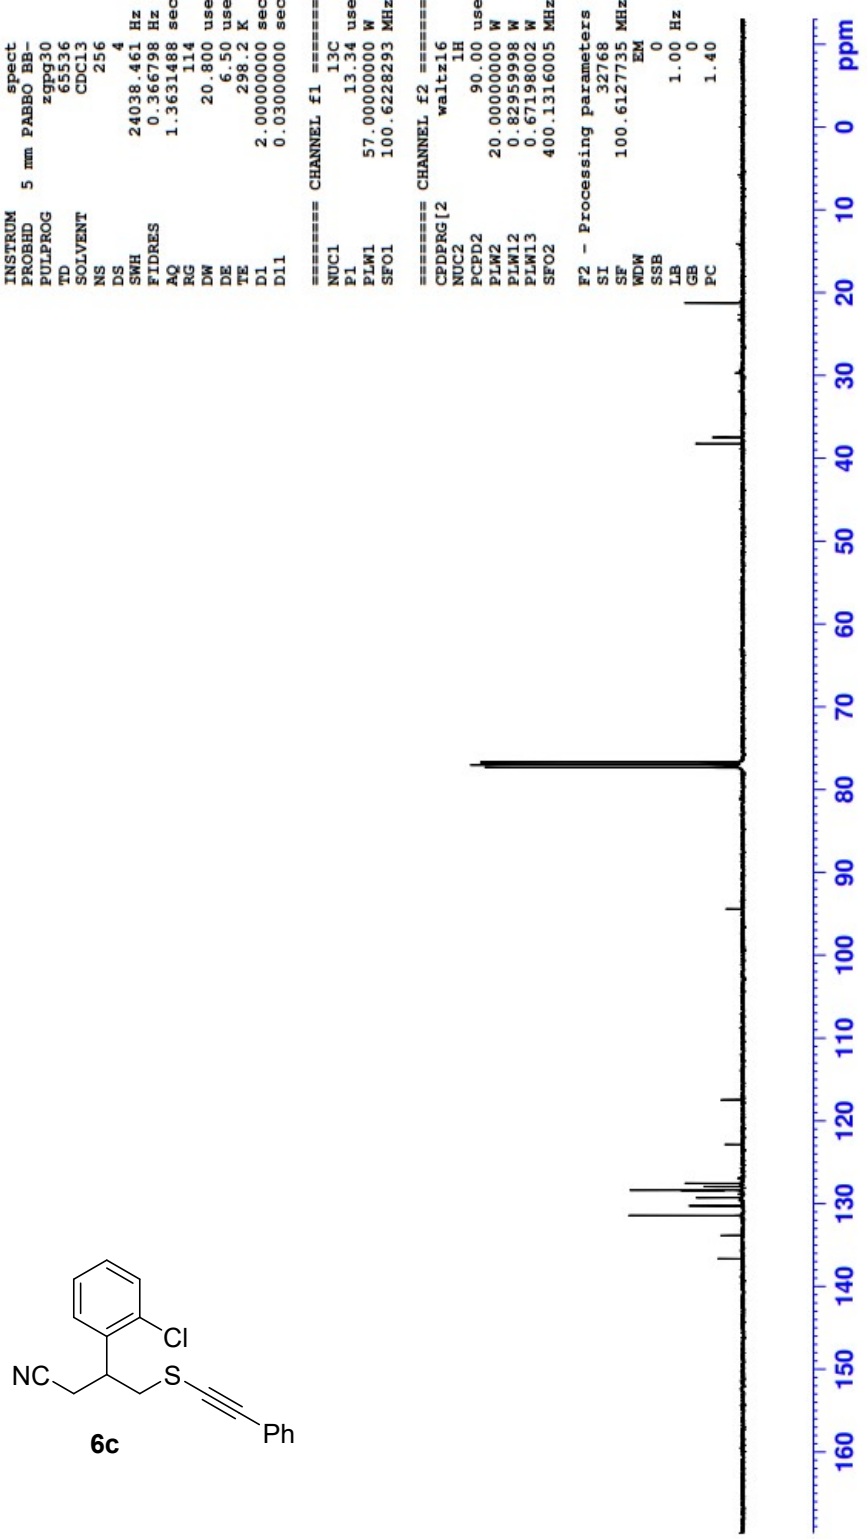

7.39  
7.38  
7.36  
7.33  
7.32  
7.31  
7.31  
7.30  
7.28  
7.28  
7.27  
7.26  
4.19  
4.18  
4.17  
4.16  
4.15  
4.15  
4.15  
4.14  
4.14  
4.14  
4.13  
4.13  
4.12  
4.11  
4.10  
4.09  
4.07  
4.06  
3.37  
3.35  
3.33  
3.32  
3.30  
3.24  
3.22  
3.22  
3.20  
3.20  
3.19  
3.18  
3.16  
3.16  
3.00

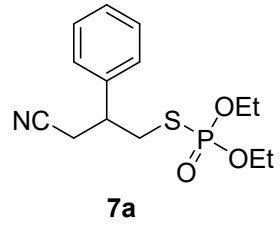

Current Data Parameters  
 NAME STT-1-195-1-H  
 EXPNO 1  
 PROCNO 1

F2 - Acquisition Parameters  
 Date\_ 20220907  
 Time 15.13  
 INSTRUM spect  
 PROBHD 5 mm PABBO BB-  
 PULPROG zg30  
 TD 65536  
 SOLVENT CDC13  
 NS 16  
 DS 2  
 SWH 8223.685 Hz  
 FIDRES 0.125483 Hz  
 AQ 3.9845889 sec  
 RG 32  
 DW 60.800 usec  
 DE 6.50 usec  
 TE 297.8 K  
 D1 1.00000000 sec

===== CHANNEL f1 =====  
 NUC1 1H  
 P1 18.33 usec  
 PLW1 20.0000000 W  
 SFO1 400.1324710 MHz

F2 - Processing parameters  
 SI 65536  
 SF 400.1300004 MHz  
 WDW EM  
 SSB 0  
 LB 0.30 Hz  
 GB 0  
 PC 1.00

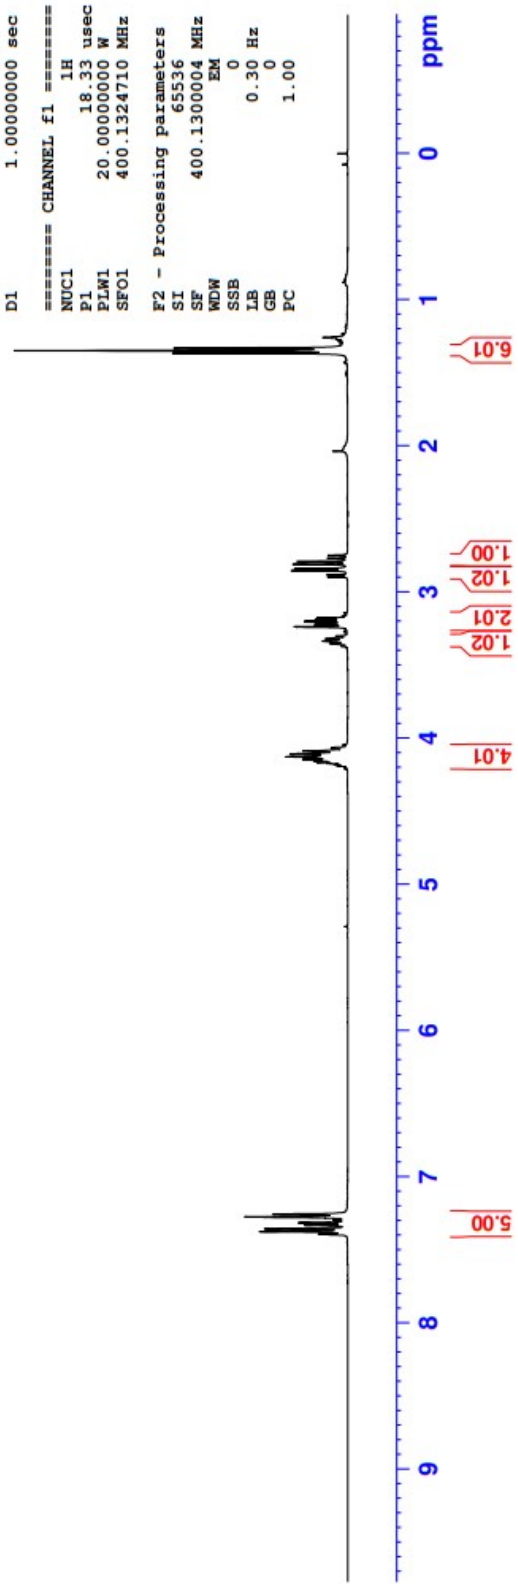

88  
 15.88  
 15.95  
 23.08  
 35.01  
 35.05  
 42.57  
 42.62  
 63.76  
 63.78  
 63.82  
 63.85  
 76.68  
 77.00  
 77.31  
 117.58  
 127.10  
 128.04  
 128.94  
 139.26

Current Data Parameters  
 NAME STT-1-195-1-C  
 EXPNO 1  
 PROCNO 1

F2 - Acquisition Parameters  
 Date\_ 20220907  
 Time 15.27  
 INSTRUM spect  
 PROBHD 5 mm PABBO BB-  
 PULPROG zgpg30  
 TD 65536  
 SOLVENT CDC13  
 NS 200  
 DS 4  
 SWH 24038.461 Hz  
 FIDRES 0.366798 Hz  
 AQ 1.3631488 sec  
 RG 50.8  
 DW 20.800 usec  
 DE 6.50 usec  
 TE 298.8 K  
 D1 2.00000000 sec  
 D11 0.03000000 sec

===== CHANNEL f1 =====  
 NUC1 13C  
 P1 13.34 usec  
 PLW1 57.00000000 W  
 SFO1 100.6228293 MHz

===== CHANNEL f2 =====  
 CPDPRG[2] waltz16  
 NUC2 1H  
 PCPD2 90.00 usec  
 PLW2 20.00000000 W  
 PLW12 0.82959998 W  
 PLW13 0.67198002 W  
 SFO2 400.1316005 MHz

F2 - Processing parameters  
 SI 32768  
 SF 100.6127838 MHz  
 EM  
 SSB 0  
 LB 1.00 Hz  
 GB 0  
 PC 1.40

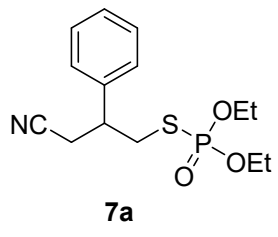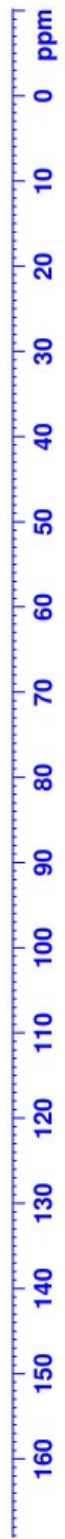

—26.27

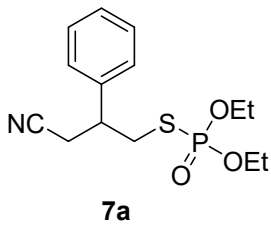

```
Current Data Parameters
NAME      SFT-1-195-1-P
EXPNO     1
PROCNO    1

F2 - Acquisition Parameters
Date_     20220926
Time      9.38
INSTRUM   spect
PROBHD    5 mm PABBO BB-
PULPROG   zgpg30
TD        65536
SOLVENT   CDCl3
NS        16
DS        4
SWH       64102.563 Hz
FIDRES    0.978127 Hz
AQ        0.5111808 sec
RG        203
DW        7.800 usec
DE        6.50 usec
TE        296.8 K
D1        2.00000000 sec
D11       0.03000000 sec

===== CHANNEL f1 =====
NUC1      31P
P1        20.93 usec
PLW1     13.0019986 W
SFO1     161.9674942 MHz

===== CHANNEL f2 =====
CPDPRG2   waltz16
NUC2      1H
PCPD2     90.00 usec
PLW2     20.00000000 W
PLW12    0.75099999 W
PLW13    0.60830998 W
SFO2     400.1316005 MHz

F2 - Processing parameters
SI        32768
SF        161.9755930 MHz
WDW       EM
SSB       0
LB        1.00 Hz
GB        0
PC        1.40
```

120 100 80 60 40 20 0 -20 -40 -60 -80 -100 -120 ppm

1.28  
 1.30  
 1.32  
 1.34  
 1.72  
 1.74  
 2.74  
 2.76  
 2.78  
 2.80  
 2.82  
 2.85  
 2.86  
 3.12  
 3.14  
 3.16  
 3.17  
 3.19  
 3.21  
 3.24  
 3.26  
 3.28  
 3.29  
 3.31  
 4.03  
 4.06  
 4.07  
 4.08  
 4.09  
 4.10  
 4.10  
 4.10  
 4.12  
 4.12  
 4.13  
 4.16  
 7.16  
 7.18  
 7.26  
 7.34  
 7.36

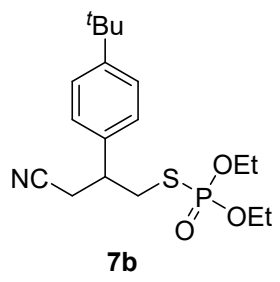

Current Data Parameters  
 NAME STT-1-200-2-H  
 EXPNO 1  
 PROCNO 1  
 F2 - Acquisition Parameters  
 Date\_ 20220919  
 Time 10.14  
 INSTRUM spect  
 PROBHD 5 mm PABBO BB-  
 PULPROG zg30  
 TD 65536  
 SOLVENT CDCl3  
 NS 16  
 DS 2  
 SWH 8223.685 Hz  
 FIDRES 0.125483 Hz  
 AQ 3.9845889 sec  
 RG 32  
 DW 60.800 usec  
 DE 6.50 usec  
 TE 296.5 K  
 D1 1.00000000 sec  
 ===== CHANNEL f1 =====  
 NUC1 1H  
 P1 17.44 usec  
 PLW1 20.00000000 W  
 SF01 400.1324710 MHz  
 F2 - Processing parameters  
 SI 65536  
 SF 400.1300102 MHz  
 WDM EM  
 SSB 0  
 LB 0.30 Hz  
 GB 0  
 PC 1.00

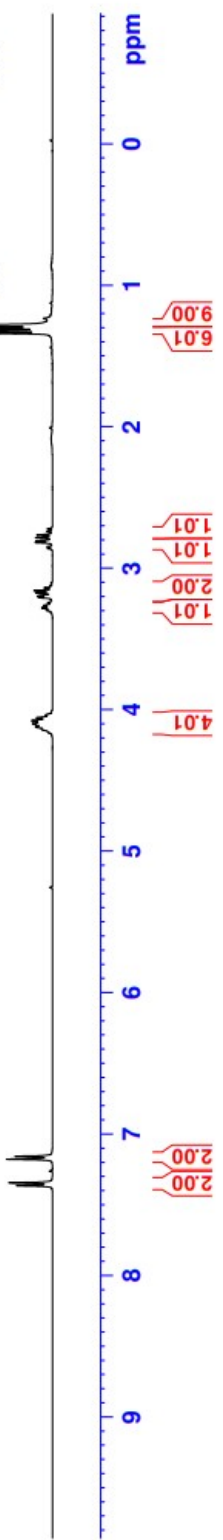

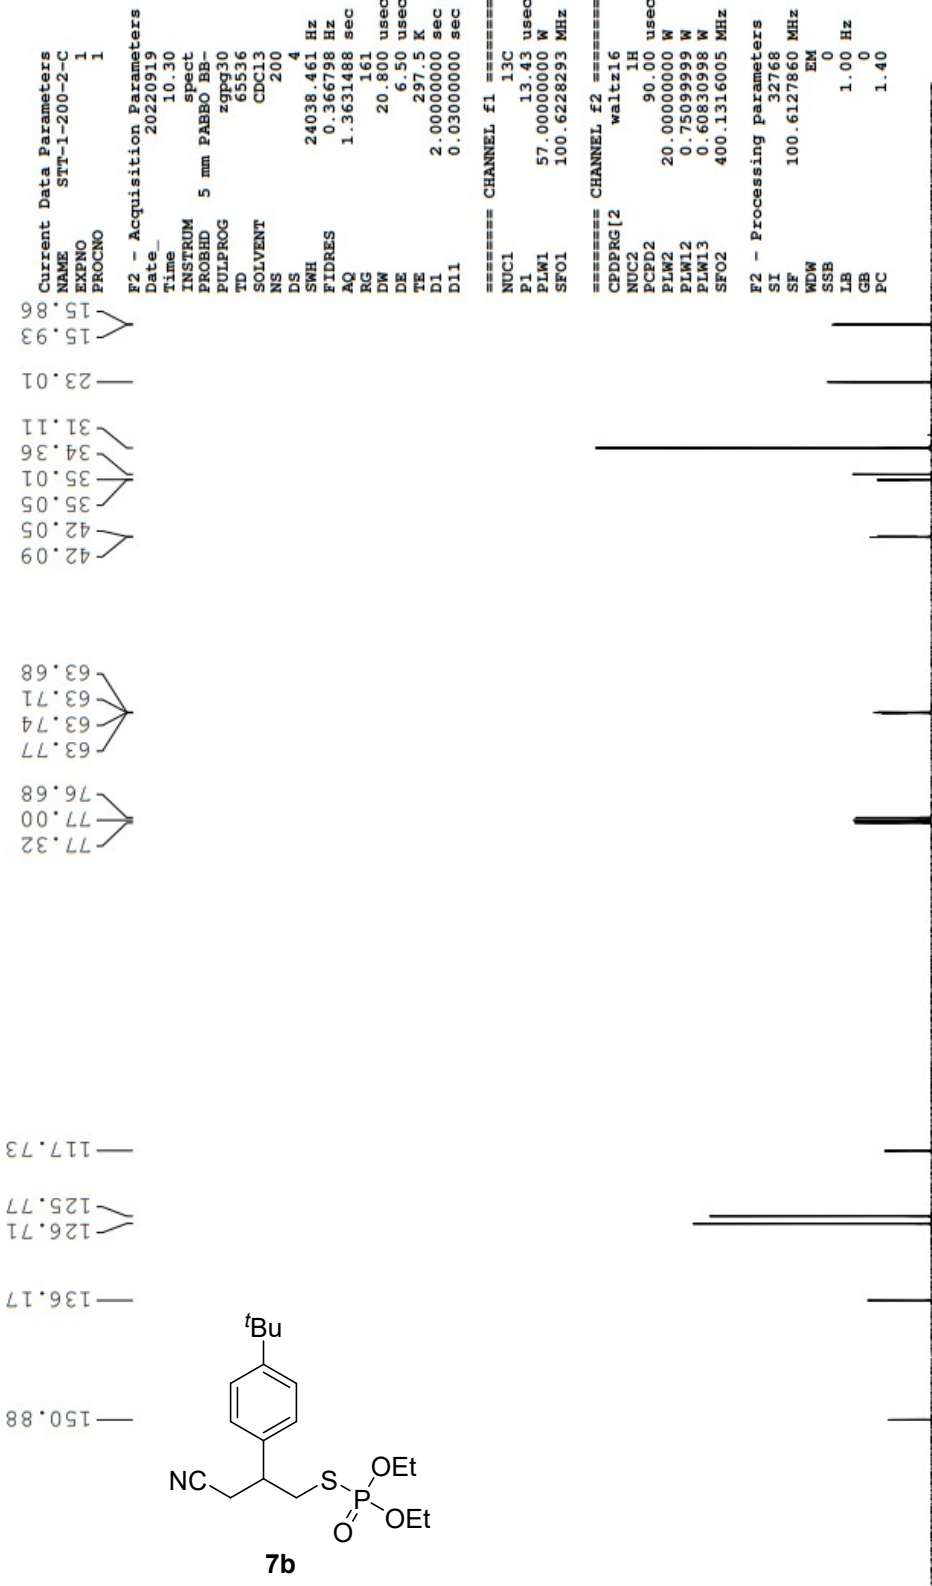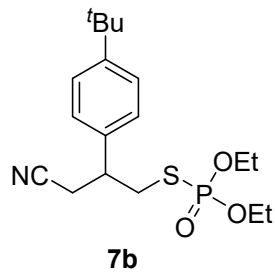

— 26.46

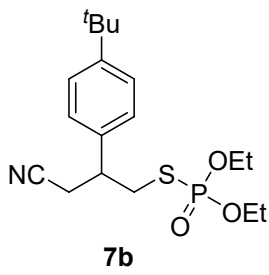

```
Current Data Parameters
NAME      STT-1-200-2-P
EXPNO     1
PROCNO    1

F2 - Acquisition Parameters
Date_     20220919
Time      10.17
INSTRUM   spect
PROBHD    5 mm FABIO BB-
PULPROG   zgpg30
TD         65536
SOLVENT    CDCl3
NS         16
DS         4
SWH        64102.563 Hz
FIDRES     0.978127 Hz
AQ          0.5111808 sec
RG          203
DW          7.800 usec
DE          6.50 usec
TE          296.9 K
D1          2.00000000 sec
D11         0.03000000 sec

===== CHANNEL f1 =====
NUC1       31P
P1         20.93 usec
PLW1       13.0019986 W
SF01       161.9674942 MHz

===== CHANNEL f2 =====
CPDPRG[2] waltz16
NUC2       1H
PCPD2      90.00 usec
PLW2       20.0000000 W
PLW12      0.75099999 W
PLW13      0.60830998 W
SF02       400.1316005 MHz

F2 - Processing parameters
SI          32768
SF          161.9755930 MHz
WDW         EM
SSB         0
LB          1.00 Hz
GB          0
PC          1.40
```

120 100 80 60 40 20 0 -20 -40 -60 -80 -100 -120 ppm



7.44  
7.42  
7.33  
7.29  
7.28  
7.28  
7.27  
7.26  
7.25  
4.22  
4.21  
4.20  
4.19  
4.17  
4.16  
4.16  
4.14  
4.14  
4.14  
4.12  
4.12  
4.12  
4.11  
4.10  
4.09  
4.08  
4.08  
3.96  
3.94  
3.93  
3.91  
3.89  
3.35  
3.33  
3.32  
3.31  
3.30  
3.29  
3.28  
3.27  
3.25  
3.24  
3.22  
2.95  
2.94  
2.91  
2.90  
2.90  
2.90  
2.89  
2.86  
2.85  
1.38  
1.37  
1.36  
1.36  
1.36  
1.35  
1.34  
0.00

Current Data Parameters  
 NAME STT-2-5-1-H  
 EXPNO 1  
 PROCNO 1

F2 - Acquisition Parameters  
 Date\_ 20220926  
 Time 9.44  
 INSTRUM spect  
 PROBHD 5 mm FAPRO BB-  
 PULPROG zg30  
 TD 65536  
 SOLVENT CDCl3  
 NS 16  
 DS 2  
 SWH 8223.685 Hz  
 FIDRES 0.125483 Hz  
 AQ 3.9845889 sec  
 RG 71.8  
 DW 60.800 usec  
 DE 6.50 usec  
 TE 296.2 K  
 D1 1.00000000 sec

==== CHANNEL f1 =====  
 NUC1 1H  
 P1 17.44 usec  
 PLW1 20.0000000 W  
 SFO1 400.1324710 MHz

F2 - Processing parameters  
 SI 65536  
 SF 400.1300021 MHz  
 WDW EM  
 SSB 0  
 LB 0.30 Hz  
 GB 0  
 PC 1.00

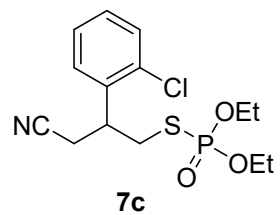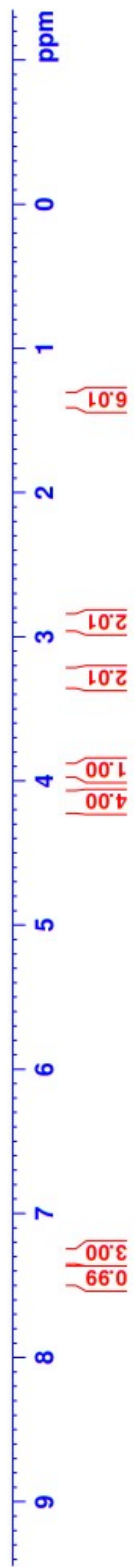

Current Data Parameters  
 STT-2-5-1-C  
 EXPNO 1  
 PROCNO 1

F2 - Acquisition Parameters  
 Date\_ 20220926  
 Time 9.57  
 INSTRUM spect  
 PROBHD 5 mm PABBO BB-  
 PULPROG zgpg30  
 TD 65536  
 SOLVENT CDC13  
 NS 200  
 DS 4  
 SWH 24038.461 Hz  
 FIDRES 0.366798 Hz  
 AQ 1.3631488 sec  
 RG 144  
 DW 20.800 usec  
 DE 6.50 usec  
 TE 297.2 K  
 D1 2.00000000 sec  
 D11 0.03000000 sec

==== CHANNEL f1 =====  
 NUC1 13C  
 P1 13.43 usec  
 PLW1 57.00000000 W  
 SFO1 100.6228293 MHz

==== CHANNEL f2 =====  
 CPDPRG[2] waitz16  
 NUC2 1H  
 P2 90.00 usec  
 PLW2 20.00000000 W  
 PLW12 0.75099999 W  
 PLW13 0.60830998 W  
 SFO2 400.1316005 MHz

F2 - Processing parameters  
 SI 32768  
 SF 100.6127787 MHz  
 WDW EM  
 SSB 0  
 LB 1.00 Hz  
 GB 0  
 PC 1.40

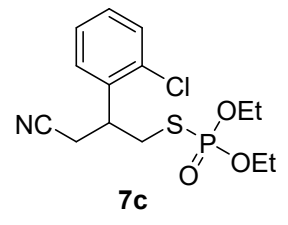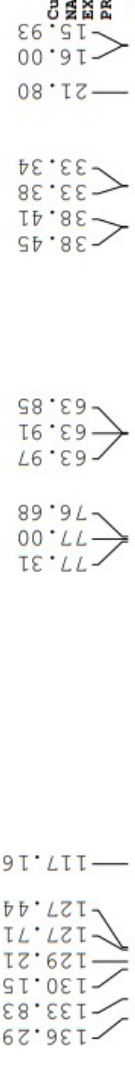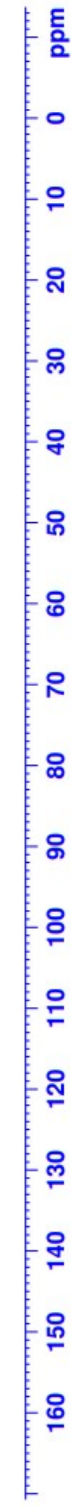

— 26.08

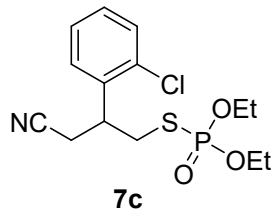

```
Current Data Parameters
NAME      STT-2-5-1-P
EXPNO     1
PROCNO    1

F2 - Acquisition Parameters
Date_     20220927
Time      14.46
INSTRUM   spect
PROBHD    5 mm PABBO BB
PULPROG   zgpg30
TD         65536
SOLVENT   CDCl3
NS         16
DS         4
SWH        64102.563 Hz
FIDRES     0.978127 Hz
AQ         0.5111808 sec
RG         203
DW         7.800 usec
DE         6.50 usec
TE         297.3 K
D1         2.00000000 sec
D11        0.03000000 sec

===== CHANNEL f1 =====
NUC1       31P
P1         20.93 usec
PLW1       13.0019986 W
SFO1       161.9674942 MHz

===== CHANNEL f2 =====
CPDPRG[2] waltz16
NUC2       1H
PCPD2      90.00 usec
PLW2       20.0000000 W
PLW12      0.75099999 W
PLW13      0.60830998 W
SFO2       400.1316005 MHz

F2 - Processing parameters
SI         32768
SF         161.9755930 MHz
WDW        EM
SSB        0
LB         1.00 Hz
GB         0
PC         1.40
```

120 100 80 60 40 20 0 -20 -40 -60 -80 -100 -120 ppm

1.30  
1.32  
1.34  
1.36  
1.45  
1.47  
1.49  
1.51  
2.01  
2.02  
2.04  
2.06  
2.07  
2.51  
2.52  
2.73  
2.75  
2.76  
2.77  
2.79  
2.80  
2.83  
2.95  
2.96  
2.99  
3.00  
3.02  
3.03  
4.09  
4.09  
4.11  
4.12  
4.13  
4.15  
4.17  
4.19  
4.19  
4.20

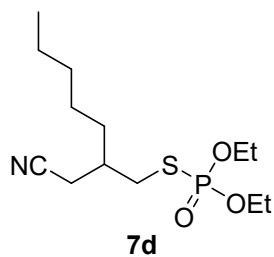

Current Data Parameters  
 Name STT-2-5-2-H  
 ExpNO 1  
 ProcNO 1

F2 - Acquisition Parameters  
 Date\_ 20220929  
 Time\_ 8.04  
 Instrum spect  
 Probed 5 mm PABBO BB-  
 PULPROG zg30  
 TD 65536  
 SOLVENT CDCl3  
 NS 16  
 DS 2  
 SWH 8223.685 Hz  
 FIDRES 0.125483 Hz  
 Aq 3.9845889 sec  
 RG 32  
 DW 60.800 usec  
 DE 6.50 usec  
 TE 296.7 K  
 D1 1.00000000 sec

===== CHANNEL f1 =====  
 NUC1 1H  
 P1 17.44 usec  
 PLW1 20.00000000 W  
 SFO1 400.1324710 MHz

F2 - Processing parameters  
 SI 65536  
 SF 400.1300100 MHz  
 WDW EM  
 SSB 0  
 LB 0.30 Hz  
 GB 0  
 PC 1.00

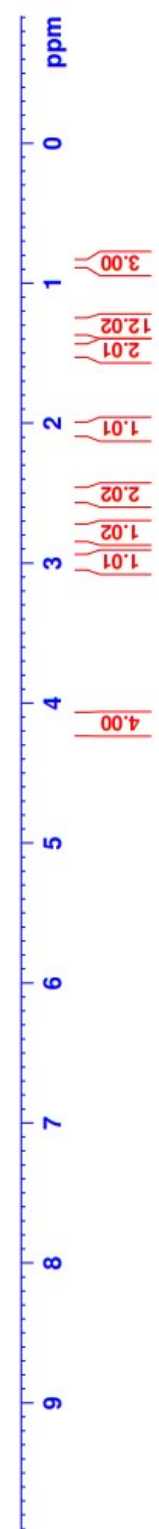

117.72

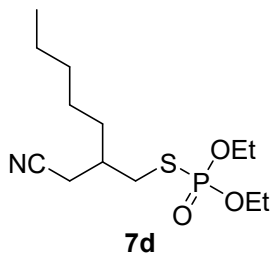

77.31  
77.00  
76.68  
63.83  
63.80  
63.77  
63.74  
36.26  
36.21  
34.09  
34.06  
32.57  
31.46  
26.06  
22.31  
20.72  
16.00  
15.93  
13.85

Current Data Parameters  
NAME STT-2-5-2-C  
EXPNO 1  
PROCNO 1

F2 - Acquisition Parameters  
Date\_ 20220929  
Time 8.19  
INSTRUM spect  
PROBHD 5 mm PABBO BB-  
PULPROG zgpg30  
TD 65536  
SOLVENT CDC13  
NS 200  
DS 4  
SWH 24038.461 Hz  
FIDRES 0.366798 Hz  
AQ 1.3631488 sec  
RG 161  
DW 20.800 usec  
DE 6.50 usec  
TE 297.8 K  
D1 2.0000000 sec  
D11 0.0300000 sec

=====  
CHANNEL f1  
NUC1 13C  
P1 13.43 usec  
PLW1 57.0000000 W  
SFO1 100.6228293 MHz

=====  
CHANNEL f2  
CPDPRG2 waltz16  
NUC2 1H  
PCPD2 90.00 usec  
PLW2 20.0000000 W  
PLW12 0.75099999 W  
PLW13 0.60830998 W  
SFO2 400.1316005 MHz

F2 - Processing parameters  
SI 32768  
SF 100.6127787 MHz  
WDW EM  
SSB 0  
LB 1.00 Hz  
GB 0  
PC 1.40

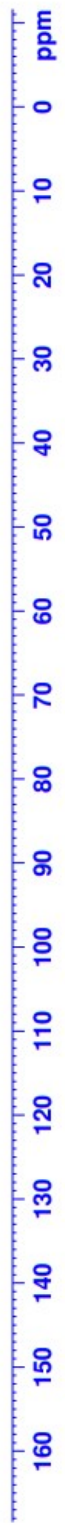

— 26.66

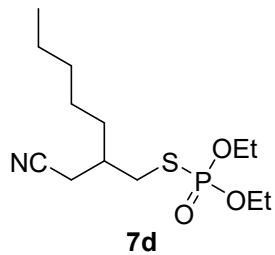

Current Data Parameters  
NAME STY-2-5-2-P  
EXPNO 1  
PROCNO 1

F2 - Acquisition Parameters  
Date\_ 20220929  
Time 8.06  
INSTRUM spect  
PROBHD 5 mm PABBO BB-  
PULPROG zgpg30  
TD 65536  
SOLVENT CDCl3  
NS 16  
DS 4  
SWH 64102.563 Hz  
FIDRES 0.978127 Hz  
AQ 0.5111808 sec  
RG 203  
DW 7.800 usec  
DE 6.50 usec  
TE 297.2 K  
D1 2.00000000 sec  
D11 0.03000000 sec

=====  
CHANNEL f1 =====  
NUC1 31P  
P1 20.93 usec  
PLW1 13.00199986 W  
SFO1 161.9674942 MHz

=====  
CHANNEL f2 =====  
CPDPRG[2] waltz16  
NUC2 1H  
PCPD2 90.00 usec  
PLW2 20.00000000 W  
PLW12 0.75099999 W  
PLW13 0.60830998 W  
SFO2 400.1316005 MHz

F2 - Processing parameters  
SI 32768  
SF 161.9755930 MHz  
WDW EM  
SSB 0  
LB 1.00 Hz  
GB 0  
PC 1.40

120 100 80 60 40 20 0 -20 -40 -60 -80 -100 -120 ppm

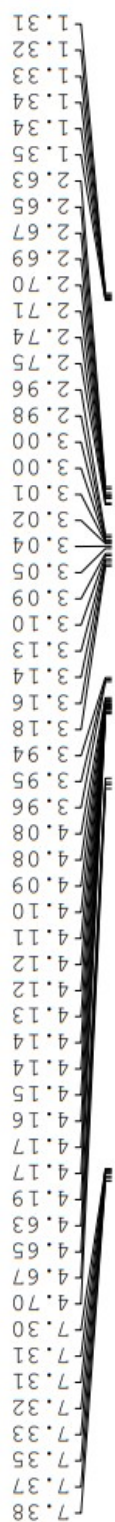

Current Data Parameters  
NAME STY-2-1-1-H  
EXPNO 1  
PROCNO 1

F2 - Acquisition Parameters  
Date\_ 20220919  
Time 9.52  
INSTRUM spect  
PROBHD 5 mm PABBO BB-  
PULPROG zg30  
TD 65536  
SOLVENT CDC13  
NS 16  
DS 2  
SWH 8223.685 Hz  
FIDRES 0.125483 Hz  
AQ 3.9845889 sec  
RG 57  
DE 60.800 usec  
TE 296.5 K  
D1 1.0000000 sec

===== CHANNEL f1 =====  
NUC1 LH  
P1 17.44 usec  
PLW1 20.0000000 W  
SFO1 400.1324710 MHz

F2 - Processing parameters  
SI 65536  
SF 400.1300102 MHz  
WDW EM  
SSB 0  
LB 0.30 Hz  
GB 0  
PC 1.00

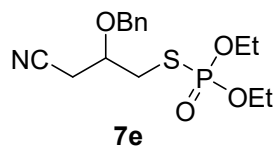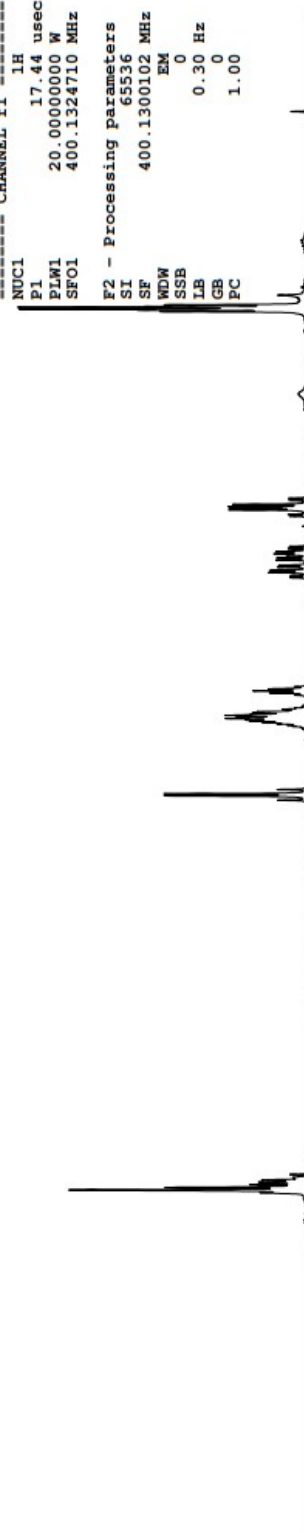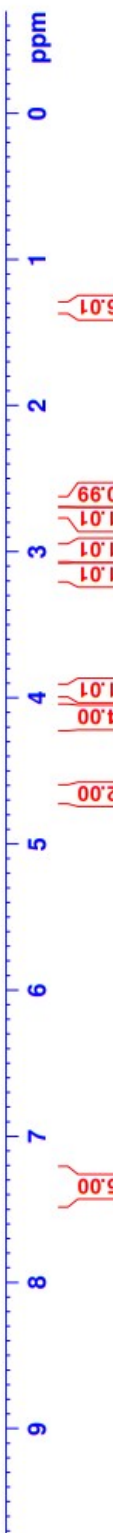



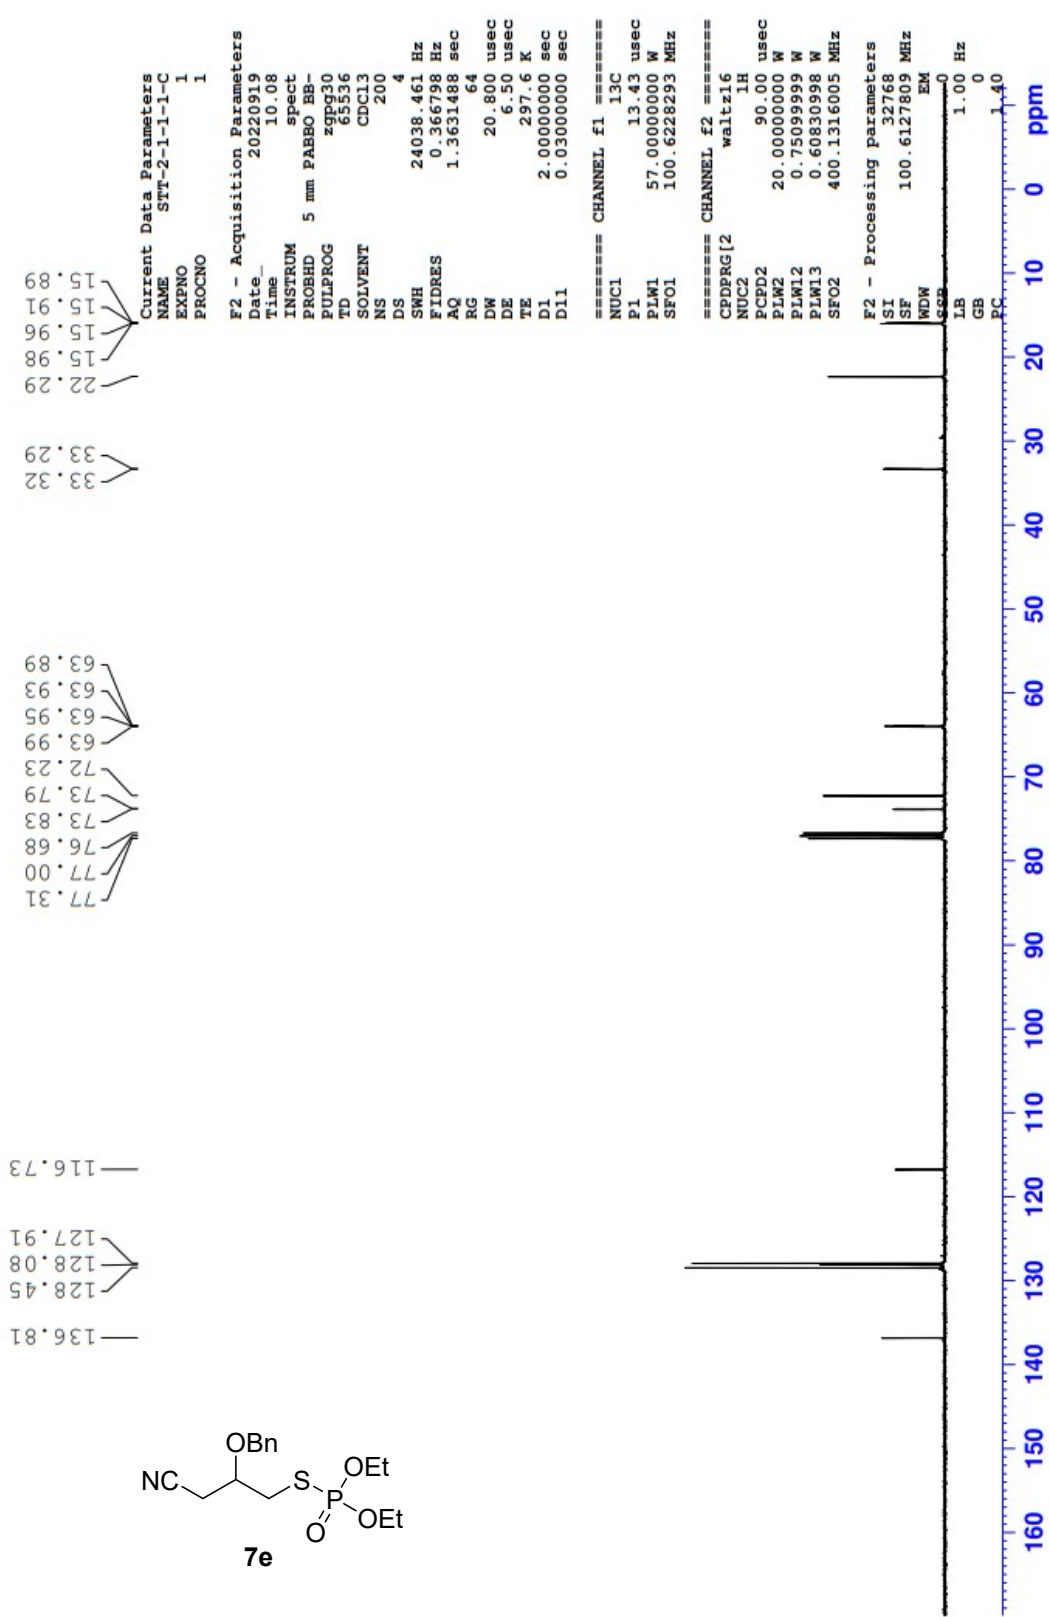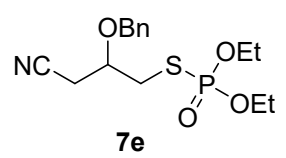

— 26.49

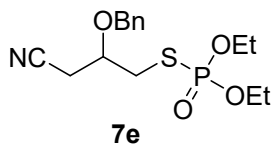

Current Data Parameters  
NAME STT-2-1-1-P  
EXPNO 1  
PROCNO 1

F2 - Acquisition Parameters  
Date\_ 20220919  
Time 9.54  
INSTRUM spect  
PROBHD 5 mm PABBO BE-  
PULPROG zgpg30  
TD 65536  
SOLVENT CDCl3  
NS 16  
DS 4  
SWH 64102.563 Hz  
FIDRES 0.978127 Hz  
AQ 0.5111808 sec  
RG 203  
DW 7.800 usec  
DE 6.50 usec  
TE 297.0 K  
D1 2.0000000 sec  
D11 0.0300000 sec

==== CHANNEL f1 =====  
NUC1 31P  
F1 20.93 usec  
PLW1 13.00199986 W  
SFO1 161.9674942 MHz

==== CHANNEL f2 =====  
CPDPRG2 waltz16  
NUC2 1H  
PCPD2 90.00 usec  
PLW2 20.0000000 W  
PLM12 0.75099999 W  
PLM13 0.60830998 W  
SFO2 400.1316005 MHz

F2 - Processing parameters  
SI 32768  
SF 161.9755930 MHz  
WDW EM  
SSB 0  
LB 1.00 Hz  
GB 0  
PC 1.40

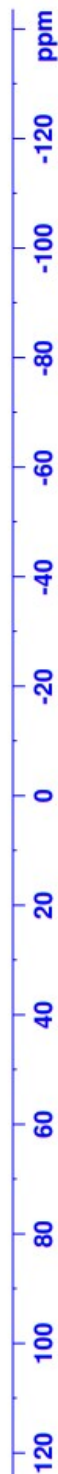

Supplement: d3ob01898a1.pdf [file d3ob01898a1.pdf]
